# Supplementary material for: Volcanism takes a back seat driving global iron deposition after the Great Oxidation Event
Source: Research Square preprint supplement (doi:10.21203/rs.3.rs-3857865/v1), 2024-01-22
Supplement: Supplementary file 1 [file 12bbcef080b14c848cf13930.xlsx]

## Sheet: Iron Formations
Any <0.5% discordant)	single zircon?	location	Formation/unit	Age (Ma)	Mineral	Method	Age calculation	Reported age	Uncertainty	reference	Notes
4 reported as 0% discordant, but concordance may be "due to early lead loss" and no coherent young concordant population exists	yes	Australia	Frere IF TDH26, 386.38-.46 m	1891 ± 8 Ma.	zircon	SHRIMP Curtin	weighted-mean 207Pb/206Pb age on 28 analyses (<5% discordant) on 25 grains (MSWD=1.5). Note 4 concordant young outliers…	1891	8	Rasmussen et al 2012	zircons display significant excess scatter and evidence for early Pb loss. Weighted mean 207Pb/206Pb values with 95% confidence limits. Plots show data with 1σ precision. External precision quoted as 1.1%-1.3%, but unclear if propogated into the reported ages....doesn't seem to be the case
x		Superior Iron formation	Negaunee IF intrusion	1891 ± 3 Ma	baddelyite fractions	TIMS University of Toronto	upper intercept (207Pb/206Pb ages of these four fractions overlap with the average age of 1891±3Ma)	1891	3	N. Pietrzak-Renaud, D. Davis / Precambrian Research 250 (2014) 1–5	No data tables-zircon overgrowths on baddelyite. Reported at 2 sigma uncertainty
3 reported as 0% discordant but concordance may be "due to early lead loss" and no coherent young concordant population exists	yes	Australia	Frere IF TDH26, 374.45-.55 m	1890± 10 Ma.	zircon	SHRIMP Curtin	weighted mean 207Pb/206Pb age of 1890 ± 10 Ma is, in effect, determined by 14 analyses from 10 grains (<5% discordant)	1890	10	Rasmussen et al 2012	All the weighted mean 207Pb/206Pb values in following paragraphs are quoted with 95% confidence limits. Plots show data with 1σ precision. External precision quoted as 1.1%-1.3%, but unclear if propogated into the reported ages....doesn't seem to be the case
x	yes	Australia	Frere IF TDH26, 343.47-.53 m	1889 ± 32	zircon	SHRIMP Curtin	weighted mean 207Pb/206Pb age of 1889 ± 32 (MSWD=1.4). Six analyses <5% discordant from 4 grains	1889	32	Rasmussen et al 2012	All the weighted mean 207Pb/206Pb values in following paragraphs are quoted with 95% confidence limits. Plots show data with 1σ precision. External precision quoted as 1.1%-1.3%, but unclear if propogated into the reported ages....doesn't seem to be the case
x		Labrador Trough Shaferville zone SOUTH	Glomeroporphyry Montagnais gabbro	1884 ±1.6	zircon fraction	TIMS (ID isn't specified, likely ROM lab)	upper interecept	1884	1.6	Findlay et al. (1995)	2sigma error on ages, MSWD=0.62
x		Labrador Trough-castignon lake	Castignon Lake carbonatite dyke	1880 ±2	unknown	unknown	unknown	1880	2	Cheve and Machado (1988)	CONFERENCE ABSTRACT
1	yes	Superior Iron formation	Gunflint reworked ash	1878.3 ± 1.3 Ma,	single zircon	ID-TIMS (ROM lab)	upper intercept age with lower intercept fixed at zero(5 zircons)	1877.5	6.8	Fralick et al 2001	Analysis of one of the colourless zircons gave a discordant datum with a Neoarchean (2725 ± 2 Ma) age. (two sigma errors)
x		Labrador Trough Shaferville zone	Nimish Formation syenite cobbles	1877.8 ± 1.3	zircon fraction	TIMS (ID isn't specified, likely ROM lab)	Upper intercept	1877.8	1.3	Findlay et al. (1995)	2sigma error on ages, MSWD of 1.2.
x		Labrador Trough	Mafic sill: Hellancourt Formation	1874 ±3	zircon fraction (46 and 62 zircons)	TIMS (ID isn't specified, likely ROM lab)	weighted mean 207Pb/206Pb age (2 zircon fractions)	1874	3	Machado et al. (1997)	confirmed the presence of inherited zircon represented by long prisms, Faintly brownish subequant grains and fragments yielded a slightly discordant age of 1870 +4 Ma (C 8-2,) Uncertainties are listed (Table 2) and represented (Fig. 2) at the la level. Ages are quoted at the 9 5 % confidence interval. Table 2; Fig. 2).
x	yes	Superior Iron formation	Hemlock Volcanics	1873.7 ± 9.3 Ma	single zircon	SHRIMP CGS	weighted mean 207Pb/206Pb	1873.7	9.3	Schnieder et al 2002	Sample MI-2: weighted average 207Pb/206Pb age for 8 spots on 6 euhedral, 200 × 50 micron, brown zircons = 1874 ± 9 Ma MSWD = 0.87; Errors on individual zircon spot ages are reported in Table 2 at the 1σ level; weighted mean ages quoted in the text, however, are presented at the 95% level of confidence (2σ). nalyzed by sensitive high-resolution ion microprobe (SHRIMP II) U–Pb geochronology at the …
x		Labrador Trough	Douay Lake rhyodacite	1870 ±4	zircon fraction	TIMS (ID isn't specified, likely ROM lab)	weighted mean 207Pb/206Pb age (15 zircons) (note 206Pb/238U age of 1860)	1870	4	Machado et al. (1997) e	Uncertainties are listed (Table 2) and represented (Fig. 2) at the la level. Ages are quoted at the 9 5 % confidence interval.

## Sheet: Circumsuperior Magmatic Provinc
Any <0.5% discordant)	Single zircon?	location	formation/unit	age	mineral	Method	Age Calculation	Reported age	Uncertainty	reference	Notes
x		Carbonatite complexes	Cargill Township	1907 ±1.4	zircon	UCSB	unknown	1907	1.4	Sage (1988a)	Not clear if 1s or 1s uncertaintyOntario Geological Survey Study Kwon (personal communication, 1987) revised the Cargill zircon U-Pb isotopic age to 1907 4 Ma ( Noted that U-Th-Pb did not behave as a closed system)
x		Fox River Belt	Fox River dyke (98-99-226-1)	1900 ± 14	zircon fraction	TIMS (I think Isotope dilution, but doesn't specify)	weighted average 207Pb/206Pb age of 1900 ± 14 Ma for high Th/U fractions 2, 3, and 6.	1900	14	Heaman et al. (2009)	University of Alberta Radiogenic Isotope Facility. Errors 2sigma
x		Carbonatite complexes	Cargill Township	1896.8 ± 1.4	Baddeleyite fraction	ID-TIMS-Carleton University SPIKE	Concordia	1896.8	1.4	Rukhlov and Bell (2010)	The more radiogenic baddeleyite gives a concordia date of 1896.8 ± 1.4 Ma (MSWD = 0.16) 2 sigma uncertainty
x		Winnipegosis Belt	Carrot River gabbro dyke	1891 ±4	unknown	unknown	unknown	1891	4	Burnham et al. (2004)	Could not find/access report. https://metalearth.geohub.laurentian.ca/search?q=97E-02
x		Cape Smith Belt	Raglan Formation gabbro	1887+39/-11	zircon	unknown	unknown	1887	39	Wodicka et al. (2002)	CONFERENCE ABSTRACT unclear if 1 or 2 sigma
x		Carbonatite complexes	Goldray	1886 ±0.9	zircon fraction	ID-TIMS-Carleton University SPIKE	concordia	1886	0.9	Rukhlov and Bell (2010)	MSWD=2.6 2 sigma uncertainty
3 analyses, (1zr, 1zr and 10zr fraction) concordant BUT "the three concordant fractions #1, 2, and 4 have slightly younger 207Pb/206Pb ages of 1864, 1871, and 1880Ma, respectively and are interpreted to have experienced some Pb-loss during peak THO metamorphism at about 1800 Ma."		Winnipegosis Belt	Bear Island gabbro dyke	1885.2 ± 2.1	zircon fraction	TIMS (I think Isotope dilution, but doesn't specify) University of Alberta Radiogenic Isotope Facility.	upper intercept (MSWD=0.16)	1885.2	2.1	Heaman et al. (2009)	Errors 2sigma, The three concordant fractions #1, 2, and 4 have slightly younger 207Pb/206Pb ages of 1864, 1871, and 1880Ma, respectively and are interpreted to have experienced some Pb-loss during peak THO metamorphism at about 1800 Ma.
x	yes	Pikwitonei–Snow Lake transect area.	Clarke Lake granodiorite,	1885 ±5 Ma	zircon	SHRIMP	weighted-mean 207Pb/206Pb	1885	5	Percival et al., 2005	The errors presented in the text and the ellipses plotted in the figures are reported at the 2σ uncertainty level. The 1σ external errors of 206Pb/238U ratios reported in Table GS-9-1 incorporate a ±1.2% error in calibrating the standard zircon (see Stern and Amelin, 2003). If 1880 Ma mafic magmatism is truly a reflection of a regional plume-driven rifting event, then the Thompson area may repres…
x		Thompson Nickel Belt	Sulphide ores	1885 ±49	Sulfide ore	NA	Re-Os isochron	1885	49	Hulbert et al. (2005)	University of Toronto lab. Errors for age are ±2 sigma errors in Ma.
x	yes	Winnipegosis Belt	Molson Lake gabbronorite dyke	1884.5 ± 3.8 (single zircon)	zircon (1 z, lt tan shard (1) )	TIMS (ID?, but doesn't specify) University of Alberta Radiogenic Isotope Facility.	Weighted mean 207 Pb/206 Pb	1884.5	3.8	Heaman et al. (2009)	Errors 2sigma (note 206Pb/238PU=1855±2 ) - incomplete table cannot reanalyze
x		Carbonatite complexes	Goldray	1884 ±2	zircon	UCSB	unknown	1884	2	Sage (1988b)	Ontario Geological Survey Study S.T. Kwon University of California, Santa Barbra, personal communication, 1987) unpublished data
NO REPORTED UNCERTAINTY 1 concordant fraction 1 Z,a,1M,cI,A		Winnipegosis Belt	Granophyric Cross Lake dyke	1883.7 +1.7/-1.5	zircon fraction	ID-TIMS ROM lab	upper intercept - incomplete table cannot reanalyze	1883.7	1.7	Heaman et al. (1986)	ROM lab mixed tracer solution (Krogh and Davis 1975). The regression lines and the errors associated with the age determinations (quoted at the 95% confidence level)
x		Winnipegosis Belt	Olivine pyroxenite Cuthbert Lake dyke	1883 ±2	zircon fraction	ID-TIMS ROM lab	Weighted Mean 207Pb/206Pb	1883	2	Heaman et al. (1986)	ROM lab mixed tracer solution (Krogh and Davis 1975). The regression lines and the errors associated with the age determinations (quoted at the 95% confidence level)
x		Raglan belt	Katinniq ‘hanging wall’ gabbro	1883.0 ±1.7 Ma	unknown	University of Toronto EARTHTIME SPIKE?	unknown	1883	1.7	(Bleeker and Kamo, 2018)	No Data tables "in press" or unpublished
x		Hudson Bay	Fox River Sill Marginal Zone gabbro	1882.9+1.5/-1.4	zircon fraction	ID-TIMS	Weighted mean 207Pb/206Pb	1882.9	1.45	Heaman et al. (1986)	ROM lab mixed tracer solution (Krogh and Davis 1975). The regression lines and the errors associated with the age determinations (quoted at the 95% confidence level)
x		Cape Smith Belt	Expo-Ungava Intrusive Suite gabbro	1882.7 ± 1.3	zircon	?	unknown	1882.7	1.3	Randall (2005)	UNPUBLISHED THESIS
x		Raglan belt	Katinniqfootwall’ gabbro	1882.1 ±2.0 Ma	unknown	University of Toronto EARTHTIME SPIKE?	unknown	1882.1	2	(Bleeker and Kamo, 2018)	No Data tables "in press" or unpublished
x		Carbonatite complexes	Borden Township	1882 ±3.9	zircon fraction	ID-TIMS-Carleton University SPIKE	207Pb*/206Pb* model date of 1882.0± 3.9 Ma	1882	3.9	Rukhlov and Bell (2010)	2 sigma uncertainty
x		Raglan belt	gabbro sill near Cross Lake	1881.5 ±0.9 Ma	single zircon (4)	University of Toronto EARTHTIME SPIKE?	upper intercept MSWD=0.34	1881.5	0.9	(Bleeker and Kamo, 2018)	No Data tables "in press" or unpublished
x		Carbonatite complexes	Spanish River	1880.6 ±2.4	Baddeleyite fraction	ID-TIMS-Carleton University SPIKE	207Pb*/206Pb* model date	1880.6	2.4	Rukhlov and Bell (2010)	2 sigma uncertainty The baddeleyite is slightly discordant (4.7%) with a 207Pb*/206Pb* date of 1880.6± 2.4 Ma using the model Pb isotopic composition at 1890 Ma (Stacey and Kramers 1975) for the common Pb correction.
one zircon fraction 0.03 discordant		Thompson Nickel Belt	South Setting Lake pyroxenite	1879.9 ± 5.0	zircon fraction	ID-TIMS	weighted-mean 207Pb/206Pb	1879.9	5	Hulbert et al. (2005)	University of Toronto lab. Errors for age are ±2 sigma errors in Ma. age and uncertainty of single, older concordant analysis (C3) best estimate magmatic age of the pyroxenite, at 1880 ± 5 Ma.
x		Labrador Trough	Montagnais sills’	1878.5 ± 0.8 Ma.	single zircon	University of Toronto EARTHTIME SPIKE?	unknown	1878.5	0.8	(Bleeker and Kamo, 2018)	No Data tables "in press" or unpublished
x		Lake Superior region	Lamprophyre on Little Presque Isle	1877.2 ± 5.3	Ar-Ar phlogopite	NA	Ar-Ar phlogopite	1877.2	5.3	Craddock et al. (2007)	not zircon
x		Winnipegosis Belt	Cauchon Lake gabbro dyke	1877+7/-4	zircon fractions	TIMS (ID isn't specified)	Upper intercept	1877	7	Halls and Heaman (2000)	University of Alberta, and three at the Royal Ontario Museum. All errors 2sigma
x		Thompson Nickel Belt	Paint Lake pyroxenite sill	1876.7 ± 5.1	zircon fraction	TIMS (ID isn't specified)	upper intercept (MSWD 0.62)	1876.7	5.1	Heaman et al. (2009)	8 of these were single grains University of Alberta Radiogenic Isotope Facility. (errors =2sigma)
x		Pickle Crow dykes	Gabbroic portion of dyke	1876 ±8	Ar-Ar hornblende	NA	Ar-Ar hornblende	1876	8	Buchan et al. (2003)	CONFERENCE ABSTRACT
x		Thompson Nickel Belt	Mystery Lake monzogranite (89234A).	1874.6 ± 3.4 Ma	zircon fraction	TIMS (ID isn't specified)	upper intercept??	1874.6	3.4	Heaman et al. (2009)	8 of these were single grains University of Alberta Radiogenic Isotope Facility. (errors =2sigma)
x		Carbonatite complexes	Borden Township	1872 ±13	whole rock	NA	Pb-Pb isochron	1872	13	Bell et al. (1987)	unclear if 1 or 2 sigma
x	yes	Thompson Nickel Belt	TH07-01 Pipe 2 Pit Zircon (untreated/air abrasion)	1870.8±2.5	zircon single grains OR fragments	ID-TIMS at UBC	206Pb/238U	1870.8	2.5	Scoates, et al 2017	EARTHTIME SPIKE all other grains/chemically abraded grains/zircon fractions strongly discordant. all errors were quoted at the 2σ level.
x		Hudson Bay	Fort Albany dolerite dyke	1870.7 ±1.1	baddeleyite fraction	ID-TIMS Jack Satterly Geochronology Laboratory, University of Toronto	U-Pb upper intercept	1870.7	1.1	Hamilton and Stott (2008)	Ontario Geological Survey Open File Report errors 2sigma
x	yes	Winnipegosis Komatiite Belt	borehole RP92–4,	1870.3 ± 7.1 Ma	zircon	SHRIMP	Weighted mean 207Pb/206Pb age of 14 points	1870.3	7.1	Waterton 2017	(95% confidence limits. flow or sill? zircons fractured with mottled and irregular dark patches in BSE, indicative of metamictisation and alteration.
x		Cape Smith Belt	Chukotat Group gabbro	1870 ±4	zircon	NA	unknown	1870	4	St-Onge et al. (1992)	No published data in this paper…. Unclear if 1 or 2 sigma
x		Carbonatite complexes	Carb Lake	1865 ±22	zircon fraction	ID-TIMS-Carleton University SPIKE	207Pb*/206Pb* model date	1865	22	Rukhlov and Bell (2010)	207Pb*/206Pb* model date of 1865±22 Ma relative to the same common Pb correction (Table 7). 2 sigma uncertainty
x		Winnipegosis Belt	Coarse grained mafic unit	1864+6/-4	unknown	unknown	unknown	1864	6	Hulbert et al. (1994)	CONFERENCE ABSTRACT updated by Waterton et al. 2017
x	yes	Thompson Nickel Belt	metagabbro dyke located in the Thompson south pit	1855±13Ma	zircon	SHRIMP	unknown	1855	13	Bleeker and Hamilton, 2001)	Geological Association of Canada–Mineralogical Association of Canada, Joint Annual Meeting, Abstracts
***OMITTED OUTRIGHT DATES ONLY PUBLISHED IN ABSTRACTS! INCLUDING:****
Flaherty Formation basalts	Hudson Bay	Pb-Pb isochron	1960 ± 80	Todt et al. (1984)
Haig Sills	Hudson Bay	U-Pb	1870 ±4 OR 1870 ±3 badde- leyite from two samples of Haig intrusions yielded indistinguish- able U–Pb dates of 1870.3 ± 0.7 and 1870.1 ± 1 Ma (Hamilton et al., 2009).	Hamilton, M.A., Buchan, K.L., Ernst. R.E., Stott, G.M., 2009. Widespread and short- lived 1870 Ma mafic magmatism along the northern Superior craton margin. 2009 Joint Assembly (AGU, CGU, GS, GAC, IAH–CNC, MAC, MSA, SEG), 24–27 May 2009, Toronto, Ont., Canada [Abstract].

## Sheet: Penokean  igneous
<0.5% discordant?	formation or unit	age	mineral	Method	Age calculation	Reported age	Uncertainty	reference	Notes
x	Foliated tonalite, Conants Rapids VS82-105	1892 ± 9	zircon fraction	TIMS? University of Kansas,	U-Pb upper intercept	1892	9	Sims et al., 1989;	1 , concordia intercept ages by W. R. Schmus (unpublisheddata); published in Sims et al 1989
x	Twelve Foot Falls quartz diorite	1889 ± 6 Ma	zircon	SIMS National Ion Microprobe Facility at the University of California, Los Angeles.	weighted mean 207Pb/206Pb age 15 spots on nine zircon grains. The Th/U < 0.5. 1875 to 1905 Ma ages--> that define a discord with a weighted mean 207Pb/206Pb age of 1889 ± 6 Ma (MSWD: =3.3)	1889	6	Holm et al. (2020),	No external uncertainty. Errors on individual spot ages are reported at the 1σlevel and weighted mean ages are presented at the 95% level of confidence (2σlevel) based on the 207Pb/206Pb isotopic ratios.	Zircon grains are colorless and mostly doubly terminated euhedral grains. A total of 15 spots on nine zircon grains were analyzed. The Th/ U values are generally < 0.5. The ages range from 1875 to 1905 Ma that define a discord with a weighted mean 207Pb/206Pb age of 1889 ± 6 Ma (MSWD: =3.3; Fig. 6a and Supplementary Table 1
x	Tonalite, Big Falls dam VS73-40	1889 ± 7	zircon fraction	TIMS? University of Kansas,	U-Pb upper intercept	1889	7	Sims et al., 1989;	1 , concordia intercept ages by W. R. Schmus (unpublisheddata); published in Sims et al 1989
x	Tonalitic gneiss near Winter	1885 ± 65	whole rock	?	Rb-Sr	1885	65	Sims and Peterman (1980) cited by Sims et al 1989
x	Foliated tonalite near Ladysmith	1885 ± 65	whole rock	?	Rb-Sr	1885	65	Sims and Peterman (1980) cited by Sims et al 1989
x	Foliated tonalite in South Fork, Flambeau River	1885 ± 65	whole rock	?	Rb-Sr	1885	65	Sims and Peterman (1980) cited by Sims et al 1989
x	Older suite Wisconsin basement complex	1880 ± 30 Ma	zircon fraction	?	?	1880	30	Van Schmus (1976)	Data from unpublished work of mine in progress (Note, "Penokean accretion 1875–1835 Van Schmus (1976)" not supported directly")
1	Bradbury Creek granodiorite	1877 ± 15	single zircon?	ID-TIMS University of Kansas, Lawrence, Kansa	upper concordia intercept ages	1877	15	Holm et al 2005	GSA Data Repository item 2005057, isotope dilution (TIMS) U-Pb zircon data for samples from Minnesota, Wisconsin, and Michigan and 40Ar/39Ar analytical data for incremental heating experiments, east-central Minnesota, is available on the Web at http://www.geosociety.org/pubs/ft2005.htm
x	Granite west of Neillsville VS76-18	1871 ± 5	zircon fraction	TIMS? University of Kansas,	U-Pb upper intercept	1871	5	Sims et al., 1989;	1 , concordia intercept ages by W. R. Schmus (unpublisheddata); published in Sims et al 1989
x	Granite, Grandmother dam VS76-18	1870 ± 7	zircon fraction	TIMS? University of Kansas,	U-Pb upper intercept	1870	7	Sims et al., 1989;	1 , concordia intercept ages by W. R. Schmus (unpublisheddata); published in Sims et al 1989
x	Rhyolite porphyry, Jennings VS76-18	1869 ± 6	zircon fraction	TIMS? University of Kansas,	U-Pb upper intercept	1869	6	Sims et al., 1989;	1 , concordia intercept ages by W. R. Schmus (unpublisheddata); published in Sims et al 1989
x	Rhyolite associated with Quinnesec Formation	1866 ± 39	zircon fraction	TIMS?	U-Pb upper intercept	1866	39	Sims et al., 1989;	3 , Banks and Cain (1969) data recaluclated by Sims et al., 1989 (new constants); Now Superceeded by Zi et al 2021
x	Dunbar Gneiss	1862 ± 5	zircon fraction	TIMS?	U-Pb upper intercept	1862	5	Sims et a l . ( 1 9 8 5 ~	Superceeded by Zi et al 2021
x	Newingham Tonalite	1861 ± 40	zircon fraction	TIMS?	U-Pb upper intercept	1861	40	Sims et a l . ( 1 9 8 5 ~	Superceeded by Zi et al 2021
x	Tonalite north of Dancy VS84-1	1860 ± 7	zircon fraction	TIMS? University of Kansas,	U-Pb upper intercept	1860	7	Sims et al., 1989;	1 , concordia intercept ages by W. R. Schmus (unpublisheddata); published in Sims et al 1989
x	Mafic-felsic Penkoean volcanism	1,859 ± 20	zircon fraction	Nier type Mass Spec	Upper intercept U-Pb (Appears that this fitted through samples that are then expanded upon in Sims et al 1989)	1859	20	Van Schmus (1980) rocks described in Maass et al. (1980)	Jaffrey Decay constants
6	Beecher For- mation 190615-2	1842 ± 7	zircon	SHRIMP	weighted mean	1		Zi et al 2021	1sigma errors
1	Beecher For- mation (19061504)	1842 ± 15	zircon	SHRIMP	weighted mean			Zi et al 2021	1sigma errors
3	Dunbar Gneiss	1845 ± 7	zircon	SHRIMP	weighted mean			Zi et al 2021	1sigma errors
1	Newingham Tonalite	1847 ± 10	zircon	SHRIMP	weighted mean			Zi et al 2021	1sigma errors
x	Metarhyolite, Eau Claire River VS74-10	1858 ± 5	zircon fraction	TIMS? University of Kansas,	U-Pb upper intercept	1858	5	Sims et al., 1989;	1 , concordia intercept ages by W. R. Schmus (unpublisheddata); published in Sims et al 1989
	Tonalitic gneiss, Hillman migmatite	1858 ± 11	single zircon?	ID-TIMS University of Kansas, Lawrence, Kansa	upper concordia intercept ages	1858	11	Holm et al 2005	GSA Data Repository item 2005057, isotope dilution (TIMS) U-Pb zircon data for samples from Minnesota, Wisconsin, and Michigan and 40Ar/39Ar analytical data for incremental heating experiments, east-central Minnesota, is available on the Web at http://www.geosociety.org/pubs/ft2005.htm
x	Granite, Wien Township VS76-34	1857 ± 19	zircon fraction	TIMS? University of Kansas,	U-Pb upper intercept	1857	19	Sims et al., 1989;	1 , concordia intercept ages by W. R. Schmus (unpublisheddata); published in Sims et al 1989
x	Xenolith, Little Falls VS76-34	1856 ± 5	zircon fraction	TIMS? University of Kansas,	U-Pb upper intercept	1856	5	Sims et al., 1989;	1 , concordia intercept ages by W. R. Schmus (unpublisheddata); published in Sims et al 1989
x	Granite near Cherokee VS76-34	1853 ± 21	zircon fraction	TIMS? University of Kansas,	U-Pb upper intercept	1853	21	Sims et al., 1989;	1 , concordia intercept ages by W. R. Schmus (unpublisheddata); published in Sims et al 1989
x	Granophyre near Mosinee VS79-51	1852 ± 13	zircon fraction	TIMS? University of Kansas,	U-Pb upper intercept	1852	13	Sims et al., 1989;	1 , concordia intercept ages by W. R. Schmus (unpublisheddata); published in Sims et al 1989
x	Gneiss at Pine Lake VS79-61	1852 ± 15	zircon fraction	TIMS? University of Kansas,	U-Pb upper intercept	1852	15	Sims et al., 1989;	1 , concordia intercept ages by W. R. Schmus (unpublisheddata); published in Sims et al 1989
x	Tonalitic gneiss near Winter	1848 ± 58	zircon fraction	TIMS? University of Kansas,	U-Pb upper intercept	1848	58	Sims et al., 1989;	7, concordia intercept ages by Z. E. Peterman (unpublished data
	Newingham Tonalite (190615-6)	1847 ± 10 Ma	zircon	SHRIMP Curtin Univerisity	Twelve concordant and low-common Pb analyses were used to calculate a weighted mean 207Pb/206Pb date of 1847 ± 10 Ma (n = 12, MSWD = 0.64; Fig. 5B),	1847	10	Zi et al 2021	unless otherwise specified, only analyses having discordance within ± 5% and f206 <1%
x	Tonalite near Mosinee VS73-18	1847 ± 16	zircon fraction	TIMS? University of Kansas,	U-Pb upper intercept	1847	16	Sims et al., 1989;	1 , concordia intercept ages by W. R. Schmus (unpublisheddata); published in Sims et al 1989
x	Tonalite gneiss, Lincoln County VS76-31	1846 ± 20	zircon fraction	TIMS? University of Kansas,	U-Pb upper intercept	1846	20	Sims et al., 1989;	1 , concordia intercept ages by W. R. Schmus (unpublisheddata); published in Sims et al 1989
x	Granodiorite near Dudley VS79-84	1846 ± 11	zircon fraction	TIMS? University of Kansas,	U-Pb upper intercept	1846	11	Sims et al., 1989;	1 , concordia intercept ages by W. R. Schmus (unpublisheddata); published in Sims et al 1989
	Dunbar Gneiss (190615-5)	1845 ± 7 Ma	zircon	SHRIMP Curtin Univerisity	mean 207Pb/206Pb dates of 1845 ± 7 Ma: Fifty-eight analyses were obtained from 42 zircon grains, of which 33 were rejected because of large discordance or high common 206Pb. The re- maining 22 analyses yielded two populations, with mean 207Pb/206Pb dates of 1845 ± 7 Ma (n=17, MSWD=1.01) and 1783±14Ma (n = 5, MSWD = 0.16) (Fig. 5A).	1845	7	Zi et al 2021	unless otherwise specified, only analyses having discordance within ± 5% and f206 <1%
	Beecher Formation 190615-2 “rhyolite associated with the Quinnesec Forma- tion” 190615-2	1842 ± 7	zircon	SHRIMP Curtin Univerisity	mean 207Pb/206Pb date of 1842 ± 7 Ma (n = 32; mean square of weighted deviates [MSWD] = 0.98)	1842	7	Zi et al 2021	The ca. 1750 Ma analyses from two zircon grains likely reflect the influence of a metamorphic overprint. unless otherwise specified, only analyses having discordance within ± 5% and f206 <1%
x	Older Penokean Tonalite	1842 ± 10	zircon fraction	Nier type Mass Spec	Upper intercept U-Pb (Appears that this fitted through samples that are then expanded upon in Sims et al 1989)	1842	10	Van Schmus (1980) rocks described in Maass et al. (1980)	Jaffrey Decay constants
x	Tonalite, Biron dam VS73-21	1841 ± 10	zircon fraction	TIMS? University of Kansas,	U-Pb upper intercept	1841	10	Sims et al., 1989;	1 , concordia intercept ages by W. R. Schmus (unpublisheddata); published in Sims et al 1989
x	Tonalite near Mosinee VS82-102	1839 ± 18	zircon fraction	TIMS? University of Kansas,	U-Pb upper intercept	1839	18	Sims et al., 1989;	1 , concordia intercept ages by W. R. Schmus (unpublisheddata); published in Sims et al 1989
x	Tonalite, Grandfather dam W314	1838± 6	zircon fraction	TIMS? University of Kansas,	U-Pb upper intercept	1838	6	Sims et al., 1989;	1 , concordia intercept ages by W. R. Schmus (unpublisheddata); published in Sims et al 1989
x	Dacite dike, Pittsville quarry VS74-2	1837 ± 9	zircon fraction	TIMS? University of Kansas,	U-Pb upper intercept	1837	9	Sims et al., 1989;
x	Tonalite gneiss at March Rapids VS86-4	1837 ± 10	zircon fraction	TIMS? University of Kansas,	U-Pb upper intercept	1837	10	Sims et al., 1989;	1 , concordia intercept ages by W. R. Schmus (unpublisheddata); published in Sims et al 1989
x	Kalinke quartz monzonite VS73-16	1836 ± 13	zircon fraction	TIMS? University of Kansas,	U-Pb upper intercept	1836	13	Sims et al., 1989;	1 , concordia intercept ages by W. R. Schmus (unpublisheddata); published in Sims et al 1989
x	Rhyolite Microporphyry, Wausau VS73-17	1836 ± 11	zircon fraction	TIMS? University of Kansas,	U-Pb upper intercept	1836	11	Sims et al., 1989;	1 , concordia intercept ages by W. R. Schmus (unpublisheddata); published in Sims et al 1989
x	Granite, Black River Falls VS73-22	1835 ± 6	zircon fraction	TIMS? University of Kansas,	U-Pb upper intercept	1835	6	Sims et al., 1989;	1 , concordia intercept ages by W. R. Schmus (unpublisheddata); published in Sims et al 1989
x	Spikehorn Creek Granite	1835 ± 6	zircon fraction	TIMS?	U-Pb upper intercept	1835	6	Sims et a l . ( 1 9 8 5 ~
x	Rutile, Big Falls amphibolite VS78-6	1835 ± 10	zircon fraction	TIMS? University of Kansas,	U-Pb upper intercept	1835	10	Sims et al., 1989;	1 , concordia intercept ages by W. R. Schmus (unpublisheddata); published in Sims et al 1989
	quartz monzonite “stitching” pluton MI-4	1833.2 ± 5.7 Ma	Zircon	sensitive high-resolution ion microprobe (SHRIMP II) U–Pb geochronology at the Geo- logical Survey of Canada, Ottawa (GSC).	207Pb/206Pb age for 9 spots on 9 zircon grains of 1833 ± 6 Ma (MSWD = 1.5; Fig. 4B),	1833.2	5.7	Schneider et al. (2002),	Most fore- land deformation and metamorphism of the Penokean orogeny must have occurred in the 15 m.y. time span from the start of the deposition of the Baraga Group until the emplacement of post-tectonic granite plutons at about 1833 Ma (Schneider et al., 2002).
x	Granite, Rock Township VS74-68	1833 ± 4	zircon fraction	TIMS? University of Kansas,	U-Pb upper intercept	1833	4	Sims et al., 1989;	1 , concordia intercept ages by W. R. Schmus (unpublisheddata); published in Sims et al 1989
x	Foliated tonalite near Greenwood VS80-1	1831 ± 7	zircon fraction	TIMS? University of Kansas,	U-Pb upper intercept	1831	17	Sims et al., 1989;	1 , concordia intercept ages by W. R. Schmus (unpublisheddata); published in Sims et al 1989
	Beecher Formation 190615-4	1842 ± 15 Ma	zircon	SHRIMP Curtin Univerisity	Pb/Pb mean date of 1827±14Ma (MSWD = 1.20, N=14), using only 8 old symmetric analyses, 1842 ± 15 Ma	1827	14	Zi et al 2021	dates as young as ca. 1778 Ma probably reflect post-magmatic distur- bance of zircon U-Pb systematics unless otherwise specified, only analyses having discordance within ± 5% and f206 <1%
x	Younger cross cutting dikes	1824 ± 25	zircon fraction	Nier type Mass Spec	Upper intercept U-Pb (Appears that this fitted through samples that are then expanded upon in Sims et al 1989)	1824	25	Van Schmus (1980) rocks described in Maass et al. (1980)	Jaffrey Decay constants
x	metadiabase dikes at Biron dam BDA1-03	1815 ± 7 Ma	zircon	SIMS National Ion Microprobe Facility at the University of California, Los Angeles.	weighted mean 207Pb/206Pb age of 1815 ± 5 Ma (MSWD: 0.52) -total of 14 spots on twelve zircon grains from sample BDA1-03	1815	5	Holm et al. (2020),	No external uncertainty. Errors on individual spot ages are reported at the 1σlevel and weighted mean ages are presented at the 95% level of confidence (2σlevel) based on the 207Pb/206Pb isotopic ratios.
1	metadiabase dikes at Biron dam BDA3-03	1815 ± 7 Ma	zircon	SIMS National Ion Microprobe Facility at the University of California, Los Angeles.	weighted mean 207Pb/206Pb age A total of 13 spots on ten zircon grains from BDA3-03 -->mean 207Pb/206Pb age of 1815 ± 7 Ma (MSWD: 0.86)	1815	7	Holm et al. (2020),	No external uncertainty. Errors on individual spot ages are reported at the 1σlevel and weighted mean ages are presented at the 95% level of confidence (2σlevel) based on the 207Pb/206Pb isotopic ratios.
1	metadiabase dikes at Biron dam BDA2-03	1817 ± 4 Ma	zircon	SIMS National Ion Microprobe Facility at the University of California, Los Angeles.	weighted mean 207Pb/206Pb age of 1817 ± 4 Ma (MSWD: 0.44) for all 15 spots	1814	4	Holm et al. (2020),	No external uncertainty. Errors on individual spot ages are reported at the 1σlevel and weighted mean ages are presented at the 95% level of confidence (2σlevel) based on the 207Pb/206Pb isotopic ratios.
x	Hines Quartz Diorite 147-85, 150-85	1812 ± 3.6	zircon fraction	TIMS? University of Kansas,	U-Pb upper intercept	1812	3.6	Sims et al., 1989;	7, concordia intercept ages by Z. E. Peterman (unpublished data).
	Late tonalite in Hillman migmatite	1800 ± 04	single zircon?	ID-TIMS University of Kansas, Lawrence, Kansa	upper concordia intercept ages	1800	4	Holm et al 2005	GSA Data Repository item 2005057, isotope dilution (TIMS) U-Pb zircon data for samples from Minnesota, Wisconsin, and Michigan and 40Ar/39Ar analytical data for incremental heating experiments, east-central Minnesota, is available on the Web at http://www.geosociety.org/pubs/ft2005.htm
	younger suite and represents post-orogenic rhyolite and granite.	1790 ±25 Ma	zircon fraction	?	?	1790	25	Van Schmus (1976)	Data from unpublished work of mine in progress (Note, "Penokean accretion 1875–1835 Van Schmus (1976)" not supported directly")
x	Granite near Lugerville VS77-251	1773 ± 8	zircon fraction	TIMS? University of Kansas,	U-Pb upper intercept	1773	8	Sims et al., 1989;	1 , concordia intercept ages by W. R. Schmus (unpublisheddata); published in Sims et al 1989
x	Granite, Rock Carry Rapids VS79-85	1768 ± 11	zircon fraction	TIMS? University of Kansas,	U-Pb upper intercept	1768	11	Sims et al., 1989;	1 , concordia intercept ages by W. R. Schmus (unpublisheddata); published in Sims et al 1989
x	Granite, Radisson VS73-37	1765 ± 6	zircon fraction	TIMS? University of Kansas,	U-Pb upper intercept	1765	6	Sims et al., 1989;	1 , concordia intercept ages by W. R. Schmus (unpublisheddata); published in Sims et al 1989
x	Rhyolite and plutonic rocks	1,760 ± 10 m.y.	zircon fraction	Nier type Mass Spec	Upper intercept U-Pb (Appears that this fitted through samples that are then expanded upon in Sims et al 1989)	1760	10	Van Schmus (1980) rocks described in Maass et al. (1980)	Jaffrey Decay constants
	Hamilton Mounds granite. LGM-HM3	1760 ± 12 Ma	single zircon	ID-TIMS (IGL), University of Kansas	upper intercept single-grain	1760	12	Medaris et al. (2007),
x	Amberg quartz monzonite VS73-8	1752 ± 8	zircon fraction	TIMS? University of Kansas,	U-Pb upper intercept	1752	8	Sims et al., 1989;	ages recalculated from original reference, Van Schmus (1980) by Sims et al., 1989
x	Granite near Monico VS73-1l	1739 ± 8	zircon fraction	TIMS? University of Kansas,	U-Pb upper intercept	1739	8	Sims et al., 1989;	ages recalculated from original reference, Van Schmus (1980) by Sims et al., 1989
x	Wolf River River -anorogenic granite	1,469 ± 28	unknown	unknown	unknown	1469	28	Recalculated by Sims (1990) from data from Van Schmus and others 1975

## Sheet: Penokean Metamorphic
<0.5% discordant?	location	formation or unit	age	mineral	Method	Age calculation	Reported age	Uncertainty	reference	Notes
	Superior	Chocolay Group, the basal group of the Marquette Range Supergroup, in Michigan, Wis- consin and the Mille Lacs and North Range Groups in Minnesota.	1861 ± 10 (n = 9)	metamorphic Xenotime	SHRIMP U–Pb geochronology.	207Pb/206Pb age weighted mean average	1861	10	Vallini et al. (2007),	The probability curve of concordant data (>90% concordance
	Western orogen (Minnesota)	gt + st schist PO-23	1844 ± 7	metamorphic monazite	EMPA analyse	Total Pb age	1844	7	Holm et al., 2007
	Central orogen (Wisconsin)	ky schist P-K	1844 ± 9	metamorphic monazite	EMPA analyse	Total Pb age	1844	9	Holm et al., 2007
	Central orogen (Wisconsin)	gt schist BH-1-200c	1831 ± 6	metamorphic monazite	EMPA analyse	Total Pb age	1831	6	Holm et al., 2007 Re-calculated data presented in Schneider et al. (2004).
	Western orogen (Minnesota)	gt + st schist KRc	1829 ± 5	metamorphic monazite	ion microprobe analyses	Pb/Pb age determined from	1829	5	Holm et al., 2007 Re-calculated data presented in Schneider et al. (2004).
	Eastern orogen (Michigan	Archean schist FCc	1829 ± 5	metamorphic monazite	ion microprobe analyses	Pb/Pb age determined from	1829	5	Holm et al., 2007 Re-calculated data presented in Schneider et al. (2004).
	Eastern orogen (Michigan	mica schist PVD	1828± 7	metamorphic monazite	ion microprobe analyses	Pb/Pb age determined from	1828	7	Holm et al., 2007
	Central orogen (Wisconsin)	ky schist P-K	1819± 3	metamorphic monazite	ion microprobe analyses	Pb/Pb age determined from	1819	3	Holm et al., 2007
	Central orogen (Wisconsin)	ky + st schist RI-3-472c	1817± 7	metamorphic monazite	EMPA analyse	Total Pb age	1817	7	Holm et al., 2007 Re-calculated data presented in Schneider et al. (2004).
	Superior	Jackson Mine	1810 ± 18	Monazite intergrown	Western Australia sensitive high-resolution ion microprobe (SHRIMP) II,	Mean 207Pb/206Pb age of 1810 ± 18 Ma (mean square of weighted deviates [MSWD] = 0.6; n = 14).	1810	18	Rasmussen et al. (2016),	Rasmussen, B., Zi, J.-W., Sheppard, S., Krapež, B., and Muh- ling, J.R., 2016, Multiple episodes of hematite miner- alization indicated by U-Pb dating of iron-ore deposits, Marquette Range, Michigan, USA: Geology, v. 44, no. 7, p. 547–550, https://doi.org/10.1130/G37783.1.
	Central orogen (Wisconsin)	mica schist 96-17	1799± 3	metamorphic monazite	ion microprobe analyses	Pb/Pb age determined from	1799	3	Holm et al., 2007
	Superior	Negaunee Iron Formation	1796 ± 17	monazite in hematite-rich ore	Western Australia sensitive high-resolution ion microprobe (SHRIMP) II,	207Pb/206Pb age of 1796 ± 17 Ma (MSWD = 1.5; n = 13; Fig. 3)	1796	17	Rasmussen et al. (2016),	Rasmussen, B., Zi, J.-W., Sheppard, S., Krapež, B., and Muh- ling, J.R., 2016, Multiple episodes of hematite miner- alization indicated by U-Pb dating of iron-ore deposits, Marquette Range, Michigan, USA: Geology, v. 44, no. 7, p. 547–550, https://doi.org/10.1130/G37783.1.
	Western orogen (Minnesota)	gt + st schist KRc	1793± 4	metamorphic monazite	ion microprobe analyses	Pb/Pb age determined from	1793	4	Holm et al., 2007 Re-calculated data presented in Schneider et al. (2004).
	Central orogen (Wisconsin)	ky schist P-K	1791± 6	metamorphic monazite	ion microprobe analyses	Pb/Pb age determined from	1791	6	Holm et al., 2007
	Central orogen (Wisconsin)	ky + st schist LM-1-1082c	1790± 10	metamorphic monazite	EMPA analyse	Total Pb age	1790	10	Holm et al., 2007 Re-calculated data presented in Schneider et al. (2004).
	Western orogen (Minnesota)	gt + st schist PO-23	1788± 4	metamorphic monazite	EMPA analyse	Total Pb age	1788	4	Holm et al., 2007
	Superior	The younger Baraga Group in Michi- gan and the Animikie Group in Minnesota,	1786 ± 4 (n = 32)	metamorphic Xenotime	SHRIMP U–Pb geochronology.	207Pb/206Pb age weighted mean average	1786	4	Vallini et al. (2007),	The probability curve of concordant data (>90% concordance
	Eastern orogen (Michigan	Archean gneiss CREP	1788± 14	metamorphic monazite	EMPA analyse	Total Pb age	1780	14	Holm et al., 2007
	Central orogen (Wisconsin)	gt schist 5-79-12c	1779± 8	metamorphic monazite	EMPA analyse	Total Pb age	1779	8	Holm et al., 2007 Re-calculated data presented in Schneider et al. (2004).
	Western orogen (Minnesota)	bio gneiss S-2	1777± 3	metamorphic monazite	ion microprobe analyses	Pb/Pb age	1777	3	Holm et al., 2007
	Western orogen (Minnesota)	gt + st schist P-16	1776± 4	metamorphic monazite	EMPA analyse	Total Pb age	1776	4	Holm et al., 2007
	Pembine-Wasau	Beecher Formation 190615-4	1775 ± 25 Ma	Monazite	SHRIMP Curtin Univerisity	Among the 12 concordant or near-concordant analyses with relatively low-common Pb, ten yielded a weighted mean 207Pb/206Pb date of 1775 ± 25 Ma (MSWD = 0.27), whereas the other two analyses give significantly younger dates of 1617±50Ma and 1471±66Ma (1σ) and are treated as outliers (Fig. 4C).	1775	25	Zi et al 2021	unless otherwise specified, only analyses having discordance within ± 5% and f206 <1%
	Eastern orogen (Michigan	Archean gneiss HRR	1774± 7	metamorphic monazite	EMPA analyse	Total Pb age	1774	7	Holm et al., 2007
	Eastern orogen (Michigan	st schist MIST	1768± 13	metamorphic monazite	EMPA analyse	Total Pb age	1768	13	Holm et al., 2007
	Central orogen (Wisconsin)	gt schist BH-1-200c	1764± 8	metamorphic monazite	EMPA analyse	Total Pb age	1764	8	Holm et al., 2007 Re-calculated data presented in Schneider et al. (2004).
	Western orogen (Minnesota)	st schist MN-29	1759± 6	metamorphic monazite	EMPA analyse	Total Pb age	1759	6	Holm et al., 2007
	Central orogen (Wisconsin)	gt + sil schist BL-2-252c	1759± 13	metamorphic monazite	EMPA analyse	Total Pb age	1759	13	Holm et al., 2007 Re-calculated data presented in Schneider et al. (2004).
	Eastern orogen (Michigan	st schist MIST	1758± 5	metamorphic monazite	ion microprobe analyses	Pb/Pb age determined from	1758	5	Holm et al., 2007
	Western orogen (Minnesota)	bio gneiss S-2	1756± 5	metamorphic monazite	EMPA analyse	Total Pb age	1756	5	Holm et al., 2007
	Central orogen (Wisconsin)	gt schist HS-4	1744± 3	metamorphic monazite	ion microprobe analyses	Pb/Pb age determined from	1744	3	Holm et al., 2007
	Western orogen (Minnesota)	st schist AM-016	1741±4	metamorphic monazite	EMPA analyse	Total Pb age	1741	4	Holm et al., 2007
	Central orogen (Wisconsin)	gt + sil schist PF-2-311c	1729±11	metamorphic monazite	EMPA analyse	Total Pb age	1729	11	Holm et al., 2007 Re-calculated data presented in Schneider et al. (2004).
