# Supplementary material for: Volcanism takes a back seat driving global iron deposition after the Great Oxidation Event
Source: Research Square preprint supplement (doi:10.21203/rs.3.rs-3857865/v1), 2024-01-22
Supplement: Supplementary file 2 [file 1390324cbf6ba2f14e7d7ac7.xlsx]

## Sheet:  Fralick et al 2001 ID-TIMS
sample	Weight (mg)	U (ppm)	Th/U	Pbcom (pg)	207Pb/Pb204	206Pb/238U	2sigma (abs)	207Pb/235U	2sigma (abs)	207Pb/206Pb AGE (MA)	2sigma (internal)	discordance (%)	Correlation coeff
brn,euh	0.005	67	0.37	0.71	1185.3	0.3381	0.0008	5.353	0.013	1877.3	2.5	0	0.835	Note: The only one <0.5% discordnce
clr, euh	0.005	90	0.41	0.84	3164.6	0.492	0.0011	12.76	0.031	2725.4	1.9	6.5	0.8831	not included
brn, euh, incl	0.005	77	0.39	0.72	1348.8	0.3368	0.0012	5.34	0.021	1880.1	3	0.6	0.9078	not included
brn, euh	0.002	95	0.37	0.68	672.4	0.3173	0.0011	5.03	0.018	1879.3	3.4	6.3	0.8466	not included
brn, euh	0.0015	35	0.38	0.34	407.4	0.3357	0.0017	5.32	0.03	1879.1	4.2	0.8	0.9108	not included
brn, euh, incl	0.004	80	0.36	0.61	1311.8	0.334	0.0009	5.285	0.015	1876	3	1.1	0.8227	not included
All zircons abraded prior to analysis (Krogh, 1982); clr, colourless; brn, browish; incl, acicular inclusions; euh, euhedral. Weights and derived U 208 206 207 206 concentrations are based on visual estimates and are probably accurate to about ±50%. Th/U is estimated from Pb/ Pb ratio and Pb/ Pb age. Pbcom is total measured common Pb assuming the isotopic composition of laboratory blank: 206/204 …
Note from Black et al., 2003:
However, the accuracy of the 206Pb/238U age is essentially controlled by the spike calibration 2j uncertainty of 0.26%, which is much larger than the measurement uncertainty of 0.06%. The spike-calibration uncertainty gives an accuracy of F1.1 Ma for the 206Pb/238U age, putting it in better agreement with the 207Pb/206Pb age. Taking into ac- count the 2j uncertainties in the decay constants for 2…
https://www.sciencedirect.com/science/article/pii/S0009254103001669?casa_token=bMv7UJx9u00AAAAA:5Zzs_Z8LaxQneDRFKXgjgRdYCz2jytpokl9D_6_le3eYKnd9EwFLdMXA2XCCVvdTo5yryuA9#FIG5
Calculated from isoplot:
238U/235U ratio:		137.818	+/- 0.0225
t75	s(t75)	t68	s(t68)	t(76)	s(t76)	tconc	s(tconc)
1877.37	1.0389	1877.52	1.927	1877.2	1.2422	1877.31	0.915
* 1s uncertainties
WITH EXTERNAL UNCERTAINTIES PROPOGATED
238U/235U ratio:		137.818	+/- 0.0225
t75	s(t75)	t68	s(t68)	t(76)	s(t76)	tconc	s(tconc)
1877.37	1.6464	1877.52	2.1732	1877.2	3.1786	1877.4	1.5643
* 1s uncertainties

## Sheet: Hulburt et al 2005 ID-TIMS
W106-06
Setting Lake Pyroxenite								%		%		%
sample	Weight (mg)	U (ppm)	Pb(ppm)	Th/U	Pbcom (pg)	206Pb/Pb204	206Pb/238U	1sigma	207Pb/235U	1sigma	207Pb/206Pb	1sigma	207Pb/206Pb AGE (MA)	two sigma (internal)	Discordia
B2	4	54	21	0.693	2	2199	0.3379	0.11	5.35	0.12	0.11483	0.06	1877.2	2.1	0.03
Notes: Details of
1 Measured ratio,
2 Total common Pb in analysis in picograms, corrected for fractionation and spike
3 Model Th/U calculated from radiogenic 208Pb/206Pb ratio and 207Pb/206Pb age, assuming concordance 4 Corrected for spike, blank, and common Pb
5 Errors for age are ±2 sigma errors in Ma
6 Discordance along a chord to the origin
238U/235U ratio:		137.818	+/- 0.0225
t75	s(t75)	t68	s(t68)	t(76)	s(t76)	tconc	s(tconc)
1876.89	2.0532	1876.56	3.5818	1876.41	2.163	1877.06	1.7671
* 2s uncertainties
with EXTERNAL
238U/235U ratio:		137.818	+/- 0.0225
t75	s(t75)	t68	s(t68)	t(76)	s(t76)	tconc	s(tconc)
1876.89	3.2767	1876.56	4.1063	1876.41	6.2378	1876.79	3.0747
X=07/35 err[X] Y=06/38 err[Y] Z=07/06 err[Z]
in which the error correlations are calculated from the redundancies between the three sets of uncertainties.
Note from Black et al., 2003:
However, the accuracy of the 206Pb/238U age is essentially controlled by the spike calibration 2j uncertainty of 0.26%, which is much larger than the measurement uncertainty of 0.06%. The spike-calibration uncertainty gives an accuracy of F1.1 Ma for the 206Pb/238U age, putting it in better agreement with the 207Pb/206Pb age. Taking into ac- count the 2j uncertainties in the decay constants for 2…
https://www.sciencedirect.com/science/article/pii/S0009254103001669?casa_token=bMv7UJx9u00AAAAA:5Zzs_Z8LaxQneDRFKXgjgRdYCz2jytpokl9D_6_le3eYKnd9EwFLdMXA2XCCVvdTo5yryuA9#FIG5

## Sheet: Heaman et al 2009 ID-TIMS
ID-TIMS
sample	Weight (mg)	U (ppm)	Th(ppm)	Pb(ppm)	Th/U	Pbcom (pg)	207Pb/Pb204	206Pb/238U	1sigma abs	207Pb/235U	1sigma abs	207Pb/206Pb	1sigma abs	206/238 age	discordance (%)
KNT99-02 (Bear Island dyke, Sipiwesk Lake)
1 z, col lg frag 1M (1)	27.8	69	26	25	0.38	22	1822	0.3349	0.0013	5.264	0.019	0.114	0.0002	1862±6	0.1	The three concordant fractions #1, 2, and 4 have slightly younger 207Pb/206Pb ages of 1864, 1871, and 1880Ma, respectively and are interpreted to have experienced some Pb-loss during peak THO metamorphism at about 1800 Ma.
2 z, col frag 1M (1)	15.8	89	39	34	0.44	40	756	0.3355	0.0007	5.294	0.013	0.1144	0.0002	1865±3	0.3	The three concordant fractions #1, 2, and 4 have slightly younger 207Pb/206Pb ages of 1864, 1871, and 1880Ma, respectively and are interpreted to have experienced some Pb-loss during peak THO metamorphism at about 1800 Ma.
4 z, col frag 1M (10)	69.9	59	23	22	0.39	42	2089	0.3384	0.0006	5.366	0.011	0.115	0.0001	1879±3	0	10 zircon grains, one zircon fraction
z = zircon, b = baddeleyite, t = titanite, col = colourless, yel = yellow, brn = brown, lt = light, dk = dark, lg
Number in parentheses correspond to the number of grains analysed. MIH refers to Methylene Iodide Heavy Concentrate. Atomic ratios corrected for spike, estimated blank, and initial common lead (Stacey and Kramers, 1975).
All errors reported in this table are quoted at 1 sigma.
238U/235U ratio:		137.818	+/- 0.0225
t75	s(t75)	t68	s(t68)	t(76)	s(t76)	tconc	s(tconc)
1863.04	3.0799	1862.09	6.2779	1863.32	3.1673	1863.56	2.2961
1867.9	2.0972	1864.98	3.3789	1869.64	3.1538	1868.24	2.0796
1879.44	1.7545	1878.97	2.8899	1879.07	1.5669	1879.77	1.4307
* 1s uncertainties
The U–Pb results for six zircon fractions from this coarse-grained gabbro sample of the Bear Island dyke are presented in Table 2 and on a concordia diagram in Fig. 5A. A modest amount of colourless to faint pink zircon shards and fragments were recovered. The selected fractions consisted of two single fragments (#1, 2) and four small multi-grain aliquots. In general, the Bear Island gabbro zirco…
X=07/35 err[X] Y=06/38 err[Y] Z=07/06 err[Z]
in which the error correlations are calculated from the redundancies between the three sets of uncertainties.
Note from Black et al., 2003:
However, the accuracy of the 206Pb/238U age is essentially controlled by the spike calibration 2j uncertainty of 0.26%, which is much larger than the measurement uncertainty of 0.06%. The spike-calibration uncertainty gives an accuracy of F1.1 Ma for the 206Pb/238U age, putting it in better agreement with the 207Pb/206Pb age. Taking into ac- count the 2j uncertainties in the decay constants for 2…
https://www.sciencedirect.com/science/article/pii/S0009254103001669?casa_token=bMv7UJx9u00AAAAA:5Zzs_Z8LaxQneDRFKXgjgRdYCz2jytpokl9D_6_le3eYKnd9EwFLdMXA2XCCVvdTo5yryuA9#FIG5
WITH EXTERNAL UNCERTAINTIES
238U/235U ratio:		137.818	+/- 0.0225
t75	s(t75)	t68	s(t68)	t(76)	s(t76)	tconc	s(tconc)
1863.04	3.3305	1862.09	6.3564	1863.32	4.3067	1863.39	2.9735
1867.9	2.4522	1864.98	3.5231	1869.64	4.2992	1867.56	2.4289
1879.44	2.171	1878.97	3.0598	1879.07	3.3199	1879.43	2.1697
* 1s uncertainties

## Sheet: Holm et al 2005  ID-TIMS
ID-TIMS
	location	formation or unit	age	system	mineral	Analyses	Reported age	Uncertainty	reference	Notes
	Penokean plutons	Bradbury Creek granodiorite	1877 ± 15	upper concordia intercept ages	single zircon	ID-TIMS University of Kansas, Lawrence, Kansa	1877	15	Holm et al 2005	GSA Data Repository item 2005057, isotope dilution (TIMS) U-Pb zircon data for samples from Minnesota, Wisconsin, and Michigan and 40Ar/39Ar analytical data for incremental heating experiments, east-central Minnesota, is available on the Web at http://www.geosociety.org/pubs/ft2005.htm
EARTHTIME Spike < 0.03% (95% confidence)
		Actually percentages… not abs		Actually percentages… not abs			Actually percentages… not abs
	207Pb*/235U	± 2s(abs)	206Pb*/238U	± 2s(abs)	correlation coefficient	207Pb*/206	± 2s(abs)	discordance
MN00-01: Bradbury Creek granodiorite
a. M(-1) #78 0.004 68 32 176 5.1650 0.70 0.32746 0.63 0.915 0.11440 0.28 1826 11 1847 13 1870 5	5.165	0.7	0.32746	0.63	0.915	0.1144	0.28	2.35294	not included
b. M(-1) #79 0.001 148 105 72 5.3481 0.81 0.33725 0.70 0.884 0.11501 0.38 1873 13 1877 15 1880 7	5.3481	0.81	0.33725	0.7	0.884	0.11501	0.38	0
c. M(-2) #v7 0.003 162 60 502 4.9742 0.64 0.31352 0.59 0.936 0.11507 0.22 1758 10 1815 12 1881 4	4.9742	0.64	0.31352	0.59	0.936	0.11507	0.22	6.53907	not included
238U/235U ratio:		137.818	+/- 0.0225
t75	2 s(t75)	t68	2 s(t68)	t(76)	2 s(t76)	tconc	s(tconc)
1876.59	6.929	1873.43	11.3803	1880.09	6.8285	1878.39	5.9648
* 2s uncertainties
WITH EXTERNAL UNCERTAINTIES
1876.59	7.3845	1873.43	11.5556	1880.09	8.9948	1877.57	7.0483

## Sheet: Zi et al., 2022 (SHRIMP)
Penokean
SHRIMP
META-RHYODACITE SAMPLE 190615-2 FROM THE BEECHER FORMATION																			MEANS															With external uncertainties
Main group (1842 ±7 Ma, n = 32, MSWD = 0.98)											238U/235U ratio:		137.818	+/- 0.0225					206/238							207/206								238U/235U ratio:		137.818	+/- 0.0225
	207Pb*/235U	± 1s(abs)	206Pb*/238U	± 1s(abs)	†207Pb*/206	± 1s(abs)	Disc (%)§				t75	s(t75)	t68	s(t68)	t(76)	s(t76)	tconc	s(tconc)		238U/206Pb Weighted Mean	uncertainty Sx	N	MSWD	Total uncertainty Stotal with external uncertainties	Total With systematic uncertainties (~1%)	Age	Sx	N	MSWD	Total uncertainty Stotal with external uncertainties	Total With systematic uncertainties (~1%)			t75	s(t75)	t68	s(t68)	t(76)	s(t76)	tconc	s(tconc)
1615I.1-2a	5.31	0.12	0.337	0.007	0.1143	0.001	0				1870.47	19.31	1872.22	33.751	1868.07	15.786	1869.19	14.345		1833.4	24.884	6	0.557	24.961	30.9707	1844.48	15.792	6	0.81	16.829	24.9685			1870.47	19.352	1872.22	33.766	1868.07	16.054	1869.2	14.532
1614E.1-2	5.12	0.1	0.329	0.005	0.1127	0.0015	0				1839.43	16.591	1833.53	24.253	1842.59	24.089	1839.85	16.583					With external uncertainties											1839.43	16.638	1833.53	24.273	1842.59	24.264	1839.81	16.636
1615G.1-2	5.15	0.13	0.331	0.008	0.1126	0.0009	0				1844.39	21.463	1843.23	38.746	1840.98	14.469	1845.39	13.411												With external uncertainties				1844.39	21.5	1843.23	38.759	1840.98	14.758	1845.37	13.637
1615I.1-2	5.11	0.12	0.33	0.007	0.1123	0.0014	0				1837.77	19.942	1838.38	33.928	1836.15	22.581	1837.5	17.874																1837.77	19.981	1838.38	33.943	1836.15	22.767	1837.49	17.97
1614B.1-2	5.07	0.11	0.328	0.006	0.1121	0.0011	0				1831.1	18.401	1828.68	29.125	1832.92	17.781	1832.58	15.891																1831.1	18.443	1828.68	29.142	1832.92	18.016	1832.54	16.027
1614F.1-1	4.86	0.16	0.322	0.006	0.1095	0.003	0				1795.35	27.724	1799.49	29.258	1790.29	49.904	1797.16	25.011																1795.35	27.751	1799.49	29.273	1790.29	49.987	1797.16	25.024
† All Pb isotope data and t[207Pb/206Pb] have been corrected for common Pb.
§Disc. is apparent discordance, as 100∙( t[207Pb/206Pb] - t[206Pb/238U]) / t[207Pb/206Pb].
META-DACITE SAMPLE 190615-4 FROM THE BEECHER FORMATION
Age spreading from ca. 1850 Ma to 1780 Ma
	207Pb*/235U	± 1s(abs)	206Pb*/238U	± 1s(abs)	†207Pb*/206	± 1s(abs)	Disc (%)§	†207Pb*/206 Age	± 1s
1527A.1-1	5	0.1	0.325	0.005	0.1115	0.0015	0	1823	25
																																		With external uncertainties
																			MEANS															238U/235U ratio:		137.818	+/- 0.0225
SHRIMP U-PB DATA FOR ZIRCON IN THE DUNBAR GNEISS SAMPLE 190615-5											238U/235U ratio:		137.818	+/- 0.0225					206/238							207/206								t75	s(t75)	t68	s(t68)	t(76)	s(t76)	tconc	s(tconc)
Main group (1845 ±7 Ma; n = 17, MSWD = 1.02)											t75	s(t75)	t68	s(t68)	t(76)	s(t76)	tconc	s(tconc)		238U/206Pb Weighted Mean	uncertainty Sx (2s)	N	MSWD	With propagated uncertainty isoplot (2s)	Total With systematic uncertainties (~1%)	Age	Sx (2s)	N	MSWD	With propagated uncertainty isoplot (2s)	Total With systematic uncertainties (~1%)			1859.15	24.441	1857.74	43.503	1858.56	17.718	1860.29	16.383
	207Pb*/235U	± 1s(abs)	206Pb*/238U	± 1s(abs)	†207Pb*/206	± 1s(abs)	Disc (%)§				1859.15	24.408	1857.74	43.492	1858.56	17.476	1860.31	16.199		1843.89	46.388	3	0.86	46.43	49.9574	1844.7	22.506	3	0.66	23.246	29.6761			1842.74	23.186	1843.23	38.759	1840.98	19.51	1842.37	17.976
1611H.1-5	5.24	0.15	0.334	0.009	0.1137	0.0011	0				1842.74	23.152	1843.23	38.746	1840.98	19.292	1842.38	17.826					With external uncertainties							With external uncertainties				1829.43	23.491	1833.53	38.817	1826.44	22.913	1826.97	19.954
1611H.1-1	5.14	0.14	0.331	0.008	0.1126	0.0012	0				1829.43	23.458	1833.53	38.805	1826.44	22.729	1826.95	19.846
1612F.3-2	5.06	0.14	0.329	0.008	0.1117	0.0014	0				1s uncertainty
Include this single analyses?
NEWINGHAM TONALITE SAMPLE 190615-6
Main age (1847±10 Ma, n = 12, MSWD = 0.64)											238U/235U ratio:		137.818	+/- 0.0225						238U/235U ratio:		137.818	+/- 0.0225
	207Pb*/235U	± 1s(abs)	206Pb*/238U	± 1s(abs)	†207Pb*/206	± 1s(abs)	Disc (%)§	†207Pb*/206 Age	± 1s		t75	s(t75)	t68	s(t68)	t(76)	s(t76)	tconc	s(tconc)		t75	s(t75)	t68	s(t68)	t(76)	s(t76)	tconc	s(tconc)
1618C.1-3	4.91	0.16	0.332	0.011	0.1125	0.0007	0	1839	12		1803.98	27.489	1848.07	53.236	1839.38	11.266	1760.93	10.995		1803.98	27.517	1848.07	53.245	1839.38	11.634	1761.16	11.292
											* 1s uncertainties									* 1s uncertainties
X=07/35 err[X] Y=06/38 err[Y] Z=07/06 err[Z] in which the error correlations are calculated from the redundancies between the three sets of uncertainties.																				EXTERNAL uncetainties
											207/206
											Age	Sx (2s)	N	MSWD	With propagated uncertainty isoplot (2s)	Total With systematic uncertainties (~1%)
											1839.38	22.532	1		23.268	29.6602

## Sheet: SHRIMP Rasmussen 2016
SHRIMP U–Pb data																No coherent young concordant population
lower tuff bed (drill-hole TDH26, 386.38-.46 m).							only internal uncertainties
	207Pb*/206Pb*	± 1s(abs)	206Pb*/238U	± 1s(abs)	Discordant (%)		t75	s(t75)	t68	s(t68)	t(76)	s(t76)	tconc	s(tconc)	Apparent discordance %
1132J1.2	0.1139	0.0011	0.3331	0.0055	0		1857.33	8.38	1853.39	2.95	1861.7	17.4	1853.62	2.91	-0.446366
1103C.1-2	0.1157	0.0009	0.3419	0.0044	0		1893.04	6.8	1895.8	2.47	1890	14	1895.63	2.43	0.306878
1103B1.1	0.1159	0.0012	0.3425	0.0059	0		1896.02	9.06	1898.69	3.32	1893.1	18.6	1898.51	3.27	0.295283
1132M1.1	0.1171	0.0009	0.3441	0.0054	0		1908.88	6.8	1906.36	3.07	1911.6	13.8	1906.61	2.99	-0.274116
TDH26, 374.45-.55 m							t75	s(t75)	t68	s(t68)	t(76)	s(t76)	tconc	s(tconc)
1105C.1-1	0.1125	0.0042	0.33202	0.0071	0		1844	31.8	1848.16	3.79	1839.4	67.6	1848.14	3.78	-0.476242
1134N1.1	0.1146	0.0018	0.3375	0.0054	0		1873.8	13.5	1874.63	2.96	1872.8	28.3	1874.61	2.95	-0.0977147	No coherent young concordant population
1134A1.1	0.1175	0.001	0.345	0.0056	0		1914.07	7.52	1910.68	3.19	1917.7	15.3	1910.97	3.13	0.366064
