# Supplementary material for: Volcanism takes a back seat driving global iron deposition after the Great Oxidation Event
Source: Research Square preprint supplement (doi:10.21203/rs.3.rs-3857865/v1), 2024-01-22
Supplement: Supplementary file 3 [file 59b010dfd36603ccd004914d.xlsx]

## Sheet: Fig 3a-Revised Post-GOE IF
Region	Group	Formation	Thickness (m)	Area (m^2)	Age	uncertainty	Min age	max age	stratigraphic height of age	Age Notes	Age references	Additional Notes (thickness/area)
Northwest Territories, Canada	Kahochella Gp	Gibraltar Formation	10	7.97255e+08			1850	1883	min-max	As presented in Bowring et al 1984. Gibraltar Fm constrained between 1882 ± 1 Ma (Hoffman et al., 2011) and 1865 ± 15 Ma (Bowring et al., 1984)" Bowring SA, Van Schmus WR, and Hoffman PF (1984) U–Pb zircon ages from Athapuscow aulacogen, East Arm of Great Slave Lake, N.W.T. Canadian Journal of Earth Sciences 21: 1315–1324.	Bowring SA, Van Schmus WR, and Hoffman PF (1984) U–Pb zircon ages from Athapuscow aulacogen, East Arm of Great Slave Lake, N.W.T. Canadian Journal of Earth Sciences 21: 1315–1324.		Roscoe SM, Gandhi SS, Charbonneau BW, Maurice YT, and Gibb RA (1987) Mineral resource assessment of the area in the East Arc (Great Slave Lake) and Artillery Lake region, N.W.T., proposed as a national park (NTS 75 J,K, L, N, O). Geological Survey of Canada, Open File 1434, 92 p.	Hoffman, P.F., Bowring, S.A., Buchwaldt, R. and Hildebrand, R.S., 2011. Birthdate for the Coronation paleocean: age of initial rifting in Wopmay orogen, Canada. Canadian Journal of Earth Sciences, 48(2), pp.281-293.
Lake Superior Region		Ironwood Iron Formation	700	3.80829e+08	1886	2	1884	1888	500	Based on age of 1885.8±1.9(2.0)[2.8]	This paper		Reed, R.C. and Daniels, J., 1987. Bedrock geology of Northern Michigan: Michigan Department of Natural Resources. Geological Survey Division, scale, 1(500,000).	Eyster et al 2021	Cannon, W.F., LaBerge, G.L., Klasner, J.S. and Schulz, K.J., 2008. The Gogebic iron range—A sample of the northern margin of the Penokean fold and thrust belt (No. 1730). US Geological Survey.	Hotchkiss (1919). Geology of the Gogebic range and its relation to recent mining developments. Engineering and Mining Journal, 108, 443–452.	Laybourn, D. P. (1979). The geology and metamorphism of the Ironwood iron-formation, Gogebic range, Wisconsin. (Doctoral dissertation). University of Minnesota.	Prinz, W. C. (1981). Geologic map of the Gogebic range-Watersmeet area, Gogebic and Ontonagon Counties. (No. 1365).	Pufahl, P. K., & Fralick, P. W. (2004). Depositional controls on Palaeoproterozoic iron formation accumulation, Gogebic range, Lake Supe- rior region, USA. Sedimentology, 51(4), 791–808. https://doi.org/10.1111/j.1365-3091.2004.00651.x	Schmidt, R. G. (1980). The Marquette range Supergroup in the Gogebic iron district, Michigan and Wisconsin; B; 1460. U.S. Govt. Print. Off.	Sims, P. K., Peterman, Z. E., Prinz, W. C., & Benedict, F. C. (1984). Geology, geochemistry, and age of Archean and Early Proterozoic rocks in the Marinesco-Watersmeet area, northern Michigan. (Paper, 1292-A, A1–A41). US Geol. Surv. Prof.	Trent, V. A. (1973). Geologic map of the Marenisco and Wakefield NE quadrangles Gogebic County. (No. 73-280).
South Dakota		Rochford Fm	20	1.71907e+09			1855	1913	min-max	between 1.89 and 1.87 Ga (Rochford Iron Formation). Younger constraint from 1850 Ma deformation (Dahl et al., 2005 2006; and references therein). In particular, an imprecise, upper-intercept 207Pb/206Pb age of 1884 ± 29 Ma was obtained for bulk zircon in felsic tuff interlayered with the Montana Mine Formation that underlies the Rochford Formation (Redden et al., 1990), thereby constraining a max…	Dahl, P.S., et al., 2006. 2480 Ma mafic magmatism in the northern Black Hills, South Dakota: a new link connecting the Wyoming and Superior cratons. Can. J. Earth Sci. 43, 1579–1600. Dahl, P.S., Holm, D.K., Gardner, E.T., Hubacher, F.A., Foland, K.A., 1999. New constraints on the timing of Early Proterozoic tectonism in the Black Hills (South Dakota), with implications for docking of the Wyoming …	Where not thickened or thinned by folding, the formations range from 20 to 200 ft thick; the Rochford Formation can be traced along strike for more than 15 mi, the Montana Mine Formation for about 6 mi.	https://pubs.usgs.gov/bul/1580/report.pdf	Frei R, Dahl PS, Duke EF, et al. (2008) Trace element and isotopic characterization of Neoarchean and Paleoproterozoic iron formations in the Black Hills (South Dakota, USA): Assessment of chemical change during 2.9–1.9 Ga deposition bracketing the 2.4–2.2 Ga first rise of atmospheric oxygen. Precambrian Research 162: 441–474.	Redden, J.A., Peterman, Z.E., Zartman, R.E., DeWitt, E., 1990. U–Th–Pb geochronology and preliminary interpretation of Precambrian tectonic events in the Black Hills, South Dakota. In: Lewry, J.F., Stauffer, M.R. (Eds.), The Early Proterozoic Trans-Hudson orogen of North America. Geological Association of Canada Special Paper. Geological Association of Canada Special Paper, pp. 229–251.
Lake Superior Region		Gunflint Iron Formation	190	2.20287e+09	1877.52	8.74	1850	1886.26	60		Fralick, P., Davis, D.W. and Kissin, S.A., 2002. The age of the Gunflint Formation, Ontario, Canada: single zircon U-Pb age determinations from reworked volcanic ash. Canadian Journal of Earth Sciences, 39(7), pp.1085-1091.	stratigraphic height from paper	Fralick, P., Planavsky, N., Burton, J., Jarvis, I., Addison, W.D., Barrett, T.J. and Brumpton, G.R., 2017. Geochemistry of Paleoproterozoic Gunflint Formation carbonate: Implications for hydrosphere-atmosphere evolution. Precambrian Research, 290, pp.126-146.	Addison, W.D., Brumpton, G.R., Vallini, D.A., McNaughton, N.J., Davis, D.W., Kissin, S.A., Fralick, P.W. and Hammond, A.L., 2005. Discovery of distal ejecta from the 1850 Ma Sudbury impact event. Geology, 33(3), pp.193-196.
Lake Superior Region		Biwabik Iron Formation	228.6	1.60408e+10	1877.52	8.74	1850	1886.26	121	correlation with just above upper cherty	Fralick, P., Davis, D.W. and Kissin, S.A., 2002. The age of the Gunflint Formation, Ontario, Canada: single zircon U-Pb age determinations from reworked volcanic ash. Canadian Journal of Earth Sciences, 39(7), pp.1085-1091.		Hemming, S. R., McLennan, S. M., & Hanson, G. N. (1995). Geochemical and Nd/Pb isotopic evidence for the provenance of the Early Proterozoic Virginia Formation, MN: Implications for the tectonic setting of the Animikie Basin. The Journal of Geology, 103, 147–168. https://doi.org/10.1086/629733	Addison, W.D., Brumpton, G.R., Vallini, D.A., McNaughton, N.J., Davis, D.W., Kissin, S.A., Fralick, P.W. and Hammond, A.L., 2005. Discovery of distal ejecta from the 1850 Ma Sudbury impact event. Geology, 33(3), pp.193-196.	Duncanson, S., Brengman, L., Johnson, J., Eyster, A., Fournelle, J., Moy, A., 2024. Reconstructing diagenetic mineral reactions from silicified horizons of the Paleoproterozoic Biwabik Iron Formation, Minnesota. American Mineralogist.	Pufahl, P.K., 1996. Stratigraphic architecture of a Paleoproterozoic iron formation depositional system: the Gunflint, Mesabi and Cuyuna iron ranges (Doctoral dissertation).
Belcher Islands		Kipalu Formation	130	2.29613e+09			1870	--	min	The Belcher islands has been the focus of several unpublished geochron studies. Iron formation is overlain by Flaherty Fm volcanics that are associated with the Haig intrusions with U–Pb Baddelyite dates of 1870.3 ± 0.7 and 1870.1 ± 1 Ma (abstract Hamilton et al., 2009). thus the minimum age of the iron formation was taken to be 1870 Ma. The Volcanics are suggested to conformably overlie the Kipa…	Hodgskiss, M.S., Dagnaud, O.M., Frost, J.L., Halverson, G.P., Schmitz, M.D., Swanson-Hysell, N.L. and Sperling, E.A., 2019. New insights on the Orosirian carbon cycle, early Cyanobacteria, and the assembly of Laurentia from the Paleoproterozoic Belcher Group. Earth and Planetary Science Letters, 520, pp.141-152.		Hamilton, M.A., Buchan, K.L., Ernst. R.E., Stott, G.M., 2009. Widespread and short- lived 1870 Ma mafic magmatism along the northern Superior craton margin. 2009 Joint Assembly (AGU, CGU, GS, GAC, IAH–CNC, MAC, MSA, SEG), 24–27 May 2009, Toronto, Ont., Canada [Abstract].	Hodgskiss, M.S.W. and Sperling, E.A., 2019. Stratigraphy and shale geochemistry of the Belcher Group, Belcher Islands, southern Nunavut. Summary of Activities, pp.65-78.	Garrity, C.P., 2009. Database of the geologic map of North America-adapted from the map by JC reed, Jr. and others (2005).
Labrador Trough took all AREA +max. thickness		Sokomon Iron Formation	375	5.45544e+10			1878.5	--	min	older than 1878.5+-0.8 Ma Houwse lake intrusion	Findlay, J.M., Parrish, R.R., Birkett, T.C. and Watanabe, D.H., 1995. U–Pb ages from the Nimish Formation and Montagnais glomeroporphyritic gabbro of the central New Québec Orogen, Canada. Canadian Journal of Earth Sciences, 32(8), pp.1208-1220.		Chevé, S., 1993. Cadre géologique du complexe carbonatitique du lac Castignon, fosse du Labrador. Le Secteur, Ministere de l'energie et des ressources.	Garrity, C.P., 2009. Database of the geologic map of North America-adapted from the map by JC reed, Jr. and others (2005).	Chevé, S.R. and Machado, N., 1988. Reinvestigation of the Castignon Lake carbonatite complex, Labrador Trough, New Quebec. Réunion annuelle, Programme et résumés. Association géologique du Canada-Association minéralogique du Canada, 14, p.A119.	Conliffe, J., 2017. Geology and geochemistry of the Sokoman Formation in the Gabbro Lake area, eastern Labrador trough. Newfoundland and Labrador Department of Natural Resources Geological Survey, Report, 17, pp.147-168.	Dressler, B. 1979. RCgion de la Fosse du Labrador (56'30' - 57' 15'). Ministkre des Richesses Naturelles du QuCbec, RG-195	Edwards, C.T., Pufahl, P.K., Hiatt, E.E. and Kyser, T.K., 2012. Paleoenvironmental and taphonomic controls on the occurrence of Paleoproterozoic microbial communities in the 1.88 Ga Ferriman Group, Labrador Trough, Canada. Precambrian Research, 212, pp.91-106.	Evans, J.L., 1978. GEOLOGICAL MAPPING OF THE DYKE LAKE-ASTRAY LAKE AREA. Report of Activities, 78(1), p.16.	Machado, N., Clark, T., David, J. and Goulet, N., 1997. U–Pb ages for magmatism and deformation in the New Quebec Orogen. Canadian Journal of Earth Sciences, 34(5), pp.716-723.	Machado, N., Perreault, S., & Hynes, A. (1988). Timing of continental collision in the northern Labrador Trough: Evidence from U - Pb geochronology. Geological Association of Canada-Mineralogical Association of Canada, Program and Abstracts, 13, A76.	Pufahl, P.K., Anderson, S.L. and Hiatt, E.E., 2014. Dynamic sedimentation of Paleoproterozoic continental margin iron formation, Labrador Trough, Canada: Paleoenvironments and sequence stratigraphy. Sedimentary Geology, 309, pp.48-65.	Wardle, R.J., 1982. Geology of the eastern margin of the Labrador Trough Newfound- land Mineral Development Division Map 82-5. St. John’s, Newfoundland, Scale 1:100,000.	Findlay, J.M., Fowler, T.D. and Birkett, T.C. 1990: Geology of the Howse Lake area,western Labrador. Geological Survey of Canada, Open File 2204, 70 pages.
Lake Superior Region		Negaunee Iron Formation	1066.8	8.3544e+09			1891	--	min	intrusion age Baddeleyite	Pietrzak-Renaud, N. and Davis, D., 2014. U–Pb geochronology of baddeleyite from the Belleview metadiabase: Age and geotectonic implications for the Negaunee Iron Formation, Michigan. Precambrian research, 250, pp.1-5.	Reed, R.C. and Daniels, J., 1987. Bedrock geology of Northern Michigan: Michigan Department of Natural Resources. Geological Survey Division, scale, 1(500,000).	Schneider DA, Bickford ME, Cannon WF, Schulz KJ, and Hamilton MA (2002) Age of volcanic rocks and syndepositional iron formations, Marquette Range Supergroup: Implications for the tectonic setting of Paleoproterozoic iron formations of the Lake Superior region. Canadian Journal of Earth Sciences 39: 999–1012.	Bayley RW and James HL (1973) Precambrian iron-formations of the United States. Economic Geology 68: 934–959.	Gair, J. E., & Wier, K. L. (1956). Geology of the Kiernan quad. Iron Co. U.S. Geological Survey.	Gair, J.E. and Han, T.M., 1975. Bedrock geology and ore deposits of the Palmer Quadrangle, Marquette County, Michigan, with a section on the Empire Mine (No. 769). US Govt. Print. Off.,.
Australia-option 1		Frere Fm	250	2.14584e+10	1890	20	1870	1910	12	"Tuff beds were identified in the basal Frere Formation in diamond drill-core from drill hole TDH26 (Supplementary Fig. 1) in the Earaheedy Basin, Australia (see Figure 1) at depths of 386.38–386.46 m, 374.45–374.55 m and 343.47–343.53 m. The basal tuff bed was collected from immediately above the first bed of granular iron formation, which occurs between 387.5 m and 387.3 m (Supplementary Fig. 1…	Rasmussen, B., Fletcher, I. R., Bekker, A., Muhling, J. R., Gregory, C. J., & Thorne, A. M. (2012). Deposition of 1.88-billion-year-old iron formations as a consequence of rapid crustal growth. Nature, 484(7395), 498–501. https://doi.org/10.1038/nature11021	1:500 000 State interpreted bedrock geology of Western Australia, 2016: Unique ID: 118E6B1C-12B7-481A-9804-DD32F0F194B2 Bunting, J. A. (1986). Geology of the eastern part of the Nabberu Basin Western Australia. Geological Survey of Western Australia Bulletin,	Rasmussen, B., Fletcher, I. R., Bekker, A., Muhling, J. R., Gregory, C. J., & Thorne, A. M. (2012). Deposition of 1.88-billion-year-old iron formations as a consequence of rapid crustal growth. Nature, 484(7395), 498–501. https://doi.org/10.1038/nature11021	Rasmussen B and Fletcher IR (2002) Indirect dating of mafic intrusions by SHRIMP U–Pb analysis of monazite in contact metamorphosed shale: An example from the Palaeoproterozoic Capricorn orogen, Western Australia. Earth and Planetary Science Letters 197: 287–299.	Pirajno F, Hocking RM, Reddy SM, and Jones AJ (2009) A review of the geology and geodynamic evolution of the Palaeoproterozoic Earaheedy Basin, Western Australia. Earth- Science Reviews 94: 39–77	Gair, J. E., & Wier, K. L. (1956). Geology of the Kiernan quad. Iron Co. U.S. Geological Survey.	Gair, J.E. and Han, T.M., 1975. Bedrock geology and ore deposits of the Palmer Quadrangle, Marquette County, Michigan, with a section on the Empire Mine (No. 769). US Govt. Print. Off.,.
Lake Superior Region Cuyna Range	North Range and South Range Group/Emily district	Trommald Formation, Rabbit Lake, Mahnomen, Cuyuna-area same as animikie	183	1.60408e+10			1870	--	min	metamoprhosed Rb-Sr whole rock isochron age of 1870 Ma (Peterman 1966)	Peterman 1966, Morey and Southwick 1993	As defined, the formation ranges in thickness from 14 m to more than 150 m on the so-called "North range," from 3 m to 180 m in the Emily district, and aver- ages about 90 m in the so-called "South range" (Marsden, 1972)., 3-182 m in the Bayely and James 1973	https://conservancy.umn.edu/bitstream/handle/11299/60441/2/mgs-241.pdf	Morey, G.B. and Southwick, D.L., 1993. Stratigraphic and sedimentological factors controlling the distribution of epigenetic manganese deposits in iron-formation of the Emily District, Cuyuna Iron Range, East-Central Minnesota. Economic geology, 88(1), pp.104-122.	Morey, G.B., 1978. Lower and middle Precambrian stratigraphic nomenclature for east-central Minnesota, Minnesota Geological Survey. Report of Investigations, 21.	Morey GB and Southwick DL (1995) Allostratigraphic relationships of Early Proterozoic iron-formations in the Lake Superior region. Economic Geology 90: 1983–1993.
Lake Superior Region-Menominee/Iron river		Riverton/Vulcan iron formatino -same area as Negaunee?	228	8.3544e+09			1874	--	min	No volcanics so older than the Schnieder age?	Schneider DA, Bickford ME, Cannon WF, Schulz KJ, and Hamilton MA (2002) Age of volcanic rocks and syndepositional iron formations, Marquette Range Supergroup: Implications for the tectonic setting of Paleoproterozoic iron formations of the Lake Superior region. Canadian Journal of Earth Sciences 39: 999–1012.	"The Riverton Iron 'Formation,the principaliron-bearingunit,isabout150to600feetthick (Bayley and James), "The Vulcan iron formatino varies in thickness from about 300" to 750 feet.	Bayley, R.W. and James, H.T., 1973. Precambrian iron-formations of the United States. Economic Geology, 68(7), pp.934-959.	Reed, R.C. and Daniels, J., 1987. Bedrock geology of Northern Michigan: Michigan Department of Natural Resources. Geological Survey Division, scale, 1(500,000).	James HL, Dutton CE, Pettijohn FJ, and Wier KL (1968) Geology and ore deposits of the Iron River-Crystal Falls district, Iron County, Michigan. U.S. Geological Survey Professional Paper 570, 134 p.	Bayley, R.W., 1959. Geology of the Lake Mary Quadrangle, Iron County, Michigan (No. 1077). US Government Printing Office.
Lake Superior Region-Amasa		Amasa fm/Fence River (30 m overly hemlock), Mansfield member -interbedded/below volcanics (152m), Bird member 61 m.	243	8.94141e+07	1874	18	1856	1892	213	1874 ± 9 Ma, SHRIMP 1sigma	Schneider DA, Bickford ME, Cannon WF, Schulz KJ, and Hamilton MA (2002) Age of volcanic rocks and syndepositional iron formations, Marquette Range Supergroup: Implications for the tectonic setting of Paleoproterozoic iron formations of the Lake Superior region. Canadian Journal of Earth Sciences 39: 999–1012.	"Appear to have been deposited during brief quiesent periods of volcanism, and thus more in common with algoman type than superior". Bayley and James	Bayley RW and James HL (1973) Precambrian iron-formations of the United States. Economic Geology 68: 934–959.	Reed, R.C. and Daniels, J., 1987. Bedrock geology of Northern Michigan: Michigan Department of Natural Resources. Geological Survey Division, scale, 1(500,000).	Cannon, W. F., & Klasner, J. S. (1976). Geological map and geophysical interpretation of the Witch Lake Quadrangle, Marquette, Iron, and Baraga counties (No. 987).	Gair, J.E., and Wier, K.L. 1956. Geology of the Kiernan quad., Iron Co., MI. U.S. Geological Survey, Bulletin 1044.
Northwest Territories, Canada	wilson island group	Basile Formation	100	240000			1895	1928	min-max	The age of the Wilson Island Group is constrained by U-Pb zircon geochronologyof a rhyolite porphyly . Detailed mapping has shown that this porphyry is probably extrusive (Johnson 1987), and thus the U-Pb zircon date of 1928 2 1 1 Ma (Bowring et al. 1984) . A felsite from the Wilson Island Group has an age of 1928 ? I I Ma. The Wilson Island Group is intruded by epizonal granites (Butte lsland In…	Bowring SA, Van Schmus WR, and Hoffman PF (1984) U–Pb zircon ages from Athapuscow aulacogen, East Arm of Great Slave Lake, N.W.T. Canadian Journal of Earth Sciences 21: 1315–1324.	"Beds of grey sandstone and subordinate pelitic siltstone form the90-100 mthickironstonemember" Map 12km long, 20m wide	https://cdnsciencepub.com/doi/10.1139/e90-052	Johnson BJ (1990) Stratigraphy and structure of the Early Proterozoic Wilson Island Group, East Arm thrust-fold belt, N.W.T. Canadian Journal of Earth Sciences 27: 552–569.
Western Mauritania	Ijil Group	Ijil Iron Formation	100	170000000			2000	2200	min-max	Deformed during Birimian orogeny (2100–2000 Ma), Massive Ijil Iron Formation is suggested to be B 2.2 Ga (Bronner and Chauvel, 1979). Although all attempts to directly date the Ijil Complex have failed, the shallow marine platformal nature of the associated sedimentary rocks, contrasting nature of the jasper-rich BIF of the Ijil Complex with the magnetite quartzite BIF of the Tiris Complex, and g…	Bronner G and Chauvel J-J (1979) Precambrian banded iron-formations of the Ijil Group (Kediat Ijil, Reguibat Shield Mauritania). Economic Geology 74: 77–94.	As currently mapped , outcrop of the Kediat Ijil covers approximately 170 km2. (Taylor et al 2016)	Bronner G, Chauvel J-J, and Triboulet C (1992) Les formations ferrife`res du Pre ́cambrien de Mauritanie: Origine et evolution des quartzites ferrugineux. Chronique de la Re ́cherche Minie`re 508: 3–27.	Taylor, C. D., Finn, C. A., Anderson, E. D., Bradley, D. C., Joud, M. Y., Taleb Mohamed, A., & Horton, J. D. (2016). The F’derik-Zouérate Iron District: Mesoarchean and Paleoproterozoic Iron Formation of the Tiris Complex, Islamic Republic of Mauritania. Mineral Resource Reviews, 529–573. doi:10.1007/978-3-319-31733-5_21
South Dakota, USA		Estes Formation, Homestake Iron Formation	100	1.71907e+09			1974	2100	min-max	2.02 and 1.97 Ga (Homestake Iron Formation and equivalents) , In contrast, a tuffaceous layer within the Ellison Formation overlying the Homestake Formation has been dated at 1974 ± 8 Ma (Redden et al., 1990)	Redden, J.A., Peterman, Z.E., Zartman, R.E., DeWitt, E., 1990. U–Th–Pb geochronology and preliminary interpretation of Precambrian tectonic events in the Black Hills, South Dakota. In: Lewry, J.F., Stauffer, M.R. (Eds.), The Early Proterozoic Trans-Hudson orogen of North America. Geological Association of Canada Special Paper. Geological Association of Canada Special Paper, pp. 229–251.	thickness is irregular but is locally as much as 300 ft, iron-formation is about 10-60 ft thick (Fantone, 1983)	https://pubs.usgs.gov/bul/1580/report.pdf	https://pubs.usgs.gov/sim/2777/downloads/2777_pamphlet_508.pdf	https://www.nrc.gov/docs/ML1203/ML120310024.pdf	https://pubs.usgs.gov/sim/2777/downloads/
Central Finland		Paakko Iron Formation	36	262500	2080	45	2035	2125	min-max	2080 ± 45 Ma, whole rock Pb-Pb age, 39-69 m depth	Laajoki K and Saikkonen R (1977) On the geology and geochemistry of the Precambrian iron formations in Va ̈yryla ̈nkyla ̈, South Puolanka area, Finland. Bulletin of the Geological Survey of Finland 292: 137.	~50m thick from Laajoki paper figure, 75m wide, and 3.5km long	Sakko M and Laajoki K (1975) Whole rock Pb–Pb isochron age for the Pa ̈a ̈kko ̈ iron formation in Va ̈yryla ̈nkyla ̈, South Puolanka area, Finland. Bulletin of the Geological Society of Finland 47: 113–116.	Laajoki K and Saikkonen R (1977) On the geology and geochemistry of the Precambrian iron formations in Va ̈yryla ̈nkyla ̈, South Puolanka area, Finland. Bulletin of the Geological Survey of Finland 292: 137.	LAAJOKI, KAUKO 1975: Rare-earth elements in Precambrian iron formations in Väyrylänkylä, South Puolanka area, Finland. Bull. Geol. Soc. Finland 47, 93—107.
Minnesota, USA	Mille Lacs Group	Glen Township Formation/Randall Fm-same as biwabik area?	20	1.60408e+10			1832	2236	min-max	They yield a Sm-Nd isochron age of emplacement of volcanics, approximately the same age as 2197+-39 Ma and metamorphic Rb-Sr isochron age of 1746 +- 86 Ma (Beck, 1988).	Beck, J.W., 1988, Implications for early Proterozoic tectonics and the origin of continental flood basalts, based on combined trace element and neodymium/strontium isotopic studies of mafic igneous rocks of the Penokean Lake Superior belt, Minnesota, Wisconsin and Michigan: Minneapolis, Minn., University of Minnesota, Ph.D. dissertation, 262 p.	As judged from drilling data, beds of banded iron-formation and chert are scattered throughout the formation as thin, len- ticular bodies that do not appear to persist for any great distance along strike. However, several iron-rich units have been traced for distances of a few kilometers (pl. 1) along strike by drilling.	Morey, G.B., 1978. Lower and middle Precambrian stratigraphic nomenclature for east-central Minnesota, Minnesota Geological Survey. Report of Investigations, 21.	https://kipdf.com/preliminary-description-and-interpretation-of-the-hattenberger-deep-test-well-ca_5ab25f3c1723dd349c8117cc.html	Morey GB and Southwick DL (1995) Allostratigraphic relationships of Early Proterozoic iron-formations in the Lake Superior region. Economic Geology 90: 1983–1993.
Northern and southern parts of West-Nigeria		Malumfashi, Maru, Birnin Gwari, Kushaka, Muro, Egbe-Isanlu, and Obajana schist belts	60	40000000			2000	2300	min-max	Thought to be equivalent of the 2.3 Ga Birimian Sequence, and reactivated by ~2 Ga (annor, 1997; Ferre et al 1996)		The iron-formation is relatively thin (max. 15 m) (annor et al 1997) "extends ridges over a distance of about 6 km", wifth is 500m from map." schist belts occupy a N/S trending area being more than 400 km broad and more than 1000 km long (Mucke) In the latter schist belt, a considerable thickness of the silicate facies of at least 60 m was pene- trated by a borehole during an exploration drilling…	Annor, A.E., Olobaniyi, S.B. and Mücke, A., 1997. Silicate facies iron-formation of the Egbe-Isanlu Palaeoproterozoic schist belt, southwest Nigeria. Journal of African Earth Sciences, 24(1-2), pp.39-50.	Mucke A (2005) The Nigerian manganese-rich iron-formations and their host rocks – From sedimentation to metamorphism. Journal of African Earth Sciences 41: 407–436.	Adekoya, J.A., 1988. Precambrian Iron Formation of Northwestern Nigeria. Precambrian Geology of Nigeria, GSN Publication, Kaduna, Nigeria, pp.195-210.	: https://www.researchgate.net/publication/238371440
Bahia State, Brazil		Caldeirao belt	20	1050000000			2080	2170	min-max	The SHRIMP weighted age calculated for 7 grains was 2148 ± 9 Ma Pb-Pb, unclear relationship to iron formation based on other ages and deformation K-Ar, estimate 2170-2080 Ma. The geochronological data indicate a Palaeoproterozoic evolution for this belt, between 2170 Ma and 2080 Ma (Oliveira et al., 2002;Oliveira et al., 2010;Oliveira et al., 2011).	Oliveira et al., 2011	150 km long by 7km wide, "minor banded iron formation) were deposited onto a continental shelf"	https://www.researchgate.net/publication/223007435_Reconnaissance_U-Pb_geochronology_of_Precambrian_quartzites_from_the_Caldeirao_belt_and_their_basement_NE_Sao_Francisco_Craton_Bahia_Brazil_Implications_for_the_early_evolution_of_the_Paleoproterozoic/link/5bd10aa492851cabf265b99d/download	https://pubs.usgs.gov/bul/0962c/report.pdf	Oliveira EP, Mello EF, and McNaughton N (2002) Reconnaissance U–Pb geochronology of Precambrian quartzites from the Caldeira ̃o belt and their basement, NE Sa ̃o Francisco craton, Bahia, Brazil: Implications for the early evolution of the Paleoproterozoic Itabuna-Salvador-Curac ̧a ́ orogen. Journal of South American Earth Sciences 15: 349–362.	Jordan VH (1972) Die Minas-Gruppe in Nordost-Bahia, Brasilien. Geologische Rundschau 61: 441–469.
Northern Zimbabwe	Lomagundi Group	Mcheka Formation-Sandy Argillite Member (uppermost)	50	7500000			2100	2216	min-max	Lomagundi Group dolomites have been dated using the 207Pb/206Pb technique at 2150 ± 50 Ma (Schidlowski and Todt, 1998) ATUALLY UNPUBLICHED ABSTRACT, Underlying Deweras Gp 2216+22 Ma	Sawada, H., Mugandani, E.T., Sato, T., Sawaki, Y., Sakata, S., Isozaki, Y. and Maruyama, S., 2019. Age constraints on the Palaeoproterozoic Lomagundi–Jatuli Event in Zimbabwe: Zircon geochronology of the Magondi Supergroup. Terra Nova, 31(5), pp.438-444.	estimate 5km wide belt-estimate whole width from map It is up to 2m thick, extending for 1.5km along strike The Rusere example is a silicate-facies iron formation, up to 50 m thick and traceable for at least 750 m along strike.	Master S (1991) Stratigraphy, tectonic setting, and mineralization of the Early Proterozoic Magondi Supergroup, Zimbabwe: A review. Economic Geology Research Unit Information Circular 238, 75 p. Johannesburg: University of Witwatersrand.	Mapeo RBM, Armstrong RA, and Kampunzu AB (2001) SHRIMP U–Pb zircon geochronology of gneisses from the Gweta borehole, northeast Botswana: Implications for the Palaeoproterozoic Magondi belt in southern Africa. Geological Magazine 138: 299–308.	S. Master et al. / Precambrian Research 182 (2010) 254–273	Sawada, H., Mugandani, E.T., Sato, T., Sawaki, Y., Sakata, S., Isozaki, Y. and Maruyama, S., 2019. Age constraints on the Palaeoproterozoic Lomagundi–Jatuli Event in Zimbabwe: Zircon geochronology of the Magondi Supergroup. Terra Nova, 31(5), pp.438-444.
Liaoning Province, China	Lüliang Group (Replacing "Liaoning Province, China Liaohe Group" of bekker)	Yuanjiacun Formation-	400	118900000			2100	2380	min-max	In addition, based on detailed geochronological studies of the overlying metavolcanic rocks and interbedded clastic metasedimentary rocks (Liu et al., 2012; Wang et al., 2015), the depositional age of the Yuanjiacun BIF can be constrained to ~2.38 to 2.21 Ga, which contrasts with the general paucity of giant BIF deposition worldwide during the time interval of 2.4 to 2.0 Ga	Liu et al., 2012; Lui et al., 2014; Wang et al., 2015	The Yuanjiacun BIF is distributed in a north-northeast– northeast-east orientation, extending 20.5 km in length and 5.8 km in width, estimate stratigraphic thickness as 450 m from cross section figure	https://www.sciencedirect.com/science/article/abs/pii/S0301926817304448	Luo Y, Sun M, Zhao G-C, Li S-Z, Xu P, Ye K, and Xia X-P (2004) LA-ICP-MS U–Pb zircon ages of the Liaohe Group in the eastern block of the North China craton: Constraints on	Wang;, Kurt O. Konhauser; Lianchang Zhang, Depositional Environment of the Paleoproterozoic Yuanjiacun Banded Iron Formation in Shanxi Province, China Economic Geology (2015) 110 (6): 1515–1539. https://doi.org/10.2113/econgeo.110.6.1515
Liberia, West Africa		Nimba Itabirite	450	225000000			2200	2615	min-max	Age determinations on detrital zircons from a (Guinea) Nimba banded ferruginous-quartzite (itabirite?) gave an age of 2615 Ma (Billa et al., (1999)). The only other relevant age determination from the Nimba area, an Rb-Sr-method determination on a Nimba Supergroup mica phyllite is 2200 Ma (Force, 1983).	Force, E., 1983. Geology of Nimba County Liberia. U.S. Geol. Surv. Bull. 1540: 27p	"he Nimba Rangehasa total lengthof 45 km", commonly 350-450m thick, range has 5km width map" Berge et al paper			"he Nimba Rangehasa total lengthof 45 km", commonly 350-450m thick, range has 5km width map" Berge et al paper		Berge JW, Johansson K, and Jack J (1977) Geology and origin of the hematite ores of the Nimba Range, Liberia. Economic Geology 72: 582–607.	Billa M, Feybesse J-L, Bronner G, et al. (1999) Les formations a` quartzites rubane ́s ferrugineux des Monts Nimba et du Simandou: Des unite ́s empile ́es tectoniquement, sur un “soubassement” plutonique Arche ́en (craton de Ke ́ne ́ma-Man), lors de l’oroge`ne E ́burne ́en. Comptes Rendus de l’Acade ́mie des Sciences, Series IIA 329: 287–294.
Gauteng and North West Provinces, South Africa	Pretoria Group	Timeball Hill Formation	40	62159920644			2266	2310	min-max	Zircons in two tuff layers from the upper Timeball Hill Forma- tion (drill-hole EBA1, 709.5 m and 711.6 m depth) gave weighted mean 207Pb/206Pb ages of 2256 ± 6 Ma (MSWD = 1.0; n = 24; Fig. 5A) and 2266 ± 4 Ma (MSWD = 1.1; n = 62; Fig. 5B), respec- tively, which are interpreted as the ages for deposition. Zircons in a tuffaceous bed from the lower Timeball Hill Formation (drill- hole UD49, 711.85…	Rasmussen B, Bekker A, Fletcher IR (2013) Correlation of Paleoproterozoic glaciations based on U-Pb zircon ages for tuff beds in the Transvaal and Huronian Supergroups. Earth Planet Sci Lett 382:173–180.	20 foot basal +6 ft upper pisolith layer --H. SCHWEIGART---took area of whole transvaal system, "olitic ironstones are developed over an area of more than 100 000 km" Doorland thesis,	Billa M., Feybesse, J.L., Bronner, G., Lerouge, C., Mile ́si, J.P., Traore ́, S., Diaby, S., 1999. Les formations a` quartzites rubane ́s ferrugineux des Monts Nimba et du Simandou: des unite ́s empile ́es tectoniquement, sur un «soubassement» plutonique Arche ́en (craton de Ke ́ne ́ma-Man), lors de l oroge`ne eburne ́en. Comptes Rendus Acade ́mie Sciences, Paris Sciences Terre Plane`tes 329: 287…	O. Catuneanu, P.G. Eriksson / Sedimentary Geology 147 (2002) 71–88	Schweigart H (1965) Genesis of the iron ores of the Pretoria Series, South Africa. Economic Geology 60: 269 298.	Dorland HC (1999) Paleoproterozoic Laterites, Red Beds and Ironstones of the Pretoria Group with Reference to the History of Atmospheric Oxygen. Unpublished MSc Thesis, Rand Afrikaans University, South Africa, 147 p.	Hannah JL, BekkerA, Stein HJ, Markey RJ, and Holland HD (2004) Primitive Os and 2316 Ma age for marine shale: Implications for Paleoproterozoic
Northern Cape Province, South Africa		Hotazel Iron Formation-area of tranvaal	60	62159920644			2393	2426	min-max	New age constraints of 2.4 Ga for the volcanic Ongeluk Formation, which conformably underlies the Hotazel succession, question the previous postGOE interpretatin. 2426 ± 3 Ma Ongeluk Formation (Gumsley et al., 2017). An event at 2393 ± 17 Ma, recorded by the PbPb whole-rock systematics of carbonates from the Mooidraai Formation (Bau et al., 1999; Fairey et al., 2013),	Bau, M., Romer, R.L., Lüders, V. and Beukes, N.J., 1999. Pb, O, and C isotopes in silicified Mooidraai dolomite (Transvaal Supergroup, South Africa): implications for the composition of Paleoproterozoic seawater and ‘dating’the increase of oxygen in the Precambrian atmosphere. Earth and Planetary Science Letters, 174(1-2), pp.43-57.	40 to 45 lB in the areanorthof the Mamatwa Tiscokos, 60 from Vafeas et al 2018	Tsikos H and Moore JM (1997) Petrography and geochemistry of the Paleoproterozoic Hotazel Iron-Formation, Kalahari manganese field, South Africa: Implications for Precambrian manganese metallogenesis. Economic Geology 92: 87–97.	Tsikos H, Beukes NJ, Moore JM, and Harris C (2003) Deposition, diagenesis, and secondary enrichment of metals in the Paleproterozoic Hotazel Iron Formation, Kalahari manganese field, South Africa. Economic Geology 98: 1449–1462.	Cornell DH, Schu ̈tte SS, and Eglington BL (1996) The Ongeluk basaltic andesite formation in Griqualand West, South Africa: Submarine alteration in a 2222 Ma Proterozoic sea. Precambrian Research 79: 101–123.	Dorland HC (2004) Provenance Ages and Timing of Sedimentation of Selected Neoarchean and Paleoproterozoic Successions on the Kaapvaal Craton. Unpublished PhD Thesis,
Excluded:
Liaohe may not actually be iron formation? Couldn't find any papers…ONLY ARCHEAN IF See: Li, Z., Chen, B., & Yan, X. (2018). The Liaohe Group: An insight into the Paleoproterozoic tectonic evolution of the Jiao–Liao–Ji Belt, North China Craton. Precambrian Research. doi:10.1016/j.precamres.2018.01.009 87. Luo Y, Sun M, Zhao G-C, Li S-Z, Xu P, Ye K, and Xia X-P (2004) LA-ICP-MS U–Pb zircon ages of…
Alwar "relatively immature sandstone with preponderance of siliceous-ferruginous cement " (North Delhi Fold Belt (modified from Singh, 1982)). ALSO "Con- glomerates are chiefly composed of banded iron-formation (25-85%), granite (5-50%), marble (5-50%) and quartzite (5-35%) (Table II). "											The geochronological data indicate a Palaeoproterozoic evolution for this belt, between 2170 Ma and 2080 Ma (Silva et al., 2001; Mello et al., 2006; Rios et al., 2009; Oliveira et al., 2010).
The Lüliang area is located in the western part of Shanxi Province, where large amounts of banded iron formation are exposed, including the Jianshan, Hugushan, and Yuanjiacun BIFs
India		Alwar Fm	1000		1850	15	1835	1865		The Rajasthan and Haryana Formations; Biju-Sekhar et al. (2003) say between 1800-1700 Ma	Biju-Sekhar S, Yokoyama K, Pandit MK, Okudaira T, Yoshida M, and Santosh M (2003) Late Paleoproterozoic magmatism in Delhi fold belt, NW India and its implication: Evidence from EPMA chemical ages of zircons. Journal of Asian Earth Sciences 22: 189–207.	Deb M and Thorpe RI (2004) Geochronological constraints in the Precambrian geology of Rajasthan and their metallogenic implications. In: Deb M and Goodfellow WD (eds.) Sediment-Hosted Lead-Zinc Sulphide Deposits, pp. 246–263. New Delhi: Narosa Publishing.	Patwardhan AM, Patil DN, and Sukhtankar RK (1987) On magnetite quartizites occurring around Narnaul, Haryana, India. In: Appel PWU and LaBerge GL (eds.) Precambrian Iron- Formations, pp. 513–537. Athens: Theophrastus Publications.
Western Australia		Duck Creek		1.84559e+09	1795	7	1788	1802		Thus, the 1795 ± 7 Ma age reported here provides direct confirmation that ferruginous waters persisted in the Ashburton foreland basin until ca. 1800 Ma or later, a min- imum of tens of millions of years after they disappeared in North America.Wilson et al., 2010.
Australia-option 2		Frere Fm	250	2.14584e+10	1891	16	1875	1907	0.1	basal tuff May have Lead Loss...."Tuff beds were identified in the basal Frere Formation in diamond drill-core from drill hole TDH26 (Supplementary Fig. 1) in the Earaheedy Basin, Australia (see Figure 1) at depths of 386.38–386.46 m, 374.45–374.55 m and 343.47–343.53 m. The basal tuff bed was collected from immediately above the first bed of granular iron formation, which occurs between 387.5 m …	Rasmussen, B., Fletcher, I. R., Bekker, A., Muhling, J. R., Gregory, C. J., & Thorne, A. M. (2012). Deposition of 1.88-billion-year-old iron formations as a consequence of rapid crustal growth. Nature, 484(7395), 498–501. https://doi.org/10.1038/nature11021
Wompay orogen	Coronation Supergroup	Tree River Fm-ferrugenous sandstone so exlcuded								tuff in black shale (Fontano Fm) conformably overlying ferrugenous sandstone of the upper Tree River Fm ( Hoffman et al. 2011).	Hoffman et al. 2011 Can. J. Earth Sci. 48, 281−293
Note: Luo et al. (2004): between 2050 and 1930 Ma
REFERENCES
1:500 000 State interpreted bedrock geology of Western Australia, 2016: Unique ID: 118E6B1C-12B7-481A-9804-DD32F0F194B2
Addison, W.D., Brumpton, G.R., Vallini, D.A., McNaughton, N.J., Davis, D.W., Kissin, S.A., Fralick, P.W. and Hammond, A.L., 2005. Discovery of distal ejecta from the 1850 Ma Sudbury impact event. Geology, 33(3), pp.193-196.
Adekoya, J.A., 1988. Precambrian Iron Formation of Northwestern Nigeria. Precambrian Geology of Nigeria, GSN Publication, Kaduna, Nigeria, pp.195-210.
Aftabi, A., Atapour, H., Mohseni, S. and Babaki, A., 2021. Geochemical discrimination among different types of banded iron formations (BIFs): A comparative review. Ore Geology Reviews, 136, p.104244.
Annor, A.E., Olobaniyi, S.B. and Mücke, A., 1997. Silicate facies iron-formation of the Egbe-Isanlu Palaeoproterozoic schist belt, southwest Nigeria. Journal of African Earth Sciences, 24(1-2), pp.39-50.
Bau, M., Romer, R.L., Lüders, V. and Beukes, N.J., 1999. Pb, O, and C isotopes in silicified Mooidraai dolomite (Transvaal Supergroup, South Africa): implications for the composition of Paleoproterozoic seawater and ‘dating’the increase of oxygen in the Precambrian atmosphere. Earth and Planetary Science Letters, 174(1-2), pp.43-57.
Bayley, R.W. and James, H.T., 1973. Precambrian iron-formations of the United States. Economic Geology, 68(7), pp.934-959.
Bayley, R.W., 1959. Geology of the Lake Mary Quadrangle, Iron County, Michigan (No. 1077). US Government Printing Office.
Beck, J.W., 1988, Implications for early Proterozoic tectonics and the origin of continental flood basalts, based on combined trace element and neodymium/strontium isotopic studies of mafic igneous rocks of the Penokean Lake Superior belt, Minnesota, Wisconsin and Michigan: Minneapolis, Minn., University of Minnesota, Ph.D. dissertation, 262 p.
Bekker, A., Krapež, B. and Karhu, J.A., 2020. Correlation of the stratigraphic cover of the Pilbara and Kaapvaal cratons recording the lead up to Paleoproterozoic Icehouse and the GOE. Earth-Science Reviews, 211, p.103389.
Bekker, A., Master, S., Karhu, J.A. and Verhagen, B.T., 2001, May. Chemostratigraphy of the Paleoproterozoic Magondi Supergroup, Zimbabwe. In Eleventh Annual VM Goldschmidt Conference (p. 3772).
Berge, J.W., Johansson, K. and Jack, J., 1977. Geology and origin of the hematite ores of the Nimba Range, Liberia. Economic Geology, 72(4), pp.582-607.
Billa M., Feybesse, J.L., Bronner, G., Lerouge, C., Mile ́si, J.P., Traore ́, S., Diaby, S., 1999. Les formations a` quartzites rubane ́s ferrugineux des Monts Nimba et du Simandou: des unite ́s empile ́es tectoniquement, sur un «soubassement» plutonique Arche ́en (craton de Ke ́ne ́ma-Man), lors de l oroge`ne eburne ́en. Comptes Rendus Acade ́mie Sciences, Paris Sciences Terre Plane`tes 329: 287…
Bodenlos, A.J., 1950. Magnesite deposits of central Ceará, Brazil (No. 962-C). US Govt. Print. Off.,.
Bowring, S.A., Schmus, W.V. and Hoffman, P.F., 1984. U–Pb zircon ages from Athapuscow aulacogen, east arm of Great Slave Lake, NWT, Canada. Canadian Journal of Earth Sciences, 21(11), pp.1315-1324.
Bronner G, Chauvel J-J, and Triboulet C (1992) Les formations ferrife`res du Pre ́cambrien de Mauritanie: Origine et evolution des quartzites ferrugineux. Chronique de la Re ́cherche Minie`re 508: 3–27.
Bronner, G. and Chauvel, J.J., 1979. Precambrian banded iron-formations of the Ijil Group (Kediat Ijil, Reguibat Shield, Mauritania). Economic Geology, 74(1), pp.77-94.
Bunting, J. A. (1986). Geology of the eastern part of the Nabberu Basin Western Australia. Geological Survey of Western Australia Bulletin,
Cannon, W. F., & Klasner, J. S. (1976). Geological map and geophysical interpretation of the Witch Lake Quadrangle, Marquette, Iron, and Baraga counties (No. 987).
Cannon, W.F., LaBerge, G.L., Klasner, J.S. and Schulz, K.J., 2008. The Gogebic iron range—A sample of the northern margin of the Penokean fold and thrust belt (No. 1730). US Geological Survey.
Catuneanu, O. and Eriksson, P.G., 2002. Sequence stratigraphy of the Precambrian Rooihoogte–Timeball Hill rift succession, Transvaal Basin, South Africa. Sedimentary Geology, 147(1-2), pp.71-88.
Chevé, S., 1993. Cadre géologique du complexe carbonatitique du lac Castignon, fosse du Labrador. Le Secteur, Ministere de l'energie et des ressources.
Chevé, S.R. and Machado, N., 1988. Reinvestigation of the Castignon Lake carbonatite complex, Labrador Trough, New Quebec. Réunion annuelle, Programme et résumés. Association géologique du Canada-Association minéralogique du Canada, 14, p.A119.
Conliffe, J., 2017. Geology and geochemistry of the Sokoman Formation in the Gabbro Lake area, eastern Labrador trough. Newfoundland and Labrador Department of Natural Resources Geological Survey, Report, 17, pp.147-168.
Cornell DH, Schu ̈tte SS, and Eglington BL (1996) The Ongeluk basaltic andesite formation in Griqualand West, South Africa: Submarine alteration in a 2222 Ma Proterozoic sea. Precambrian Research 79: 101–123.
Dahl, P.S., et al., 2006. 2480 Ma mafic magmatism in the northern Black Hills, South Dakota: a new link connecting the Wyoming and Superior cratons. Can. J. Earth Sci. 43, 1579–1600.
Dahl, P.S., Holm, D.K., Gardner, E.T., Hubacher, F.A., Foland, K.A., 1999. New constraints on the timing of Early Proterozoic tectonism in the Black Hills (South Dakota), with implications for docking of the Wyoming province with Laurentia. Geol. Soc. Am. Bull. 111, 1335–1349.
DeWitt, E., Redden, J.A., Wilson, A.B., Buscher, D. and Dersch, J.S., 1986. Mineral resource potential and geology of the Black Hills National Forest, South Dakota and Wyoming with a section on salable commodities (No. 1580). US Geological Survey.
Dong, Y., Bi, J.H., Xing, D.H., Ge, W.C., Yang, H., Hao, Y.J., Ji, Z. and Jing, Y., 2019. Geochronology and geochemistry of Liaohe Group and Liaoji granitoid in the Jiao-Liao-Ji Belt, North China Craton: Implications for petrogenesis and tectonic evolution. Precambrian Research, 332, p.105399.
Dorland HC (1999) Paleoproterozoic Laterites, Red Beds and Ironstones of the Pretoria Group with Reference to the History of Atmospheric Oxygen. Unpublished MSc Thesis, Rand Afrikaans University, South Africa, 147 p.
Dorland HC (2004) Provenance Ages and Timing of Sedimentation of Selected Neoarchean and Paleoproterozoic Successions on the Kaapvaal Craton. Unpublished PhD Thesis,
Dorland, H.C., 2012. Paleoproterozoic laterites, red beds and ironstones of the Pretoria Group with reference to the history of atmospheric oxygen. University of Johannesburg (South Africa).
Dressler, B. 1979. RCgion de la Fosse du Labrador (56'30' - 57' 15'). Ministkre des Richesses Naturelles du QuCbec, RG-195
Duncanson, S., Brengman, L., Johnson, J., Eyster, A., Fournelle, J., Moy, A., 2024. Reconstructing diagenetic mineral reactions from silicified horizons of the Paleoproterozoic Biwabik Iron Formation, Minnesota. American Mineralogist.
Edwards, C.T., Pufahl, P.K., Hiatt, E.E. and Kyser, T.K., 2012. Paleoenvironmental and taphonomic controls on the occurrence of Paleoproterozoic microbial communities in the 1.88 Ga Ferriman Group, Labrador Trough, Canada. Precambrian Research, 212, pp.91-106.
Evans, J.L., 1978. GEOLOGICAL MAPPING OF THE DYKE LAKE-ASTRAY LAKE AREA. Report of Activities, 78(1), p.16.
Fairey, B., Tsikos, H., Corfu, F. and Polteau, S., 2013. U–Pb systematics in carbonates of the Postmasburg Group, Transvaal Supergroup, South Africa: primary versus metasomatic controls. Precambrian Research, 231, pp.194-205.
Fantone, K., 1983. Gcochemistry and petrology of the carbonate iron-formations and ferruginous cherts of the northcastern Black Hills, South Dakota: Rapid City, S. Dak., South Dakota School of Mines and Technology MS thesis.
Ferré, E., Déléris, J., Bouchez, J.L., Lar, A.U. and Peucat, J.J., 1996. The Pan-African reactivation of Eburnean and Archaean provinces in Nigeria: structural and isotopic data. Journal of the Geological Society, 153(5), pp.719-728.
Findlay, J.M., Fowler, T.D. and Birkett, T.C. 1990: Geology of the Howse Lake area,western Labrador. Geological Survey of Canada, Open File 2204, 70 pages.
Findlay, J.M., Parrish, R.R., Birkett, T.C. and Watanabe, D.H., 1995. U–Pb ages from the Nimish Formation and Montagnais glomeroporphyritic gabbro of the central New Québec Orogen, Canada. Canadian Journal of Earth Sciences, 32(8), pp.1208-1220.
Force, E., 1983. Geology of Nimba County Liberia. U.S. Geol. Surv. Bull. 1540: 27p
Fralick, P., Davis, D.W. and Kissin, S.A., 2002. The age of the Gunflint Formation, Ontario, Canada: single zircon U-Pb age determinations from reworked volcanic ash. Canadian Journal of Earth Sciences, 39(7), pp.1085-1091.
Fralick, P., Planavsky, N., Burton, J., Jarvis, I., Addison, W.D., Barrett, T.J. and Brumpton, G.R., 2017. Geochemistry of Paleoproterozoic Gunflint Formation carbonate: Implications for hydrosphere-atmosphere evolution. Precambrian Research, 290, pp.126-146.
Frei, R., Dahl, P.S., Duke, E.F., Frei, K.M., Hansen, T.R., Frandsson, M.M. and Jensen, L.A., 2008. Trace element and isotopic characterization of Neoarchean and Paleoproterozoic iron formations in the Black Hills (South Dakota, USA): assessment of chemical change during 2.9–1.9 Ga deposition bracketing the 2.4–2.2 Ga first rise of atmospheric oxygen. Precambrian Research, 162(3-4), pp.441-474.
Gair, J.E. and Han, T.M., 1975. Bedrock geology and ore deposits of the Palmer Quadrangle, Marquette County, Michigan, with a section on the Empire Mine (No. 769). US Govt. Print. Off.,.
Gair, J.E., and Wier, K.L. 1956. Geology of the Kiernan quad., Iron Co., MI. U.S. Geological Survey, Bulletin 1044.
Garrity, C.P., 2009. Database of the geologic map of North America-adapted from the map by JC reed, Jr. and others (2005).
Gong, Z. and Evans, D.A., 2021. Constraints on the Precambrian paleogeography of West African Craton. Ancient Supercontinents and the Paleogeography of Earth, pp.423-443.
Goode ADT, Hall WDM, and Bunting JA (1983) The Nabberu basin of Western Australia. In: Trendall AF and Morris RC (eds.) Iron-Formation: Facts and Problems. Developments in Precambrian Geology, vol. 6, pp. 295–323. Amsterdam: Elsevier.
Rasmussen B and Fletcher IR (2002) Indirect dating of mafic intrusions by SHRIMP U–Pb analysis of monazite in contact metamorphosed shale: An example from the Palaeoproterozoic Capricorn orogen, Western Australia. Earth and Planetary Science Letters 197: 287–299.
Pirajno F, Hocking RM, Reddy SM, and Jones AJ (2009) A review of the geology and geodynamic evolution of the Palaeoproterozoic Earaheedy Basin, Western Australia. Earth- Science Reviews 94: 39–77
Gumsley, A.P., Chamberlain, K.R., Bleeker, W., Söderlund, U., De Kock, M.O., Larsson, E.R. and Bekker, A., 2017. Timing and tempo of the Great Oxidation Event. Proceedings of the National Academy of Sciences, 114(8), pp.1811-1816.
Hamilton, M.A., Buchan, K.L., Ernst. R.E., Stott, G.M., 2009. Widespread and short- lived 1870 Ma mafic magmatism along the northern Superior craton margin. 2009 Joint Assembly, 24–27 May 2009, Toronto, Ont., Canada [Abstract].
Hannah, J.L., Bekker, A., Stein, H.J., Markey, R.J. and Holland, H.D., 2004. Primitive Os and 2316 Ma age for marine shale: implications for Paleoproterozoic glacial events and the rise of atmospheric oxygen. Earth and Planetary Science Letters, 225(1-2), pp.43-52.
Hemming, S. R., McLennan, S. M., & Hanson, G. N. (1995). Geochemical and Nd/Pb isotopic evidence for the provenance of the Early Proterozoic Virginia Formation, MN: Implications for the tectonic setting of the Animikie Basin. The Journal of Geology, 103, 147–168. https://doi.org/10.1086/629733
Hodgskiss, M.S., Dagnaud, O.M., Frost, J.L., Halverson, G.P., Schmitz, M.D., Swanson-Hysell, N.L. and Sperling, E.A., 2019. New insights on the Orosirian carbon cycle, early Cyanobacteria, and the assembly of Laurentia from the Paleoproterozoic Belcher Group. Earth and Planetary Science Letters, 520, pp.141-152.
Hodgskiss, M.S.W. and Sperling, E.A., 2019. Stratigraphy and shale geochemistry of the Belcher Group, Belcher Islands, southern Nunavut. Summary of Activities, pp.65-78.
Hoffman, P.F., Bowring, S.A., Buchwaldt, R. and Hildebrand, R.S., 2011. Birthdate for the Coronation paleocean: age of initial rifting in Wopmay orogen, Canada. Canadian Journal of Earth Sciences, 48(2), pp.281-293.
Hotchkiss (1919). Geology of the Gogebic range and its relation to recent mining developments. Engineering and Mining Journal, 108, 443–452.
James HL (1983) Distribution of banded iron-formations in space and time. In: Trendall AF and Morris RC (eds.) Iron-formation: Facts and problems. Developments in Precambrian Geology, vol. 6, pp. 471–490. Amsterdam: Elsevier.
James HL, Dutton CE, Pettijohn FJ, and Wier KL (1968) Geology and ore deposits of the Iron River-Crystal Falls district, Iron County, Michigan. U.S. Geological Survey Professional Paper 570, 134 p.
James, H. L. (1954). Sedimentary facies of iron-formation. Economic Geology, 49(3), 235–293. https://doi.org/10.2113/gsecongeo.49.3.235
Johnson, B.J., 1990. Stratigraphy and structure of the Early Proterozoic Wilson Island Group, East Arm thrust-fold belt, NWT. Canadian Journal of Earth Sciences, 27(4), pp.552-569.
Jordan VH (1972) Die Minas-Gruppe in Nordost-Bahia, Brasilien. Geologische Rundschau 61: 441–469.
Khan, I., Sahoo, P.R. and Rai, D.K., 2014. Proterozoic felsic volcanics in Alwar Basin of North Delhi Fold Belt, Rajasthan: implication for copper mineralization. Current Science, 106(1), pp.27-28.
Kunzmann, M., Gutzmer, J., Beukes, N.J. and Halverson, G.P., 2014. Depositional environment and lithostratigraphy of the Paleoproterozoic Mooidraai Formation, Kalahari manganese field, South Africa. South African Journal of Geology, 117(2), pp.173-192.
Kusky, T.M., 1991. Structural development of an Archean orogen, western Point Lake, northwest territories. Tectonics, 10(4), pp.820-841.
Laajoki K and Saikkonen R (1977) On the geology and geochemistry of the Precambrian iron formations in Va ̈yryla ̈nkyla ̈, South Puolanka area, Finland. Bulletin of the Geological Survey of Finland 292: 137.
LAAJOKI, KAUKO 1975: Rare-earth elements in Precambrian iron formations in Väyrylänkylä, South Puolanka area, Finland. Bull. Geol. Soc. Finland 47, 93—107.
Laybourn, D. P. (1979). The geology and metamorphism of the Ironwood iron-formation, Gogebic range, Wisconsin. (Doctoral dissertation). University of Minnesota.
Lenhardt, N., Eriksson, P.G., Catuneanu, O. and Bumby, A.J., 2012. Nature of and controls on volcanism in the ca. 2.32–2.06 Ga Pretoria Group, Transvaal Supergroup, Kaapvaal craton, South Africa. Precambrian Research, 214, pp.106-123.
Li, Z., Chen, B. and Yan, X., 2019. The Liaohe Group: An insight into the Paleoproterozoic tectonic evolution of the Jiao–Liao–Ji Belt, North China Craton. Precambrian Research, 326, pp.174-195.
Liu, S., Zhang, J., Li, Q., Zhang, L., Wang, W. and Yang, P., 2012. Geochemistry and U–Pb zircon ages of metamorphic volcanic rocks of the Paleoproterozoic Lüliang Complex and constraints on the evolution of the Trans-North China Orogen, North China Craton. Precambrian Research, 222, pp.173-190.
Luo, Y., Sun, M., Zhao, G., Li, S., Xu, P., Ye, K. and Xia, X., 2004. LA-ICP-MS U–Pb zircon ages of the Liaohe Group in the Eastern Block of the North China Craton: constraints on the evolution of the Jiao-Liao-Ji Belt. Precambrian Research, 134(3-4), pp.349-371.
Machado, N., Clark, T., David, J. and Goulet, N., 1997. U–Pb ages for magmatism and deformation in the New Quebec Orogen. Canadian Journal of Earth Sciences, 34(5), pp.716-723.
Machado, N., Perreault, S., & Hynes, A. (1988). Timing of continental collision in the northern Labrador Trough: Evidence from U - Pb geochronology. Geological Association of Canada-Mineralogical Association of Canada, Program and Abstracts, 13, A76.
Manyeruke, T.D., Blenkinsop, T.G., Buchholz, P., Love, D., Oberthür, T., Vetter, U.K. and Davis, D.W., 2004. The age and petrology of the Chimbadzi Hill Intrusion, NW Zimbabwe: first evidence for early Paleoproterozoic magmatism in Zimbabwe. Journal of African Earth Sciences, 40(5), pp.281-292.
Mapeo RBM, Armstrong RA, and Kampunzu AB (2001) SHRIMP U–Pb zircon geochronology of gneisses from the Gweta borehole, northeast Botswana: Implications for the Palaeoproterozoic Magondi belt in southern Africa. Geological Magazine 138: 299–308.
Marsden, R.W., 1972. Cuyuna district. Geology of Minnesota: A Centennial Volume. Minnesota Geological Survey, St. Paul, pp.227-239.
Master S (1991) Stratigraphy, tectonic setting, and mineralization of the Early Proterozoic Magondi Supergroup, Zimbabwe: A review. Economic Geology Research Unit Information Circular 238, 75 p. Johannesburg: University of Witwatersrand.
Master, S., Bekker, A. and Hofmann, A., 2010. A review of the stratigraphy and geological setting of the Palaeoproterozoic Magondi Supergroup, Zimbabwe–Type locality for the Lomagundi carbon isotope excursion. Precambrian Research, 182(4), pp.254-273.
Mehdi, M., Kumar, S. and Pant, N.C., 2015. Low grade metamorphism in the Lalsot-Bayana sub-basin of the North Delhi Fold Belt and its tectonic implication. Journal of the Geological Society of India, 85, pp.397-410.
Morey GB and Southwick DL (1995) Allostratigraphic relationships of Early Proterozoic iron-formations in the Lake Superior region. Economic Geology 90: 1983–1993.
Morey, G.B. and Southwick, D.L., 1993. Stratigraphic and sedimentological factors controlling the distribution of epigenetic manganese deposits in iron-formation of the Emily District, Cuyuna Iron Range, East-Central Minnesota. Economic geology, 88(1), pp.104-122.
Morey, G.B., 1978. Lower and middle Precambrian stratigraphic nomenclature for east-central Minnesota, Minnesota Geological Survey. Report of Investigations, 21.
Mücke, A., 2005. The Nigerian manganese-rich iron-formations and their host rocks—from sedimentation to metamorphism. Journal of African Earth Sciences, 41(5), pp.407-436.
Mukhopadhyay, J., Gutzmer, J., Beukes, N.J. and Bhattacharya, H.N., 2008. Geology and genesis of the major banded iron formation-hosted high-grade iron ore deposits of India.
Ojakangas, R. W., Morey, G. B., & Southwick, D. L. (2001). Paleoproterozoic basin development and sedimentation in the Lake Superior region, North America. Sedimentary Geology, 141–142, 319–341.
Oliveira, E.P., Mello, E.F. and McNaughton, N., 2002. Reconnaissance U–Pb geochronology of Precambrian quartzites from the Caldeirão belt and their basement, NE São Francisco Craton, Bahia, Brazil: implications for the early evolution of the Paleoproterozoic Itabuna–Salvador–Curaçá orogen. Journal of South American Earth Sciences, 15(3), pp.349-362.
Oliveira, E.P., Souza, Z.S., McNaughton, N.J., Lafon, J.M., Costa, F.G. and Figueiredo, A.M., 2011. The Rio Capim volcanic–plutonic–sedimentary belt, São Francisco Craton, Brazil: Geological, geochemical and isotopic evidence for oceanic arc accretion during Palaeoproterozoic continental collision. Gondwana Research, 19(3), pp.735-750.
Oluyede, K., Ibrahim, G., Danbatta, U., Ogunleye, P. and Klötzli, U., 2021. Geochemistry and Petrogenetic Features of Metasediments in Northern Part of Kushaka and Birnin Gwari Schist Belts NW Nigeria. Geochemistry, 11(16).
Peterman, Z.E., 1966. Rb-Sr dating of Middle Precambrian metasedimentary rocks of Minnesota. Geological Society of America Bulletin, 77(10), pp.1031-1044.
Pietrzak-Renaud, N. and Davis, D., 2014. U–Pb geochronology of baddeleyite from the Belleview metadiabase: Age and geotectonic implications for the Negaunee Iron Formation, Michigan. Precambrian research, 250, pp.1-5.
Prinz, W. C. (1981). Geologic map of the Gogebic range-Watersmeet area, Gogebic and Ontonagon Counties. (No. 1365).
Pufahl, P. K., & Fralick, P. W. (2004). Depositional controls on Palaeoproterozoic iron formation accumulation, Gogebic range, Lake Supe- rior region, USA. Sedimentology, 51(4), 791–808. https://doi.org/10.1111/j.1365-3091.2004.00651.x
Pufahl, P.K., 1996. Stratigraphic architecture of a Paleoproterozoic iron formation depositional system: the Gunflint, Mesabi and Cuyuna iron ranges (Doctoral dissertation).
Pufahl, P.K., Anderson, S.L. and Hiatt, E.E., 2014. Dynamic sedimentation of Paleoproterozoic continental margin iron formation, Labrador Trough, Canada: Paleoenvironments and sequence stratigraphy. Sedimentary Geology, 309, pp.48-65.
Rasmussen, B., Bekker, A. and Fletcher, I.R., 2013. Correlation of Paleoproterozoic glaciations based on U–Pb zircon ages for tuff beds in the Transvaal and Huronian Supergroups. Earth and Planetary Science Letters, 382, pp.173-180.
Rasmussen, B., Fletcher, I.R., Bekker, A., Muhling, J.R., Gregory, C.J. and Thorne, A.M., 2012. Deposition of 1.88-billion-year-old iron formations as a consequence of rapid crustal growth. Nature, 484(7395), pp.498-501.
Redden, J.A. and DeWitt, E., 2008. Maps Showing Geology Structure and Geophysics of the Central Black Hills South Dakota (Vol. 2777, pp. 44-p). US Geological Survey.
Redden, J.A., Peterman, Z.E., Zartman, R.E., DeWitt, E., 1990. U–Th–Pb geochronology and preliminary interpretation of Precambrian tectonic events in the Black Hills, South Dakota. In: Lewry, J.F., Stauffer, M.R. (Eds.), The Early Proterozoic Trans-Hudson orogen of North America. Geological Association of Canada Special Paper. Geological Association of Canada Special Paper, pp. 229–251.
Reed, R.C. and Daniels, J., 1987. Bedrock geology of Northern Michigan: Michigan Department of Natural Resources. Geological Survey Division, scale, 1(500,000).
Roscoe SM, Gandhi SS, Charbonneau BW, Maurice YT, and Gibb RA (1987) Mineral resource assessment of the area in the East Arc (Great Slave Lake) and Artillery Lake region, N.W.T., proposed as a national park (NTS 75 J,K, L, N, O). Geological Survey of Canada, Open File 1434, 92 p.
SAKKO,M. and LAAJOKI,K., 1975. Whole rock Pb-Pb isochron age for the Pääkkö iron formation in Väyrylänkylä, South Puolanka area, Finland. Bull. Geol. Soc. Finland, 47, pp.113-116.
Sawada, H., Mugandani, E.T., Sato, T., Sawaki, Y., Sakata, S., Isozaki, Y. and Maruyama, S., 2019. Age constraints on the Palaeoproterozoic Lomagundi–Jatuli Event in Zimbabwe: Zircon geochronology of the Magondi Supergroup. Terra Nova, 31(5), pp.438-444.
Schmidt, R. G. (1980). The Marquette range Supergroup in the Gogebic iron district, Michigan and Wisconsin; B; 1460. U.S. Govt. Print. Off.
Schneider, D.A., Bickford, M.E., Cannon, W.F., Schulz, K.J. and Hamilton, M.A., 2002. Age of volcanic rocks and syndepositional iron formations, Marquette Range Supergroup: implications for the tectonic setting of Paleoproterozoic iron formations of the Lake Superior region. Canadian Journal of Earth Sciences, 39(6), pp.999-1012.
Schulz, K. J., & Cannon, W. F. (2007). The Penokean orogeny in the Lake Superior region. Precambrian Research, 157, 4–25.
Schweigart, H., 1965. Genesis of the iron ores of the Pretoria Series, South Africa. Economic Geology, 60(2), pp.269-298.
Severson, Mark J; Heine, John J; Patelke, Marsha Meinders. (2009). Geologic and Stratigraphic Controls of the Biwabik Iron Formation and the Aggregate Potential of the Mesabi Iron Range, Minnesota. University of Minnesota Duluth. Retrieved from the University of Minnesota Digital Conservancy, https://hdl.handle.net/11299/187163.
Siahi, M., Tsikos, H., Rafuza, S., Oonk, P.B., Mhlanga, X.R., van Niekerk, D., Mason, P.R. and Harris, C., 2020. Insights into the processes and controls on the absolute abundance and distribution of manganese in Precambrian iron formations. Precambrian Research, 350, p.105878.
Sims, P. K., Peterman, Z. E., Prinz, W. C., & Benedict, F. C. (1984). Geology, geochemistry, and age of Archean and Early Proterozoic rocks in the Marinesco-Watersmeet area, northern Michigan. (Paper, 1292-A, A1–A41). US Geol. Surv. Prof.
Singh, S.P., 1984. Fluvial sedimentation of the Proterozoic Alwar group in the Lalgarh graben, Northwestern India. Sedimentary Geology, 39(1-2), pp.95-119.
Southwick, D.L., Morey, G.B., Christopher, J.M., McSwiggen, P.L. and Boerboom, T.J., 2005. RI-63 Preliminary description and interpretation of the" Hattenberger" deep test well, Carlton County, Minnesota.
Taylor, C.D., Finn, C.A., Anderson, E.D., Bradley, D.C., Joud, M.Y., Taleb Mohamed, A. and Horton, J.D., 2016. The F’derik-Zouérate iron district: Mesoarchean and Paleoproterozoic iron formation of the Tiris Complex, Islamic Republic of Mauritania. Mineral Deposits of North Africa, pp.529-573.
Tsikos H, Beukes NJ, Moore JM, and Harris C (2003) Deposition, diagenesis, and secondary enrichment of metals in the Paleproterozoic Hotazel Iron Formation, Kalahari manganese field, South Africa. Economic Geology 98: 1449–1462.
Tsikos, H. and Moore, J.M., 1997. Petrography and geochemistry of the Paleoproterozoic Hotazel Iron-Formation, Kalahari manganese field, South Africa; implications for Precambrian manganese metallogenesis. Economic Geology, 92(1), pp.87-97.
Tsikos, H., 1999. Petrographic and geochemical constraints on the origin and post-depositional history of the Hotazel iron-manganese deposits, Kalahari Manganese Field, South Africa (Doctoral dissertation, Rhodes University).
Vafeas, N.A., Blignaut, L.C., Viljoen, K.S. and Meffre, S., 2018. New evidence for the early onset of supergene alteration along the Kalahari unconformity. South African Journal of Geology, 121(2), pp.157-170.
Wang, C., Zhang, L., Dai, Y. and Lan, C., 2015. Geochronological and geochemical constraints on the origin of clastic meta-sedimentary rocks associated with the Yuanjiacun BIF from the Lüliang Complex, North China. Lithos, 212, pp.231-246.
Wang, Kurt O. Konhauser; Lianchang Zhang, Depositional Environment of the Paleoproterozoic Yuanjiacun Banded Iron Formation in Shanxi Province, China Economic Geology (2015) 110 (6): 1515–1539. https://doi.org/10.2113/econgeo.110.6.1515
Wardle, R.J., 1982. Geology of the eastern margin of the Labrador Trough Newfound- land Mineral Development Division Map 82-5. St. John’s, Newfoundland, Scale 1:100,000.
Zaleski, E., van Breemen, O. and Peterson, V.L., 1999. Geological evolution of the Manitouwadge greenstone belt and Wawa-Quetico subprovince boundary, Superior Province, Ontario, constrained by U-Pb zircon dates of supracrustal and plutonic rocks. Canadian Journal of Earth Sciences, 36(6), pp.945-966.
Zhu, J., Zhang, F. and Xu, K., 1988. Depositional environment and metamorphism of Early Proterozoic iron formation in the Lüliangshan region, Shanxi Province, China. Precambrian Research, 39(1-2), pp.39-50.
Zajac, I. S. (1974). The stratigraphy and mineralogy of the Sokoman Formation in the Knob Lane Area, geological Survey of Canada Bulletin, 220, 159.

## Sheet: Fig 3b-LIPs July 22
Name from Ernst	Age from Ernst	M ean	Max age	Min age	Size (Mkm2	Size Km2			Name from Ernst	M ean	Max age	Min age	Size (Mkm2	Size Km2			Name from Ernst	M ean	Max age	Min age	Size (Mkm2	Size Km2			Table 7-ISLEY
C Black Hills-Soutpansberg [Kalahari craton] (Olsson et al., 2016)	1880–1840	1860	1880	1840	0.04	40000	6990000		C Kalaro-Nimnyrsky-Malozadoiskii [s Siberian craton]	1870	1870	1870	0.58	580000	6990000		C Black Hills-Soutpansberg [Kalahari craton] (Olsson et al., 2016)	1860	1880	1840	0.04	40000	6990000		Minimum and maximum size of superplume eras and events
C Kalaro-Nimnyrsky-Malozadoiskii [s Siberian craton]	1870	1870	1870	1870	0.58	580000	6950000		C Black Hills-Soutpansberg [Kalahari craton] (Olsson et al., 2016)	1860	1880	1840	0.04	40000	6410000		C Kalaro-Nimnyrsky-Malozadoiskii [s Siberian craton]	1870	1870	1870	0.58	580000	6950000
C Circum-Superior (Chukotat, Labrador, Molson-Thompson, Pickle Crow portions) [Superior craton]	1885–1870	1877.5	1885	1870	0.2	200000	6370000		C Mashonaland [Kalahari craton]	1880	1880	1880	0.18	180000	6370000		C Circum-Superior (Chukotat, Labrador, Molson-Thompson, Pickle Crow portions) [Superior craton]	1877.5	1885	1870	0.2	200000	6370000		Name	Age,	Error	Area,	Event	Min. area,	Max. area,
C Ghost-Mara River- Morel [Slave craton]	1890–1870	1880	1890	1870	0.21	210000	6170000		S Uatuma [Amazonia] (Teixeira et al., 2019b)	1880	1880	1880	1.5	1500000	6190000		C Ghost-Mara River- Morel [Slave craton]	1880	1890	1870	0.21	210000	6170000			Ma		km2	no	km2	km2
C Mashonaland [Kalahari craton]	1880	1880	1880	1880	0.18	180000	5960000		C Circum-Superior (Chukotat, Labrador, Molson-Thompson, Pickle Crow portions) [Superior craton]	1877.5	1885	1870	0.2	200000	4690000		C Frobisher Suite M-UM event [Meta-Incognito block] (Liikane et al., 2017)	1920	1970	1870	0.07	70000	5960000									Age min	Age max	Cumulative area
S Uatuma [Amazonia] (Teixeira et al., 2019b)	1880	1880	1880	1880	1.5	1500000	5780000		C Ghost-Mara River- Morel [Slave craton]	1880	1890	1870	0.21	210000	4490000		C Mashonaland [Kalahari craton]	1880	1880	1880	0.18	180000	5890000		Dharmapuri dikes	1822	42	737000	NI:(17)	410000	737000	1780	1864	61743000
C Bastanar-Hampi [Indian craton] (Samal et al., 2019)	1890	1890	1890	1890	0.18	180000	4280000		C Bastanar-Hampi [Indian craton] (Samal et al., 2019)	1890	1890	1890	0.18	180000	4280000		S Uatuma [Amazonia] (Teixeira et al., 2019b)	1880	1880	1880	1.5	1500000	5710000		Cuthbert Dikes (younger Molson)	1882.8	2.3	1060000	18	1060000	1060000	1880.5	1885.1	61006000
C Hearne [Slave craton]	1900	1900	1900	1900	0.04	40000	4100000		C Hearne [Slave craton]	1900	1900	1900	0.04	40000	4100000		C Bastanar-Hampi [Indian craton] (Samal et al., 2019)	1890	1890	1890	0.18	180000	4210000		Avayalik dikes	1890.5	2.5	2950000	19	2950000	2950000	1888	1893	59946000
C Frobisher Suite M-UM event [Meta-Incognito block] (Liikane et al., 2017)	ca. 1920	1920	1970	1870	0.07	70000	4060000		C Hartley (Tsineng, Moshaneng) [Kalahari craton] (Semami Alebouyeh et al., 2016)	1920	1930	1910	0.27	270000	4060000		C Hearne [Slave craton]	1900	1900	1900	0.04	40000	4030000		Onega plateau flows	1975	24	42600000	NI:19a	42600000	42600000	1951	1999	56996000
C Hartley (Tsineng, Moshaneng) [Kalahari craton] (Semami Alebouyeh et al., 2016)	1930–1910	1920	1930	1910	0.27	270000	3990000		C Xuwujia [North China craton] (Peng, 2015)	1945	1960	1930	0.03	30000	3790000		C Hartley (Tsineng, Moshaneng) [Kalahari craton] (Semami Alebouyeh et al., 2016)	1920	1930	1910	0.27	270000	3990000		Kennedy dikes	2010	10	737000	NI:19b	737000	737000	2000	2020	14396000
C Xuwujia [North China craton] (Peng, 2015)	1960–1930	1945	1960	1930	0.03	30000	3720000		C Frobisher Suite M-UM event [Meta-Incognito block] (Liikane et al., 2017)	1920	1970	1870	0.07	70000	3760000		C Xuwujia [North China craton] (Peng, 2015)	1945	1960	1930	0.03	30000	3720000		Lac de Gras dikes	2026.5	3.5	737000	NI:19c	737000	737000	2023	2030	13659000
C Khajuraho (Jhansi) [Bundelkhand craton] (Samal et al., 2019)	1970	1970	1970		0.02	20000	3690000		C Khajuraho (Jhansi) [Bundelkhand craton] (Samal et al., 2019)	1970	1970		0.02	20000	3690000		S Orocaima [Amazonia] (Teixeira et al., 2019b)	1970	1980	1960	0.2	200000	3690000		Kangamuit younger dikes	2039.5	1.5	737000	20	737000	737000	2038	2041	12922000
C Pechenga-Onega [Karelian craton] (Lubnina et al., 2016; Davey, 2019)	1970	1970	1970	1970	0.5	500000	3670000		C Pechenga-Onega [Karelian craton] (Lubnina et al., 2016; Davey, 2019)	1970	1970	1970	0.5	500000	3670000		C Pechenga-Onega [Karelian craton] (Lubnina et al., 2016; Davey, 2019)	1970	1970	1970	0.5	500000	3490000		Ft. Frances dikes	2076.5	4.5	737000	NI:20a	737000	737000	2072	2081	12185000
C Xiwangshan [North China craton] (Peng, 2015)	1970	1970	1970	1970	0.01	10000	3170000		C Xiwangshan [North China craton] (Peng, 2015)	1970	1970	1970	0.01	10000	3170000		C Xiwangshan [North China craton] (Peng, 2015)	1970	1970	1970	0.01	10000	2990000		Kovero-Koli dikes	2113	4	737000	21	1470000	3270000	2109	2117	11448000
S Orocaima [Amazonia] (Teixeira et al., 2019b)	1980–1960	1970	1980	1960	0.2	200000	3160000		S Orocaima [Amazonia] (Teixeira et al., 2019b)	1970	1980	1960	0.2	200000	3160000		C Khajuraho (Jhansi) [Bundelkhand craton] (Samal et al., 2019)	1970	1970	1970	0.02	20000	2980000		Marathon dikes	2114.5	10.5	737000	21	737000		2104	2125	10711000
C, O Minto-Povungnituk-Eskimo [Superior craton] (Kastek et al., 2018; Hamilton et al., 2016)	1998	1998	1998	1998	0.44	440000	2960000		C, O Minto-Povungnituk-Eskimo [Superior craton] (Kastek et al., 2018; Hamilton et al., 2016)	1998	1998	1998	0.44	440000	2960000		C, O Minto-Povungnituk-Eskimo [Superior craton] (Kastek et al., 2018; Hamilton et al., 2016)	1998	1998	1998	0.44	440000	2960000		Kenora-Kabetogama dikes	2120	67	1060000	NI(21)			2053	2187	9974000
C Kennedy [Wyoming craton]	2010	2010	2010	2010	0.01	10000	2520000		C Kennedy [Wyoming craton]	2010	2010	2010	0.01	10000	2520000		C Kennedy [Wyoming craton]	2010	2010	2010	0.01	10000	2520000		Pippolanmaki-Kutsu dikes	2123	10	737000	NI(21)			2113	2133	8914000
C Lac de Gras-Booth River Igneous Complex (BRIC) [Slave craton]	2027–2023	2025	2027	2023	0.07	70000	2510000		C Lac de Gras-Booth River Igneous Complex (BRIC) [Slave craton]	2025	2027	2023	0.07	70000	2510000		C Lac de Gras-Booth River Igneous Complex (BRIC) [Slave craton]	2025	2027	2023	0.07	70000	2510000		Cauchon (older Molson) dikes	2145	25	1060000	NI(22)			2120	2170	8177000
C Kangamuit-MD3 [North Atlantic craton]	2050–2030	2040	2050	2030	0.09	90000	2440000		C Kangamuit-MD3 [North Atlantic craton]	2040	2050	2030	0.09	90000	2440000		C Kangamuit-MD3 [North Atlantic craton]	2040	2050	2030	0.09	90000	2440000		Biscotasing dikes	2166.7	1.4	4610000	22	4610000	5670000	2165.3	2168.1	7117000
C Bushveld [Kaapvaal craton]	2060	2060	2060	2060	0.39	390000	2350000		C Bushveld [Kaapvaal craton]	2060	2060	2060	0.39	390000	2350000		C Bushveld [Kaapvaal craton]	2060	2060	2060	0.39	390000	2350000		Birrimian flows	2183.7	6.7	110000	NI:22a	110000	110000	2177	2190.4	2507000
C Yixingzhai [North China craton] (Peng, 2015)	2060	2060	2060	2060	0.01	10000	1960000		C Yixingzhai [North China craton] (Peng, 2015)	2060	2060	2060	0.01	10000	1960000		C Yixingzhai [North China craton] (Peng, 2015)	2060	2060	2060	0.01	10000	1960000		Wyoming Bighorn II dikes	2200	35	1660000	NI:(23)			2165	2235	2397000
C Lac Esprit [Superior craton]	2070	2070	2070	2070	0.07	70000	1950000		C Lac Esprit [Superior craton]	2070	2070	2070	0.07	70000	1950000		C Lac Esprit [Superior craton]	2070	2070	2070	0.07	70000	1950000		Klotz basic dikes	2209	2	737000	23	737000	6080000	2207	2211	737000
C Voronezh [Sarmatia]	2070	2070	2070	2070	0.2	200000	1880000		C Voronezh [Sarmatia]	2070	2070	2070	0.2	200000	1880000		C Voronezh [Sarmatia]	2070	2070	2070	0.2	200000	1880000
C Fort Frances [Superior craton]	2075	2075	2075	2075	0.17	170000	1680000		C Fort Frances [Superior craton]	2075	2075	2075	0.17	170000	1680000		C Cauchon [Superior craton]	2080	2090	2070	0.02	20000	1680000
C Devarabanda [Dharwar craton] (Söderlund et al., 2019)	2080	2080	2080	2080	0.07	70000	1510000		C Devarabanda [Dharwar craton] (Söderlund et al., 2019)	2080	2080	2080	0.07	70000	1510000		C Fort Frances [Superior craton]	2075	2075	2075	0.17	170000	1660000
C Cauchon [Superior craton]	2090 & 2070	2080	2090	2070	0.02	20000	1440000		C Cauchon [Superior craton]	2080	2090	2070	0.02	20000	1440000		C Devarabanda [Dharwar craton] (Söderlund et al., 2019)	2080	2080	2080	0.07	70000	1490000									Age min	Age max	Cumulative area									Age min	Age max	Cumulative area
C Snowy Pass [Wyoming craton]	2100–2080	2090	2100	2080	0.01	10000	1420000		C Snowy Pass [Wyoming craton]	2090	2100	2080	0.01	10000	1420000		C Snowy Pass [Wyoming craton]	2090	2100	2080	0.01	10000	1420000		Dharmapuri dikes	1822	42	737000	NI:(17)	410000	737000	1780	1864	61743000		Dharmapuri dikes	1822	42	737000	NI:(17)	410000	737000	1780	1864	61743000
C Marathon [Superior craton]	2120–2100	2110	2120	2100	0.16	160000	1410000		C Bear Mountain [Wyoming craton]	2115	2115		0.02	20000	1410000		C Marathon [Superior craton]	2110	2120	2100	0.16	160000	1410000		Cuthbert Dikes (younger Molson)	1882.8	2.3	1060000	18	1060000	1060000	1880.5	1885.1	61006000		Cuthbert Dikes (younger Molson)	1882.8	2.3	1060000	18	1060000	1060000	1880.5	1885.1	61006000
C Griffin-Kazan-Chipman [Hearne & Rae cratons] (Regan et al., 2017; Buchan & Ernst, 2020)	2116–2111	2113.5	2116	2111	0.14	140000	1250000		C Tommajarvi-Pirtguba [Karelian craton] (Davey, 2019; Davey et al., 2020)	2115	2115		0.11	110000	1390000		C Indin [Slave craton]	2117	2126	2108	0.04	40000	1250000		Avayalik dikes	1890.5	2.5	2950000	19	2950000	2950000	1888	1893	59946000		Avayalik dikes	1890.5	2.5	2950000	19	2950000	2950000	1888	1893	59946000
C Bear Mountain [Wyoming craton]	2115	2115	2115		0.02	20000	1110000		C Griffin-Kazan-Chipman [Hearne & Rae cratons] (Regan et al., 2017; Buchan & Ernst, 2020)	2113.5	2116	2111	0.14	140000	1280000		C Tikkigatsiagak-Avakutak [North Atlantic craton] (Sahin & Hamilton, 2019)	2125	2140	2110	0.01	10000	1210000		Onega plateau flows	1975	24	42600000	NI:19a	42600000	42600000	1951	1999	56996000		Onega plateau flows	1975	24	42600000	NI:19a	42600000	42600000	1951	1999	56996000
C Tommajarvi-Pirtguba [Karelian craton] (Davey, 2019; Davey et al., 2020)	2115	2115	2115		0.11	110000	1090000		C Marathon [Superior craton]	2110	2120	2100	0.16	160000	1140000		C Griffin-Kazan-Chipman [Hearne & Rae cratons] (Regan et al., 2017; Buchan & Ernst, 2020)	2113.5	2116	2111	0.14	140000	1200000		Kennedy dikes	2010	10	737000	NI:19b	737000	737000	2000	2020	14396000		Kennedy dikes	2010	10	737000	NI:19b	737000	737000	2000	2020	14396000
C Indin [Slave craton]	2126–2108	2117	2126	2108	0.04	40000	980000		C Indin [Slave craton]	2117	2126	2108	0.04	40000	980000		C Bear Mountain [Wyoming craton]	2115	2115	2115	0.02	20000	1060000		Lac de Gras dikes	2026.5	3.5	737000	NI:19c	737000	737000	2023	2030	13659000		Lac de Gras dikes	2026.5	3.5	737000	NI:19c	737000	737000	2023	2030	13659000
C Tikkigatsiagak-Avakutak [North Atlantic craton] (Sahin & Hamilton, 2019)	2140–2110	2125	2140	2110	0.01	10000	940000		C Tikkigatsiagak-Avakutak [North Atlantic craton] (Sahin & Hamilton, 2019)	2125	2140	2110	0.01	10000	940000		C Tommajarvi-Pirtguba [Karelian craton] (Davey, 2019; Davey et al., 2020)	2115	2115	2115	0.11	110000	1040000		Kangamuit younger dikes	2039.5	1.5	737000	20	737000	737000	2038	2041	12922000		Kangamuit younger dikes	2039.5	1.5	737000	20	737000	737000	2038	2041	12922000
C Rantavaara [Karelia-Kola craton] (Davey, 2019)	2150	2150	2150	2150	0.04	40000	930000		C Rantavaara [Karelia-Kola craton] (Davey, 2019)	2150	2150	2150	0.04	40000	930000		C Rantavaara [Karelia-Kola craton] (Davey, 2019)	2150	2150	2150	0.04	40000	930000		Kenora-Kabetogama dikes	2120	67	1060000	NI(21)			2053	2187	12185000		Ft. Frances dikes	2076.5	4.5	737000	NI:20a	737000	737000	2072	2081	12185000
C Riviere du Gue [Superior craton]	2150	2150	2150	2150	0.07	70000	890000		C Riviere du Gue [Superior craton]	2150	2150	2150	0.07	70000	890000		C Riviere du Gue [Superior craton]	2150	2150	2150	0.07	70000	890000		Ft. Frances dikes	2076.5	4.5	737000	NI:20a	737000	737000	2072	2081	11125000		Kovero-Koli dikes	2113	4	737000	21	1470000	3270000	2109	2117	11448000
C Biscotasing-Payne River [Superior craton] (Hamilton et al., 2017)	2172–2167	2169.5	2172	2167	0.45	450000	820000		C Biscotasing-Payne River [Superior craton] (Hamilton et al., 2017)	2169.5	2172	2167	0.45	450000	820000		C Biscotasing-Payne River [Superior craton] (Hamilton et al., 2017)	2169.5	2172	2167	0.45	450000	820000		Marathon dikes	2114.5	10.5	737000	21	737000		2104	2125	10388000		Marathon dikes	2114.5	10.5	737000	21	737000		2104	2125	10711000
C Mahbubngour-Dandeli [Dharwar craton] (Söderlund et al., 2019)	2180	2180	2180	2180	0.29	290000	370000		C Mahbubngour-Dandeli [Dharwar craton] (Söderlund et al., 2019)	2180	2180	2180	0.29	290000	370000		C Mahbubngour-Dandeli [Dharwar craton] (Söderlund et al., 2019)	2180	2180	2180	0.29	290000	370000
C SW Slave Magmaatic Province (Dogrib) [Slave craton]	2193–2180	2186.5	2193	2180	0.04	40000	80000		C Tulemalu-MacQuoid [Rae craton]	2190	2190	2190	0.04	40000	80000		C SW Slave Magmaatic Province (Dogrib) [Slave craton]	2186.5	2193	2180	0.04	40000	80000		Pippolanmaki-Kutsu dikes	2123	10	737000	NI(21)			2113	2133	8914000		Biscotasing dikes	2166.7	1.4	4610000	22	4610000	5670000	2165.3	2168.1	9237000
C Tulemalu-MacQuoid [Rae craton]	2190	2190	2190	2190	0.04	40000	40000		C SW Slave Magmaatic Province (Dogrib) [Slave craton]	2186.5	2193	2180	0.04	40000	40000		C Tulemalu-MacQuoid [Rae craton]	2190	2190	2190	0.04	40000	40000
																									Wyoming Bighorn II dikes	2200	35	1660000	NI:(23)			2165	2235	7117000		Kenora-Kabetogama dikes	2120	67	1060000	NI(21)			2053	2187	3567000
if ca, use +- 50 Ma as error																									Biscotasing dikes	2166.7	1.4	4610000	22	4610000	5670000	2165.3	2168.1	5457000		Birrimian flows	2183.7	6.7	110000	NI:22a	110000	110000	2177	2190.4	2507000
																									Birrimian flows	2183.7	6.7	110000	NI:22a	110000	110000	2177	2190.4	847000		Klotz basic dikes	2209	2	737000	23	737000	6080000	2207	2211	2397000
																									Klotz basic dikes	2209	2	737000	23	737000	6080000	2207	2211	737000		Wyoming Bighorn II dikes	2200	35	1660000	NI:(23)			2165	2235	1660000
Name from Ernst	Age from Ernst	M ean	Max age	Min age	Size (Mkm2	Size Km2
C Kalaro-Nimnyrsky-Malozadoiskii [s Siberian craton]	1870	1870			0.58	580000
C Black Hills-Soutpansberg [Kalahari craton] (Olsson et al., 2016)	1880–1840	1860	1880	1840	0.04	40000
C Circum-Superior (Chukotat, Labrador, Molson-Thompson, Pickle Crow portions) [Superior craton]	1885–1870	1877.5	1885	1870	0.2	200000
C Ghost-Mara River- Morel [Slave craton]	1890–1870	1880	1890	1870	0.21	210000
C Mashonaland [Kalahari craton]	1880	1880			0.18	180000
C Bastanar-Hampi [Indian craton] (Samal et al., 2019)	1890	1890			0.18	180000
S Uatuma [Amazonia] (Teixeira et al., 2019b)	1880	1880			1.5	1500000																			Cauchon (older Molson) dikes	2145	25	1060000	NI(22)			2120	2170	8177000		Cauchon (older Molson) dikes	2145	25	1060000	NI(22)			2120	2170	4627000
C Hearne [Slave craton]	1900	1900			0.04	40000																			Kovero-Koli dikes	2113	4	737000	21	1470000	3270000	2109	2117	9651000		Pippolanmaki-Kutsu dikes	2123	10	737000	NI(21)			2113	2133	9974000
C Frobisher Suite M-UM event [Meta-Incognito block] (Liikane et al., 2017)	ca. 1920	1920	1970	1870	0.07	70000
C Hartley (Tsineng, Moshaneng) [Kalahari craton] (Semami Alebouyeh et al., 2016)	1930–1910	1920	1930	1910	0.27	270000
C Xuwujia [North China craton] (Peng, 2015)	1960–1930	1945	1960	1930	0.03	30000
C Khajuraho (Jhansi) [Bundelkhand craton] (Samal et al., 2019)	1970	1970			0.02	20000
C Pechenga-Onega [Karelian craton] (Lubnina et al., 2016; Davey, 2019)	1970	1970			0.5	500000
C Xiwangshan [North China craton] (Peng, 2015)	1970	1970			0.01	10000
S Orocaima [Amazonia] (Teixeira et al., 2019b)	1980–1960	1970	1980	1960	0.2	200000
C, O Minto-Povungnituk-Eskimo [Superior craton] (Kastek et al., 2018; Hamilton et al., 2016)	1998	1998			0.44	440000
C Kennedy [Wyoming craton]	2010	2010			0.01	10000
C Lac de Gras-Booth River Igneous Complex (BRIC) [Slave craton]	2027–2023	2025	2027	2023	0.07	70000
C Kangamuit-MD3 [North Atlantic craton]	2050–2030	2040	2050	2030	0.09	90000
C Bushveld [Kaapvaal craton]	2060	2060			0.39	390000
C Yixingzhai [North China craton] (Peng, 2015)	2060	2060			0.01	10000
C Lac Esprit [Superior craton]	2070	2070			0.07	70000
C Voronezh [Sarmatia]	2070	2070			0.2	200000
C Fort Frances [Superior craton]	2075	2075			0.17	170000
C Palomaa [Karelian craton] (Davey, 2019; Davey et al., 2020)	2070	2070			—
C Devarabanda [Dharwar craton] (Söderlund et al., 2019)	2080	2080			0.07	70000
C Cauchon [Superior craton]	2090 & 2070	2080	2090	2070	0.02	20000
C Snowy Pass [Wyoming craton]	2100–2080	2090	2100	2080	0.01	10000
C Griffin-Kazan-Chipman [Hearne & Rae cratons] (Regan et al., 2017; Buchan & Ernst, 2020)	2116–2111	2113.5	2116	2111	0.14	140000
C Bear Mountain [Wyoming craton]	2115	2115			0.02	20000
C Tommajarvi-Pirtguba [Karelian craton] (Davey, 2019; Davey et al., 2020)	2115	2115			0.11	110000
C Marathon [Superior craton]	2120–2100	2110	2120	2100	0.16	160000
C Indin [Slave craton]	2126–2108	2117	2126	2108	0.04	40000
C Tikkigatsiagak-Avakutak [North Atlantic craton] (Sahin & Hamilton, 2019)	2140–2110	2125	2140	2110	0.01	10000
C Rantavaara [Karelia-Kola craton] (Davey, 2019)	2150	2150			0.04	40000
C Riviere du Gue [Superior craton]	2150	2150			0.07	70000
C Biscotasing-Payne River [Superior craton] (Hamilton et al., 2017)	2172–2167	2169.5	2172	2167	0.45	450000
C Mahbubngour-Dandeli [Dharwar craton] (Söderlund et al., 2019)	2180	2180			0.29	290000
C SW Slave Magmaatic Province (Dogrib) [Slave craton]	2193–2180	2186.5	2193	2180	0.04	40000
C Tulemalu-MacQuoid [Rae craton]	2190	2190			0.04	40000

## Sheet: Fig 3c. Condie- crust June 22
	Supplemental Table 2. Juvenile Crust in Orogens							Md = median
																						Orogen	Median Felsic Age (Ma) (onset subduction?)	± 1 s	Maximum age	Minimum age	No of analyses	Onset deformation or acccretion (Ma)	End deformation or accretion (Ma)*	Duration (Myr)	orogen length (km)	Juvenile Md length based (km)		± 1 s	Cumulative min length					Orogen	Median Felsic Age (Ma) (onset subduction?)	± 1 s	Maximum age				Minimum age	No of analyses	Onset deformation or acccretion (Ma)
	Orogen	Orogen phase	Median Felsic Age (Ma) (onset subduction?)	± 1 s	Maximum age	Minimum age	No of analyses	Onset deformation or acccretion (Ma)	End deformation or accretion (Ma)*	Duration (Myr)	orogen length (km)	Median eNd(t)	Juvenile Md sample based	± 1 s	Juvenile Md length based (km)	± 1 s	Maximum length	Minimum length				Vulcan British Columbia	1824	14	1852	1796	8	1840	1780	60	800	484.8	26616.3	136	32340				Siberia	Akitkan, Siberia	1860	157	2174				1546	49	1900
	Vulcan British Columbia	co	1824	14	1838	1810	8	1840	1780	60	800	-8.2	0.606	0.17	484.8	136	620.8	348.8			Laurentia	Trans-Hudson	1850	13	1876	1824	38	1830	1800	30	3200	3116.8	26131.5	160	31540				West Australia	Glenburgh	1989	179	2347				1631	19	1965
Laurentia	Trans-Hudson	ac	1850	13	1863	1837	38	1830	1800	30	3200	3	0.974	0.05	3116.8	160	3276.8	2956.8			Laurentia	Penokean	1850	29	1908	1792	25	1880	1830	50	1000	892	23014.8	179	28340				Kalahari	Ubendian, E Africa	1867	112	2091				1643	12	1880
Laurentia	Penokean	ac	1850	29	1879	1821	25	1880	1830	50	1000	-1	0.892	0.179	892	179	1071	713			South China	Cathaysia	1850	0	1850	1850	10	1890	1830	60	1500	1054.5	22122.8	555	27340				Australia	Mt Isa	1862	100	2062				1662	13	1875
South China	Cathaysia	co	1850	0	1850	1850	10	1890	1830	60	1500	-6	0.703	0.37	1054.5	555	1609.5	499.5			Australia	Halls Creek, NW Australia	1858	4.5	1867	1849	8	1850	1820	30	950	764.8	21068.2	16.2	25840				Proto-baltica	Svecofennian	1885	103	2091				1679	254	1900
Australia	Halls Creek, NW Australia	co	1858	4.5	1862.5	1853.5	8	1850	1820	30	950	-4	0.805	0.017	764.8	16.2	781	748.6			Siberia	Akitkan, Siberia	1860	157	2174	1546	49	1900	1870	30	2200	1716	20303.5	253	24890				Rae Hearne	Taltson-Thalon, W Canada	1968	96	2160				1776	38	1985
Siberia	Akitkan, Siberia	co	1860	157	2017	1703	49	1900	1870	30	2200	-4	0.78	0.115	1716	253	1969	1463			Australia	Mt Isa	1862	100	2062	1662	13	1875	1845	30	860	740.5	18587.5	39.6	22690				South Africa	West Congo	2100	162	2424				1776	25	2100
Australia	Mt Isa	ac	1862	100	1962	1762	13	1875	1845	30	860	-2	0.861	0.046	740.5	39.6	780.1	700.9			Kalahari	Ubendian, E Africa	1867	112	2091	1643	12	1880	1850	30	1000	936	17847	107	21830				China	Trans-North China	2100	157	2414				1786	42	1890
Kalahari	Ubendian, E Africa	ac	1867	112	1979	1755	12	1880	1850	30	1000	1	0.936	0.107	936	107	1043	829			Proto-baltica	Svecofennian	1885	103	2091	1679	254	1900	1650	250	1800	1647	16911	241.2	20830				Laurentia	Penokean	1850	29	1908				1792	25	1880
Proto-baltica	Svecofennian	ac	1885	103	1988	1782	254	1900	1650	250	1800	0	0.915	0.134	1647	241.2	1888.2	1405.8			Labrador	Torngat	1900	0	1900	1900	27	1869	1844	25	700	586.6	15264	95.9	19030					Vulcan British Columbia	1824	14	1852				1796	8	1840
Labrador	Torngat	ac	1900	0	1900	1900	27	1869	1844	25	700	-3	0.838	0.137	586.6	95.9	682.5	490.7			Siberia	Sutam, Aldan shield	1900	20	1940	1860	7	1900	1850	50	1300	1093.3	14677.4	274.3	18330				Greenland	Nagssugtoqidian	1920	56	2032				1808	17	1870
Siberia	Sutam, Aldan shield	co	1900	20	1920	1880	7	1900	1850	50	1300	-1.9	0.841	0.211	1093.3	274.3	1367.6	819			Greenland	Nagssugtoqidian	1920	56	2032	1808	17	1870	1840	30	900	783	13584.1	153	17030					Central Russian	1998	87	2172				1824	9	1800
Greenland	Nagssugtoqidian	ac	1920	56	1976	1864	17	1870	1840	30	900	-1	0.87	0.17	783	153	936	630			Proto-baltica	Lapland-Kola	1960	60	2080	1840	28	1920	1870	50	950	841.7	12801.1	138.7	16130				Laurentia	Trans-Hudson	1850	13	1876				1824	38	1830
Proto-baltica	Lapland-Kola	ac	1960	60	2020	1900	28	1920	1870	50	950	-1	0.886	0.146	841.7	138.7	980.4	703			Rae Hearne	Taltson-Thalon, W Canada	1968	96	2160	1776	38	1985	1930	55	2000	1464	11959.4	18	15180				Proto-baltica	Lapland-Kola	1960	60	2080				1840	28	1920
Rae Hearne	Taltson-Thalon, W Canada	co	1968	96	2064	1872	38	1985	1930	55	2000	-5	0.732	0.009	1464	18	1482	1446			West Australia	Glenburgh	1989	179	2347	1631	19	1965	1940	25	1000	744	10495.4	110	13180				Australia	Halls Creek, NW Australia	1858	4.5	1867				1849	8	1850
West Australia	Glenburgh	co	1989	179	2168	1810	19	1965	1940	25	1000	-5	0.744	0.11	744	110	854	634				Central Russian	1998	87	2172	1824	9	1800	1780	20	2100	1999.2	9751.35	37.8	12180				South China	Cathaysia	1850	0	1850				1850	10	1890
	Central Russian	ac	1998	87	2085	1911	9	1800	1780	20	2100	2	0.952	0.018	1999.2	37.8	2037	1961.4			South Africa	Magondi-Kheis	1998	45	2088	1908	13	2040	1960	80	1930	1777.5	7752.15	482.5	10080				Siberia	Sutam, Aldan shield	1900	20	1940				1860	7	1900
China	Trans-North China	ac	2100	157	2257	1943	42	1890	1850	40	1450	2	0.955	0.008	1384.75	11.6	1396.35	1373.15			China	Trans-North China	2100	157	2414	1786	42	1890	1850	40	1450	1384.75	5974.65	11.6	8150				Labrador	Torngat	1900	0	1900				1900	27	1869
Rae Hearne	Wopmay extension	ac	2101	12	2113	2089	8	1900	1800	100	1500	1	0.928	0.058	1392	87	1479	1305			South Africa	West Congo	2100	162	2424	1776	25	2100	2000	100	2700	2192.4	4589.9	59.4	6700				South Africa	Magondi-Kheis	1998	45	2088				1908	13	2040
South Africa	Magondi-Kheis	ac	1998	45	2043	1953	13	2040	1960	80	1930	0	0.921	0.25	1777.5	482.5	2260	1295			South America-west africa	Birimian-Transamazonian accretionary	2100	31	2162	2038	164	2150	1980	170	2500	2397.5	2397.5	75	4000				South America-west africa	Birimian-Transamazonian accretionary	2100	31	2162				2038	164	2150
South Africa	West Congo	co	2100	162	2262	1938	25	2100	2000	100	2700	-3	0.812	0.022	2192.4	59.4	2251.8	2133			Rae Hearne	Wopmay extension	2101	12	2125	2077	8	1900	1800	100	1500	1392	1392	87	1500				Rae Hearne	Wopmay extension	2101	12	2125				2077	8	1900
South America-west africa	Birimian-Transamazonian accretionary	ac	2100	31	2131	2069	164	2150	1980	170	2500	2	0.959	0.03	2397.5	75	2472.5	2322.5
North China	1, Khondalite Belt;
North China	2, Jiao-Liao-Ji Belt;
India	4, Central Indian tectonic zone;
South Africa	5, Limpopo Belt;
Austraila	6, Capricorn Orogen;
East Antarctica	8, Transantarctic Orogen;
Cape Smith belt	14, Ungava Orogen;
Labrador Trough	15, New Quebec Orogen;
Baltica-Russia	19, Volhyn-Central Russian Orogen;
Baltica-Russia	20, –Pachelma Orogen;
South America-west africa	22, Eburnean Orogen
[truncated: 52 more columns]

## Sheet: Raw LIP Ernst 2021 compilation
Name from Ernst	Age from Ernst	M ean	Max age	Min age	Size (Mkm2	Size Km2
C Kalaro-Nimnyrsky-Malozadoiskii [s Siberian craton]	1870	1870			0.58	580000
C Black Hills-Soutpansberg [Kalahari craton] (Olsson et al., 2016)	1880–1840	1860	1880	1840	0.04	40000
C Circum-Superior (Chukotat, Labrador, Molson-Thompson, Pickle Crow portions) [Superior craton]	1885–1870	1877.5	1885	1870	0.2	200000
C Ghost-Mara River- Morel [Slave craton]	1890–1870	1880	1890	1870	0.21	210000
C Mashonaland [Kalahari craton]	1880	1880			0.18	180000
C Ramah Group [Nain portion, North Atlantic craton] (Sahin & Hamilton, 2019)	1890	1890			—
C Bastanar-Hampi [Indian craton] (Samal et al., 2019)	1890	1890			0.18	180000
C Boonadgin [Yilgarn craton] (Stark et al., 2019)	1890	1890			—
S Uatuma [Amazonia] (Teixeira et al., 2019b)	1880	1880			1.5	1500000
C Maria-Carajas-Tucumã [Amazonia] (Teixeira et al., 2019a,b)	1880	1880			—
Oa Flin Flon (Churchill Province) (Stern et al., 1995; Doucet et al., 2020)	ca. 1900	1900	1950	1850	—
C Hearne [Slave craton]	1900	1900			0.04	40000
C Frobisher Suite M-UM event [Meta-Incognito block] (Liikane et al., 2017)	ca. 1920	1920	1970	1870	0.07	70000
C Hartley (Tsineng, Moshaneng) [Kalahari craton] (Semami Alebouyeh et al., 2016)	1930–1910	1920	1930	1910	0.27	270000
C Angaul [Siberian craton] (Donsakaya et al., 2018)	1915	1915			—
C Mugford [Nain portion, North Atlantic craton]	1950	1950			—
C Xuwujia [North China craton] (Peng, 2015)	1960–1930	1945	1960	1930	0.03	30000
C Khajuraho (Jhansi) [Bundelkhand craton] (Samal et al., 2019)	1970	1970			0.02	20000
C Pechenga-Onega [Karelian craton] (Lubnina et al., 2016; Davey, 2019)	1970	1970			0.5	500000
C Xiwangshan [North China craton] (Peng, 2015)	1970	1970			0.01	10000
S Orocaima [Amazonia] (Teixeira et al., 2019b)	1980–1960	1970	1980	1960	0.2	200000
C Moi Moi–Charlie-Lucie [Amazonia] (Teixeira et al., 2019b; Klaver et al., 2016)	1985–1975	1980	1985	1975	—
C, O Minto-Povungnituk-Eskimo [Superior craton] (Kastek et al., 2018; Hamilton et al., 2016)	1998	1998			0.44	440000
C Kennedy [Wyoming craton]	2010	2010			0.01	10000
C Lac de Gras-Booth River Igneous Complex (BRIC) [Slave craton]	2027–2023	2025	2027	2023	0.07	70000
C Cheela Springs [West Australian craton] (Muller et al., 2005; Bekker et al., 2016)	2031	2031			—
C Union Island-McKee [Slave craton] (Sheen et al., 2019)	2045–2035	2040	2045	2035	—
C Kangamuit-MD3 [North Atlantic craton]	2050–2030	2040	2050	2030	0.09	90000
C Bushveld [Kaapvaal craton]	2060	2060			0.39	390000
C Keivitsa–Kuetsjärvi-Umba [Karelia-Kola craton]	2060	2060			—
C Yixingzhai [North China craton] (Peng, 2015)	2060	2060			0.01	10000
C Lac Esprit [Superior craton]	2070	2070			0.07	70000
C Voronezh [Sarmatia]	2070	2070			0.2	200000
C Fort Frances [Superior craton]	2075	2075			0.17	170000
C Palomaa [Karelian craton] (Davey, 2019; Davey et al., 2020)	2070	2070			—
C Devarabanda [Dharwar craton] (Söderlund et al., 2019)	2080	2080			0.07	70000
C Cauchon [Superior craton]	2090 & 2070	2080	2090	2070	0.02	20000
C Zanhuang-Menglianggu [North China craton] (Peng, 2015; Yang et al., 2019)	2090	2090			—
C Snowy Pass [Wyoming craton]	2100–2080	2090	2100	2080	0.01	10000
Oa Narracoota [West Australian craton] (Pirajno & Hoatson, 2012)	ca. 2100	2100	2150	2050	—
C Griffin-Kazan-Chipman [Hearne & Rae cratons] (Regan et al., 2017; Buchan & Ernst, 2020)	2116–2111	2113.5	2116	2111	0.14	140000
C Bear Mountain [Wyoming craton]	2115	2115			0.02	20000
C Tommajarvi-Pirtguba [Karelian craton] (Davey, 2019; Davey et al., 2020)	2115	2115			0.11	110000
C Haicheng-Xiliu [North China craton] (Wang et al., 2016; Yang et al., 2019)	2115–2100	2107.5	2115	2100	—
C Marathon [Superior craton]	2120–2100	2110	2120	2100	0.16	160000
C Indin [Slave craton]	2126–2108	2117	2126	2108	0.04	40000
C Tikkigatsiagak-Avakutak [North Atlantic craton] (Sahin & Hamilton, 2019)	2140–2110	2125	2140	2110	0.01	10000
C Hengling [North China craton] (Peng, 2015)	2150	2150			—
C Rantavaara [Karelia-Kola craton] (Davey, 2019)	2150	2150			0.04	40000
C Riviere du Gue [Superior craton]	2150	2150			0.07	70000
C Biscotasing-Payne River [Superior craton] (Hamilton et al., 2017)	2172–2167	2169.5	2172	2167	0.45	450000
C Wind River & Rabbit Creek – Powder River (Wyoming craton) (Kilian et al., 2016)	2170 & 2155	2162.5	2155	2170	—
C Mahbubngour-Dandeli [Dharwar craton] (Söderlund et al., 2019)	2180	2180			0.29	290000
C SW Slave Magmaatic Province (Dogrib) [Slave craton]	2193–2180	2186.5	2193	2180	0.04	40000
C Tulemalu-MacQuoid [Rae craton]	2190	2190			0.04	40000
Oa Man-Leo (Lompo, 2010; Doucet et al., 2020)	2250–2000	2125	2250	2000	—
if ca, use +- 50 Ma as error

## Sheet: IF wo dep. rate
	SORTED MINIMUM AGE											SORTED MAXIMUM AGE											Average AGE
	Name/group	Formation	Age	uncertainty	Min age	max age	gtons (1 kg =0.001 tons)	Estimated IF (Gtons) from Bekker et al	cummulative size Bekker	MINIMUM Cumulative size new		Name/group	Formation	Age	uncertainty	Min age	max age	gtons (1 kg =0.001 tons)	Estimated IF (Gtons) from Bekker et al	cummulative size Bekker	MAXIMUM AGE Cumulative size new		Name/group	Formation	Age	uncertainty	Min age	max age	gtons (1 kg =0.001 tons)	Estimated IF (Gtons) from Bekker et al	cummulative size Bekker	MAXIMUM AGE Cumulative size new
	India	Alwar Fm	1850	15	1835	1865	0.5	0.5	946583	945162		India	Alwar Fm	1850	15	1835	1865	0.5	0.5	946583	945162		India	Alwar Fm	1850	15	1835	1865	0.5	0.5	946583	945162
	South Dakota	Rochford Fm	1884	29	1855	1913	103.144	0.5	946582	945162		took all AREA +max. thickness	Sokomon Iron Formation	1877.8	1.3	1876.5	1879.1	61373.7	100000	946582	945162		Lake Superior Region	Gunflint Iron Formation	1877.52	8.74	1868.78	1886.26	1255.64	10000	946582	945162
	Northwest Territories, Canada	Gibraltar Formation	1880	25	1855	1905	0.5	0.5	946582	945058		Lake Superior Region	Gunflint Iron Formation	1877.52	8.74	1868.78	1886.26	1255.64	10000	846582	883788			Biwabik Iron Formation	1877.52	8.74	1868.78	1897	11000.8		936582	943906
	Lake Superior Region	Gunflint Iron Formation	1877.52	8.74	1868.78	1886.26	1255.64	10000	946582	945058			Ironwood Iron Formation	1887	2	1883	1897	1119.64		836582	882532		took all AREA +max. thickness	Sokomon Iron Formation	1877.8	1.3	1876.5	1879.1	61373.7	100000	936582	932905
		Biwabik Iron Formation	1877.52	8.74	1868.78	1886.26	11000.8		936582	943802			Biwabik Iron Formation	1877.52	8.74	1868.78	1897	11000.8		836582	881413		Belcher Islands	Kipalu Formation	1880	7	1873	1899	895.49		836582	871532
	Belcher Islands	Kipalu Formation	1880	7	1873	1887	895.49		936582	932802		Belcher Islands	Kipalu Formation	1880	7	1873	1899	895.49		836582	870412		Northwest Territories, Canada	Gibraltar Formation	1880	25	1855	1907	0.5	0.5	836582	870636
	took all AREA +max. thickness	Sokomon Iron Formation	1877.8	1.3	1876.5	1879.1	61373.7	100000	936582	931906			Negaunee/Riverton Iron Formation	1891	3	1888	1901	26737.4		836582	869516		South Dakota	Rochford Fm	1884	29	1855	1913	103.144	0.5	836582	870636
	Northwest Territories, Canada	Basile Formation	1930	50	1880	1980	0.5	0.5	836582	870532		Australia	Frere Fm	1890	8	1882	1906	16093.8	10000	836582	842779			Ironwood Iron Formation	1887	2	1883	1897	1119.64		836582	870532
	Australia	Frere Fm	1890	8	1882	1898	16093.8	10000	836581	870532		Northwest Territories, Canada	Gibraltar Formation	1880	25	1855	1907	0.5	0.5	826582	826685		Australia	Frere Fm	1890	8	1882	1906	16093.8	10000	836582	869413
		Ironwood Iron Formation	1885	2	1883	1887	1119.64		826581	854438		South Dakota	Rochford Fm	1884	29	1855	1913	103.144	0.5	826582	826685			Negaunee/Riverton Iron Formation	1891	3	1888	1901	26737.4		826582	853319
		Negaunee/Riverton Iron Formation	1891	3	1888	1894	26737.4		826581	853318		Northwest Territories, Canada	Basile Formation	1930	50	1880	1980	0.5	0.5	826582	826582		Northwest Territories, Canada	Basile Formation	1930	50	1880	1980	0.5	0.5	826582	826582
	Liaoning Province, China	Liaohe Group	2000	50	1950	2050	100	100	826581	826581		Liaoning Province, China	Liaohe Group	2000	50	1950	2050	100	100	826581	826581		Liaoning Province, China	Liaohe Group	2000	50	1950	2050	100	100	826581	826581
	Bahia State, Brazil	Caldeira˜o belt	2078	100	1978	2178	0.5	0.5	826481	826481		South Dakota, USA	Estes Formation	2060	40	2020	2100	0.5	0.5	826481	826481		South Dakota, USA	Estes Formation	2060	40	2020	2100	0.5	0.5	826481	826481
	South Dakota, USA	Estes Formation	2060	40	2020	2100	0.5	0.5	826480	826480		Central Finland	Pa¨a¨kko Iron Formation	2080	45	2035	2125	0.5	0.5	826480	826480		Bahia State, Brazil	Caldeira˜o belt	2078	100	1978	2178	0.5	0.5	826480	826480
	Central Finland	Pa¨a¨kko Iron Formation	2080	45	2035	2125	0.5	0.5	826480	826480		Northern and southern parts of West-Nigeria	Malumfashi, Maru, Birnin Gwari, Kushaka, Muro, Egbe-Isanlu, and Obajana schist belts	2100	50	2050	2150	0.5	0.5	826480	826480		Central Finland	Pa¨a¨kko Iron Formation	2080	45	2035	2125	0.5	0.5	826480	826480
	Minnesota, USA	Glen Township Formation	2100	50	2050	2150	100	100	826480	826480		Minnesota, USA	Glen Township Formation	2100	50	2050	2150	100	100	826480	826480		Minnesota, USA	Glen Township Formation	2100	50	2050	2150	100	100	826480	826480
	Northern and southern parts of West-Nigeria	Malumfashi, Maru, Birnin Gwari, Kushaka, Muro, Egbe-Isanlu, and Obajana schist belts	2100	50	2050	2150	0.5	0.5	826380	826380		Bahia State, Brazil	Caldeira˜o belt	2078	100	1978	2178	0.5	0.5	826380	826380		Northern and southern parts of West-Nigeria	Malumfashi, Maru, Birnin Gwari, Kushaka, Muro, Egbe-Isanlu, and Obajana schist belts	2100	50	2050	2150	0.5	0.5	826380	826380
	Northern Zimbabwe	Lomagundi Group	2150	50	2100	2200	0.5	0.5	826379	826379		Northern Zimbabwe	Lomagundi Group	2150	50	2100	2200	0.5	0.5	826379	826379		Northern Zimbabwe	Lomagundi Group	2150	50	2100	2200	0.5	0.5	826379	826379
	Northern Cape Province, South Africa	Hotazel Iron Formation	2200	50	2150	2250	150	150	826378	826378		Western Mauritania	Ijil Group	2200	50	2150	2250	100	100	826378	826378		Northern Cape Province, South Africa	Hotazel Iron Formation	2200	50	2150	2250	150	150	826378	826378
	Western Mauritania	Ijil Group	2200	50	2150	2250	100	100	826228	826228		Northern Cape Province, South Africa	Hotazel Iron Formation	2200	50	2150	2250	150	150	826278	826278		Western Mauritania	Ijil Group	2200	50	2150	2250	100	100	826228	826228
	Gauteng and North West Provinces, South Africa	Timeball Hill Formation	2320	50	2270	2370	10	10	826128	826128		Gauteng and North West Provinces, South Africa	Timeball Hill Formation	2320	50	2270	2370	10000	10000	826128	826128		Gauteng and North West Provinces, South Africa	Timeball Hill Formation	2320	50	2270	2370	10000	10000	826128	826128
	Liberia, West Africa	Nimba Itabirite	2400.6	50	2350.6	2450.6	10000	10000	826118	826118		Western Australia, Australia	Boolgeeda Iron Formation	2445	5	2440	2450	19000	19000	816128	816128		Liberia, West Africa	Nimba Itabirite	2400.6	50	2350.6	2450.6	10	10	816128	816128
	Western Australia, Australia	Hamersley Basin	2445	50	2395	2495	100000	100000	816118	816118		Liberia, West Africa	Nimba Itabirite	2400.6	50	2350.6	2450.6	10	10	797128	797128		Northern Cape Province, South Africa	Griquatown Iron Formation	2431	31	2400	2462	0.5	0.5	816118	816118
	Northern Cape Province, South Africa	Griquatown Iron Formation	2431	31	2400	2462	0.5	0.5	716118	716118		Western Australia, Australia	Weeli Wolli Formation	2449	3	2446	2452	19000	19000	797118	797118		Western Australia, Australia	Boolgeeda Iron Formation	2445	5	2440	2450	19000	19000	816118	816118
	Western Russia	Kursk Supergroup	2450	50	2400	2500	300000	300000	716118	716118		Northern Cape Province, South Africa	Griquatown Iron Formation	2431	31	2400	2462	0.5	0.5	778118	778118		Western Australia, Australia	Hamersley Basin	2445	50	2395	2495	100000	100000	797118	797118
	Northern Cape Province, South Africa	Transvaal Province	2450	50	2400	2500	100000	100000	416118	416118		Western Australia, Australia	Brockman Iron Formation (Joffre Mbr)	2461	6	2455	2467	30000	30000	778118	778118		Western Australia, Australia	Weeli Wolli Formation	2449	3	2446	2452	19000	19000	697118	697118
	Minas Gerais State, Brazil	Caueˆ Formation	2450	50	2400	2500	100000	100000	316118	316118		Northern Cape Province, South Africa	Kuruman Iron Formation	2465	7	2458	2472	0.5	0.5	748118	748118		Eastern Ukraine	Krivoy Rog Supergroup	2450	50	2400	2500	50000	50000	678118	678118
	Eastern Ukraine	Krivoy Rog Supergroup	2450	50	2400	2500	50000	50000	216118	216118		Prince Charles Mountains, East Antarctica	Ruker Series	2465	15	2450	2480	0.5	0.5	748118	748118		Minas Gerais State, Brazil	Caueˆ Formation	2450	50	2400	2500	100000	100000	628118	628118
	Western Australia, Australia	Boolgeeda Iron Formation	2445	5	2440	2450	19000	19000	166118	166118		North West Province, South Africa	Penge Iron Formation	2480	6	2474	2486	0.5	0.5	748117	748117		Northern Cape Province, South Africa	Transvaal Province	2450	50	2400	2500	100000	100000	528118	528118
	Western Australia, Australia	Weeli Wolli Formation	2449	3	2446	2452	19000	19000	147118	147118		Western Australia, Australia	Hamersley Basin	2445	50	2395	2495	100000	100000	748116	748116		Western Russia	Kursk Supergroup	2450	50	2400	2500	300000	300000	428118	428118
	Prince Charles Mountains, East Antarctica	Ruker Series	2465	15	2450	2480	0.5	0.5	128118	128118		Eastern Ukraine	Krivoy Rog Supergroup	2450	50	2400	2500	50000	50000	648116	648116		Western Australia, Australia	Brockman Iron Formation (Joffre Mbr)	2461	6	2455	2467	30000	30000	128118	128118
	Cleve domain, South Australia,	Hutchison Group (Middleback Ranges)	2500	50	2450	2550	1000	1000	128118	128118		Minas Gerais State, Brazil	Caueˆ Formation	2450	50	2400	2500	100000	100000	598116	598116		Northern Cape Province, South Africa	Kuruman Iron Formation	2465	7	2458	2472	0.5	0.5	98118	98118
	Western Australia, Australia	Brockman Iron Formation (Joffre Mbr)	2461	6	2455	2467	30000	30000	127118	127118		Northern Cape Province, South Africa	Transvaal Province	2450	50	2400	2500	100000	100000	498116	498116		Prince Charles Mountains, East Antarctica	Ruker Series	2465	15	2450	2480	0.5	0.5	98117.5	98117.5
	Western Australia, Australia	Mt. Sylvia Formation	2505	50	2455	2555	3000	3000	97117.5	97117.5		Western Russia	Kursk Supergroup	2450	50	2400	2500	300000	300000	398116	398116		North West Province, South Africa	Penge Iron Formation	2480	6	2474	2486	0.5	0.5	98117	98117
	Northern Cape Province, South Africa	Kuruman Iron Formation	2465	7	2458	2472	0.5	0.5	94117.5	94117.5		Western Australia, Australia	Brockman Iron Formation (Dales Gorge Mbr)	2495	16	2479	2511	13000	13000	98116.5	98116.5		Western Australia, Australia	Brockman Iron Formation (Dales Gorge Mbr)	2495	16	2479	2511	13000	13000	98116.5	98116.5
	Montana, USA	Indian Creek Metamorphic Suite	2610	140	2470	2750	1	1	94117	94117		Cleve domain, South Australia,	Hutchison Group (Middleback Ranges)	2500	50	2450	2550	1000	1000	85116.5	85116.5		Cleve domain, South Australia,	Hutchison Group (Middleback Ranges)	2500	50	2450	2550	1000	1000	85116.5	85116.5
	North West Province, South Africa	Penge Iron Formation	2480	6	2474	2486	0.5	0.5	94116	94116		Western Australia, Australia	Mt. Sylvia Formation	2505	50	2455	2555	3000	3000	84116.5	84116.5		Western Australia, Australia	Mt. Sylvia Formation	2505	50	2455	2555	3000	3000	84116.5	84116.5
	Western Australia, Australia	Brockman Iron Formation (Dales Gorge Mbr)	2495	16	2479	2511	13000	13000	94115.5	94115.5		South Dakota, USA	Benchmark Iron Formation	2520	40	2480	2560	0.5	0.5	81116.5	81116.5		South Dakota, USA	Benchmark Iron Formation	2520	40	2480	2560	0.5	0.5	81116.5	81116.5
	South Dakota, USA	Benchmark Iron Formation	2520	40	2480	2560	0.5	0.5	81115.5	81115.5		Western Australia, Australia	Marra Mamba Iron Formation	2597	5	2592	2602	17000	17000	81116	81116		Western Australia, Australia	Marra Mamba Iron Formation	2597	5	2592	2602	17000	17000	81116	81116
	South Dakota, USA	Nemo Iron Formation	2735	165	2570	2900	0.5	0.5	81115	81115		Karnataka Province, southern India	Chitradurga Group	2614	8	2606	2622	1000	1000	64116	64116		Montana, USA	Indian Creek Metamorphic Suite	2610	140	2470	2750	1	1	64116	64116
	Western Australia, Australia	Marra Mamba Iron Formation	2597	5	2592	2602	17000	17000	81114.5	81114.5		Karnataka Province, southern India	Bababudan Group	2700	7	2693	2707	1000	1000	63116	63116		Karnataka Province, southern India	Chitradurga Group	2614	8	2606	2622	1000	1000	64115	64115
	Australia	Yilgarn Block greenstone	2800	200	2600	3000	1000	1000	64114.5	64114.5		Para´ State, Brazil	Caraja´s Formation	2745	5	2740	2750	50000	50000	62116	62116		Karnataka Province, southern India	Bababudan Group	2700	7	2693	2707	1000	1000	63115	63115
	Karnataka Province, southern India	Chitradurga Group	2614	8	2606	2622	1000	1000	63114.5	63114.5		Ontario	Michipipteten	2725	25	2700	2750	1000	1000	12116	12116		Liaoning Province, China	Anshan Iron Formation	2700	50	2650	2750	10000	10000	62115	62115
	Liaoning Province, China	Anshan Iron Formation	2700	50	2650	2750	10000	10000	62114.5	62114.5		Ontario, Canada	Beardmore-Geraldton assemblage	2700	50	2650	2750	0.5	0.5	11116	11116		Ontario, Canada	Beardmore-Geraldton assemblage	2700	50	2650	2750	0.5	0.5	52115	52115
	Ontario, Canada	Beardmore-Geraldton assemblage	2700	50	2650	2750	0.5	0.5	52114.5	52114.5		Liaoning Province, China	Anshan Iron Formation	2700	50	2650	2750	10000	10000	11115.5	11115.5		Ontario	Michipipteten	2725	25	2700	2750	1000	1000	52114.5	52114.5
	Karnataka Province, southern India	Bababudan Group	2700	7	2693	2707	1000	1000	52114	52114		Montana, USA	Indian Creek Metamorphic Suite	2610	140	2470	2750	1	1	1115.5	1115.5		South Dakota, USA	Nemo Iron Formation	2735	165	2570	2900	0.5	0.5	51114.5	51114.5
	Southern Zimbabwe	Manjeri Iron Formation	2765	65	2700	2830	0.5	0.5	51114	51114		Southern Zimbabwe	Manjeri Iron Formation	2765	65	2700	2830	0.5	0.5	1114.5	1114.5		Para´ State, Brazil	Caraja´s Formation	2745	5	2740	2750	50000	50000	51114	51114
	Montana	Beertooth Mtns	2920	220	2700	3140	1	1	51113.5	51113.5		South Dakota, USA	Nemo Iron Formation	2735	165	2570	2900	0.5	0.5	1114	1114		Southern Zimbabwe	Manjeri Iron Formation	2765	65	2700	2830	0.5	0.5	1114	1114
	Ontario	Michipipteten	2725	25	2700	2750	1000	1000	51112.5	51112.5		Nunavut, Canada	Central Slave Cover Group	2825	95	2730	2920	0.5	0.5	1113.5	1113.5		Australia	Yilgarn Block greenstone	2800	200	2600	3000	1000	1000	1113.5	1113.5
	Nunavut, Canada	Central Slave Cover Group	2825	95	2730	2920	0.5	0.5	50112.5	50112.5		Australia	Yilgarn Block greenstone	2800	200	2600	3000	1000	1000	1113	1113		Nunavut, Canada	Central Slave Cover Group	2825	95	2730	2920	0.5	0.5	113.5	113.5
	Para´ State, Brazil	Caraja´s Formation	2745	5	2740	2750	50000	50000	50112	50112		Gauteng Province, South Africa	West Rand Group	2960	50	2910	3010	10	10	113	113		Montana	Beertooth Mtns	2920	220	2700	3140	1	1	113	113
	KwaZulu-Natal Province, South Africa	Pongola Supergroup	2960	50	2910	3010	100	100	112	112		KwaZulu-Natal Province, South Africa	Pongola Supergroup	2960	50	2910	3010	100	100	103	103		Gauteng Province, South Africa	West Rand Group	2960	50	2910	3010	10	10	112	112
	Gauteng Province, South Africa	West Rand Group	2960	50	2910	3010	10	10	12	12		Western Australia, Australia	Jack Hills belt	3080	20	3060	3100	0.5	0.5	3	3		KwaZulu-Natal Province, South Africa	Pongola Supergroup	2960	50	2910	3010	100	100	102	102
	Western Australia, Australia	Jack Hills belt	3080	20	3060	3100	0.5	0.5	2	2		Montana	Beertooth Mtns	2920	220	2700	3140	1	1	2.5	2.5		Western Australia, Australia	Jack Hills belt	3080	20	3060	3100	0.5	0.5	2	2
	Barberton, South Africa	Moodies Group	3230	50	3180	3280	0.5	0.5	1.5	1.5		Barberton, South Africa	Moodies Group	3230	50	3180	3280	0.5	0.5	1.5	1.5		Barberton, South Africa	Moodies Group	3230	50	3180	3280	0.5	0.5	1.5	1.5
	Greenland	Isua	3760	70	3690	3830	1	1	1	1		Greenland	Isua	3760	70	3690	3830	1	1	1	1		Greenland	Isua	3760	70	3690	3830	1	1	1	1
MINIMUM
																																AREA
Region	Group	Formation	Thickness (m)	Area (m^2)	Age	uncertainty	Min age	max age	stratigraphic height of age	MIN AGE	Summative	Summative thickness		Region	Group	Formation	Thickness (m)	Area (m^2)	Age	uncertainty	Min age	max age	stratigraphic height of age	MAX AGE	Summative AREA	Summative thickness
Northwest Territories, Canada	Kahochella Gp	Gibraltar Formation	10	7.97255e+08			1804	1895	min-max	1804	2.7598e+11	5160.4		Belcher Islands		Kipalu Formation	130	2.29613e+09			1870	--	min	1870	2.7598e+11	5160.4
Minnesota, USA	Mille Lacs Group	Glen Township Formation/Randall Fm-same as biwabik area?	20	1.60408e+10			1832	2236	min-max	1832	2.75183e+11	5150.4		Lake Superior Region Cuyna Range	North Range and South Range Group/Emily district	Trommald Formation, Rabbit Lake, Mahnomen, Cuyuna-area same as animikie	183	1.60408e+10			1870	--	min	1870	2.73684e+11	5030.4
South Dakota		Rochford Fm	20	1.71907e+09			1855	1913	min-max	1855	2.59142e+11	5130.4		Lake Superior Region-Menominee/Iron river		Riverton/Vulcan iron formatino -same area as Negaunee?	228	8.3544e+09			1874	--	min	1874	2.57643e+11	4847.4
Lake Superior Region-Amasa		Amasa fm/Fence River (30 m overly hemlock), Mansfield member -interbedded/below volcanics (152m), Bird member 61 m.	243	8.94141e+07	1874	18	1856	1892	213	1856	2.57423e+11	5110.4		Labrador Trough took all AREA +max. thickness		Sokomon Iron Formation	375	5.45544e+10			1878.5	--	min	1878.5	2.49289e+11	4619.4
Lake Superior Region		Gunflint Iron Formation	190	2.20287e+09	1877.52	8.74	1868.78	1886.26	60	1868.78	2.57334e+11	4867.4		Lake Superior Region		Gunflint Iron Formation	190	2.20287e+09	1877.52	8.74	1868.78	1886.26	60	1886.26	1.94735e+11	4244.4
Lake Superior Region		Biwabik Iron Formation	228.6	1.60408e+10	1877.52	8.74	1868.78	1886.26	121	1868.78	2.55131e+11	4677.4		Lake Superior Region		Biwabik Iron Formation	228.6	1.60408e+10	1877.52	8.74	1868.78	1886.26	121	1886.26	1.92532e+11	4054.4
Belcher Islands		Kipalu Formation	130	2.29613e+09			1870	--	min	1870	2.3909e+11	4448.8		Lake Superior Region		Ironwood Iron Formation	800	3.80829e+08	1885	4	1881	1889	600	1889	1.76491e+11	3825.8
Australia-option 1		Frere Fm	250	2.14584e+10	1890	20	1870	1910	12	1870	2.36794e+11	4318.8		Lake Superior Region		Negaunee/Riverton Iron Formation	1066.8	8.3544e+09			1891	--	min	1891	1.7611e+11	3025.8
Lake Superior Region Cuyna Range	North Range and South Range Group/Emily district	Trommald Formation, Rabbit Lake, Mahnomen, Cuyuna-area same as animikie	183	1.60408e+10			1870	--	min	1870	2.15336e+11	4068.8		Lake Superior Region-Amasa		Amasa fm/Fence River (30 m overly hemlock), Mansfield member -interbedded/below volcanics (152m), Bird member 61 m.	243	8.94141e+07	1874	18	1856	1892	213	1892	1.67756e+11	1959
Lake Superior Region-Menominee/Iron river		Riverton/Vulcan iron formatino -same area as Negaunee?	228	8.3544e+09			1874	--	min	1874	1.99295e+11	3885.8		Northwest Territories, Canada	Kahochella Gp	Gibraltar Formation	10	7.97255e+08			1804	1895	min-max	1895	1.67666e+11	1716
Labrador Trough took all AREA +max. thickness		Sokomon Iron Formation	375	5.45544e+10			1878.5	--	min	1878.5	1.9094e+11	3657.8		Australia-option 1		Frere Fm	250	2.14584e+10	1890	20	1870	1910	12	1910	1.66869e+11	1706
Lake Superior Region		Ironwood Iron Formation	800	3.80829e+08	1885	4	1881	1889	600	1881	1.36386e+11	3282.8		South Dakota		Rochford Fm	20	1.71907e+09			1855	1913	min-max	1913	1.45411e+11	1456
Lake Superior Region		Negaunee/Riverton Iron Formation	1066.8	8.3544e+09			1891	--	min	1891	1.36005e+11	2482.8		Northwest Territories, Canada	wilson island group	Basile Formation	100	240000			1895	1928	min-max	1928	1.43692e+11	1436
Northwest Territories, Canada	wilson island group	Basile Formation	100	240000			1895	1928	min-max	1895	1.27651e+11	1416		South Dakota, USA		Estes Formation, Homestake Iron Formation	100	1.71907e+09			1974	2100	min-max	2100	1.43691e+11	1336
South Dakota, USA		Estes Formation, Homestake Iron Formation	100	1.71907e+09			1974	2100	min-max	1974	1.27651e+11	1316		Central Finland		Paakko Iron Formation	36	262500	2080	45	2035	2125	min-max	2125	1.41972e+11	1236
Western Mauritania	Ijil Group	Ijil Iron Formation	100	170000000			2000	2200	min-max	2000	125931503788	1216		Bahia State, Brazil		Caldeirao belt	20	1050000000			2080	2170	min-max	2170	1.41972e+11	1200
Northern and southern parts of West-Nigeria		Malumfashi, Maru, Birnin Gwari, Kushaka, Muro, Egbe-Isanlu, and Obajana schist belts	60	40000000			2000	2300	min-max	2000	125761503788	1116		Western Mauritania	Ijil Group	Ijil Iron Formation	100	170000000			2000	2200	min-max	2200	1.40922e+11	1180
Central Finland		Paakko Iron Formation	36	262500	2080	45	2035	2125	min-max	2035	125721503788	1056		Northern Zimbabwe	Lomagundi Group	Mcheka Formation-Sandy Argillite Member (uppermost)	50	7500000			2100	2216	min-max	2216	1.40752e+11	1080
Bahia State, Brazil		Caldeirao belt	20	1050000000			2080	2170	min-max	2080	125721241288	1020		Minnesota, USA	Mille Lacs Group	Glen Township Formation/Randall Fm-same as biwabik area?	20	1.60408e+10			1832	2236	min-max	2236	1.40745e+11	1030
Northern Zimbabwe	Lomagundi Group	Mcheka Formation-Sandy Argillite Member (uppermost)	50	7500000			2100	2216	min-max	2100	124671241288	1000		Northern and southern parts of West-Nigeria		Malumfashi, Maru, Birnin Gwari, Kushaka, Muro, Egbe-Isanlu, and Obajana schist belts	60	40000000			2000	2300	min-max	2300	124703741288	1010
Liaoning Province, China	Lüliang Group (Replacing "Liaoning Province, China Liaohe Group" of bekker)	Yuanjiacun Formation-	400	118900000			2100	2380	min-max	2100	124663741288	950		Gauteng and North West Provinces, South Africa	Pretoria Group	Timeball Hill Formation	40	62159920644			2266	2310	min-max	2310	124663741288	950
Liberia, West Africa		Nimba Itabirite	450	225000000			2200	2615	min-max	2200	124544841288	550		Liaoning Province, China	Lüliang Group (Replacing "Liaoning Province, China Liaohe Group" of bekker)	Yuanjiacun Formation-	400	118900000			2100	2380	min-max	2380	62503820644	910
Gauteng and North West Provinces, South Africa	Pretoria Group	Timeball Hill Formation	40	62159920644			2266	2310	min-max	2266	124319841288	100		Northern Cape Province, South Africa		Hotazel Iron Formation-area of tranvaal	60	62159920644			2393	2426	min-max	2426	62384920644	510
Northern Cape Province, South Africa		Hotazel Iron Formation-area of tranvaal	60	62159920644			2393	2426	min-max	2393	62159920644	60		Liberia, West Africa		Nimba Itabirite	450	225000000			2200	2615	min-max	2615	225000000	450
																													THICKNESS

## Sheet:  accretionary lengths
Median Felsic age	length	Cumulative length		Onset age	length	Cumulative length
				1800	2100	19890
1850	3200	19890		1830	3200	17790
1850	1000	16690		1869	700	14590
1862	860	15690		1870	900	13890
1867	1000	14830		1875	860	12990
1885	1800	13830		1880	1000	12130
1900	700	12030		1880	1000	11130
1920	900	11330		1890	1450	10130
1960	950	10430		1900	1500	8680
1998	2100	9480		1900	1800	7180
1998	1930	7380		1920	950	5380
2100	1450	5450		2040	1930	4430
2100	2500	4000		2150	2500	2500
2101	1500	1500

## Sheet: collisional lengths
Median Felsic age	length	Cumulative length		Onset age	length	Cumulative length
1824	800	12450		1840	800	12450
1850	1500	11650		1850	950	11650
1858	950	10150		1890	1500	10700
1860	2200	9200		1900	1300	9200
1900	1300	7000		1900	2200	7900
1968	2000	5700		1965	1000	5700
1989	1000	3700		1985	2000	4700
2100	2700	2700		2100	2700	2700

## Sheet:  Blk Shales w.o dep rate
250 K.C. Condie et al./Precambrian Research106 (2001) 239–260
Geologic unit	Reference	Age (Ma)	uncetainty	Thickness Total (m)	Black Shale (m)	Shale (Black/Total)	Shale (%)	Carbonate (m)	Cumulative													Geologic unit	Reference	Age (Ma)	uncetainty	Min age	Thickness Total (m)	Black Shale (m)	Shale (Black/Total)	Shale (%)	Cumulative			Geologic unit	Reference	Age (Ma)	uncetainty	max age	Thickness Total (m)	Black Shale (m)	Shale (Black/Total)	Shale (%)	Cumulative
Neoproterozoic, Central Spain, Mid and Upper series	Ugidos et al. 1997	600	20	1500	813	0.76	71	210	24676													Pocatello Forma-tion and Brigham Group, Idaho	Paul Link, 1998	600	100	500	4500	675	0.5	30	24571			Neoproterozoic, Central Spain, Mid and Upper series	Ugidos et al. 1997	600	20	620	1500	813	0.76	71	24571
Malokaroi Group N Tien Shan	Andrei Khudo-ley, 1998	600	50	1200	126	0.35	30	0	23863													Malokaroi Group N Tien Shan	Andrei Khudo-ley, 1998	600	50	550	1200	126	0.35	30	23896			Malokaroi Group N Tien Shan	Andrei Khudo-ley, 1998	600	50	650	1200	126	0.35	30	23758
Pocatello Forma-tion and Brigham Group, Idaho	Paul Link, 1998	600	100	4500	675	0.5	30	320	23737													Neoproterozoic, Central Spain, Mid and Upper series	Ugidos et al. 1997	600	20	580	1500	813	0.76	71	23770			Tungusic Group Yenisey Ridge, Siberia	V. A. Vernikovsky, 1998	650	35	685	5500	165	0.1	30	23632
Tungusic Group Yenisey Ridge, Siberia	V. A. Vernikovsky, 1998	650	35	5500	165	0.1	30	0	23062													Andree Land Group East Greenland	Kasper Fred-eriksen, 1997	650	45	605	1250	51	0.27	15	22957			Zhdanov Group Taimyr, Siberia	V. A. Vernikovsky, 1998	650	40	690	1000	120	0.3	40	23467
Zhdanov Group Taimyr, Siberia	V. A. Vernikovsky, 1998	650	40	1000	120	0.3	40	0	22897													Zhdanov Group Taimyr, Siberia	V. A. Vernikovsky, 1998	650	40	610	1000	120	0.3	40	22906			Kharitonov Group V. A. Taimyr, Siberia	V. A. Vernikovsky, 1998	650	40	690	2500	165	0.33	20	23347
Kharitonov Group V. A. Taimyr, Siberia	V. A. Vernikovsky, 1998	650	40	2500	165	0.33	20	0	22777													Kharitonov Group V. A. Taimyr, Siberia	V. A. Vernikovsky, 1998	650	40	610	2500	165	0.33	20	22786			Andree Land Group East Greenland	Kasper Fred-eriksen, 1997	650	45	695	1250	51	0.27	15	23182
Andree Land Group East Greenland	Kasper Fred-eriksen, 1997	650	45	1250	51	0.27	15	0	22612													Tungusic Group Yenisey Ridge, Siberia	V. A. Vernikovsky, 1998	650	35	615	5500	165	0.1	30	22621			Pocatello Forma-tion and Brigham Group, Idaho	Paul Link, 1998	600	100	700	4500	675	0.5	30	23131
Chuar Group, Arizona	Carol Dehler, 1998	750	50	2000	480	0.3	80	329	22561													Chuar Group, Arizona	Carol Dehler, 1998	750	50	700	2000	480	0.3	80	22456			Chuar Group, Arizona	Carol Dehler, 1998	750	50	800	2000	480	0.3	80	22456
Bleida-Tachdamt, Morocco	Leblan and Moussine-Pouchkine, 1994	790	50	2500	500	0.8	25	150	22081													Changcheng Series, Jixian, Hebei, China	Gao Shan, 1998	850	120	730	4270	519	0.76	16	21976			Bleida-Tachdamt, Morocco	Leblan and Moussine-Pouchkine, 1994	790	50	840	2500	500	0.8	25	21976
Changcheng Series, Jixian, Hebei, China	Gao Shan, 1998	850	120	4270	519	0.76	16	0	21581													Bleida-Tachdamt, Morocco	Leblan and Moussine-Pouchkine, 1994	790	50	740	2500	500	0.8	25	21457			Qingbaikou Series, Huailei, Hebei, China	Gao Shan, 1998	850	110	960	760	161	0.34	62	21476
Qingbaikou Series, Huailei, Hebei, China	Gao Shan, 1998	850	110	760	161	0.34	62	0	21062													Qingbaikou Series, Huailei, Hebei, China	Gao Shan, 1998	850	110	740	760	161	0.34	62	20957			Changcheng Series, Jixian, Hebei, China	Gao Shan, 1998	850	120	970	4270	519	0.76	16	21315
Upper Vindhyan Supergp Central India	Bose et al. (1997) Rajat Mazumber 1998 Kale and Phansalkar -1991	1000	50	3000	158	0.15	35	200	20901													Shaler Supergroup NW Territories, canada	Young (1981); Rainbird et al. 1996	1000	70	930	3600	554	0.55	28	20796			Roan/Mwashia Groups Zambia	Richard Han-son, 1998	1000		1000	1800	81	0.3	15	20796
Shaler Supergroup NW Territories, canada	Young (1981); Rainbird et al. 1996	1000	70	3600	554	0.55	28	1920	20743													Upper Vindhyan Supergp Central India	Bose et al. (1997) Rajat Mazumber 1998 Kale and Phansalkar -1991	1000	50	950	3000	158	0.15	35	20242			Upper Vindhyan Supergp Central India	Bose et al. (1997) Rajat Mazumber 1998 Kale and Phansalkar -1991	1000	50	1050	3000	158	0.15	35	20715
Roan/Mwashia Groups Zambia	Richard Han-son, 1998	1000		1800	81	0.3	15	450	20189													Roan/Mwashia Groups Zambia	Richard Han-son, 1998	1000		1000	1800	81	0.3	15	20084			Shaler Supergroup NW Territories, canada	Young (1981); Rainbird et al. 1996	1000	70	1070	3600	554	0.55	28	20557
Lower Vindhyan Supergp Central India	Bose et al. (1997) Rajat Mazumber 1998	1050	50	4000	260	0.26	25	430	20108													Lower Vindhyan Supergp Central India	Bose et al. (1997) Rajat Mazumber 1998	1050	50	1000	4000	260	0.26	25	20003			Lower Vindhyan Supergp Central India	Bose et al. (1997) Rajat Mazumber 1998	1050	50	1100	4000	260	0.26	25	20003
San Ignacio, Subgroup Bolivia	Litherland et. al. (1986)	1250	50	3000	396	0.33	40	30	19848													San Ignacio, Subgroup Bolivia	Litherland et. al. (1986)	1250	50	1200	3000	396	0.33	40	19743			San Ignacio, Subgroup Bolivia	Litherland et. al. (1986)	1250	50	1300	3000	396	0.33	40	19743
Belt Supergroup Montana	Winston (1990)	1450	10	7500	600	0.2	40	1390	19452													Belt Supergroup Montana	Winston (1990)	1450	10	1440	7500	600	0.2	40	19347			Belt Supergroup Montana	Winston (1990)	1450	10	1460	7500	600	0.2	40	19347
Roraima Group Guiana	Gibbs and Barron (1993)	1600	50	2000	75	0.25	15	0	18852													Roraima Group Guiana	Gibbs and Barron (1993)	1600	50	1550	2000	75	0.25	15	18747			Roraima Group Guiana	Gibbs and Barron (1993)	1600	50	1650	2000	75	0.25	15	18747
Roper Group Northern Australia	Donnelly and Crick (1988) Jackson andRaiswell (1991)	1640	50	3500	406	0.2	58	0	18777													Roper Group Northern Australia	Donnelly and Crick (1988) Jackson andRaiswell (1991)	1640	50	1590	3500	406	0.2	58	18672			Roper Group Northern Australia	Donnelly and Crick (1988) Jackson andRaiswell (1991)	1640	50	1690	3500	406	0.2	58	18672
Willyama Super-group Broken Hill,Australia	Willis et al.-1983	1690	10	4000	600	0.5	30	200	18371													Earaheedy Group, Western Australia	B. Krapez, 1998, Krapez and Martin (1999)	1700	22	1678	8000	1540	0.55	35	18266			Willyama Super-group Broken Hill,Australia	Willis et al.-1983	1690	10	1700	4000	600	0.5	30	18266
Bresnahan Group, Western Australia	B. Krapez, 1998; Krapez (1999)	1700	20	4000	1008	0.4	63	0	17771													Willyama Super-group Broken Hill,Australia	Willis et al.-1983	1690	10	1680	4000	600	0.5	30	16726			Bresnahan Group, Western Australia	B. Krapez, 1998; Krapez (1999)	1700	20	1720	4000	1008	0.4	63	17666
Earaheedy Group, Western Australia	B. Krapez, 1998, Krapez and Martin (1999)	1700	22	8000	1540	0.55	35	667	16763													Bresnahan Group, Western Australia	B. Krapez, 1998; Krapez (1999)	1700	20	1680	4000	1008	0.4	63	16126			Earaheedy Group, Western Australia	B. Krapez, 1998, Krapez and Martin (1999)	1700	22	1722	8000	1540	0.55	35	16658
Mt Blair-Mt, Minnie Gp, Western Australia	B. Krapez, 1998; Krapez (1999)	1750	30	1850	201	0.35	31	158	15223													Mt Blair-Mt, Minnie Gp, Western Australia	B. Krapez, 1998; Krapez (1999)	1750	30	1720	1850	201	0.35	31	15118			Mt Blair-Mt, Minnie Gp, Western Australia	B. Krapez, 1998; Krapez (1999)	1750	30	1780	1850	201	0.35	31	15118
Cane River-Pin-gandy Gp, Western Australia	B. Krapez, 1998; Krapez (1999)	1790	20	4000	500	0.5	25	0	15022													Cane River-Pin-gandy Gp, Western Australia	B. Krapez, 1998; Krapez (1999)	1790	20	1770	4000	500	0.5	25	14917			Cane River-Pin-gandy Gp, Western Australia	B. Krapez, 1998; Krapez (1999)	1790	20	1810	4000	500	0.5	25	14917
Whitewater Group, Ontario, Canada	Chris Fedo, 1998	1850	20	3000	540	0.9	20	0	14522													South Alligator Group Northern Australia	Stewart Need-ham, 1998	1900	100	1800	1250	250	0.4	50	14417			Whitewater Group, Ontario, Canada	Chris Fedo, 1998	1850	20	1870	3000	540	0.9	20	14417
Biscay Formation, Kimberley, Western Australia	David Blake, 1998	1875	5	1000	160	0.8	20	333	13982													Whitewater Group, Ontario, Canada	Chris Fedo, 1998	1850	20	1830	3000	540	0.9	20	14167			Biscay Formation, Kimberley, Western Australia	David Blake, 1998	1875	5	1880	1000	160	0.8	20	13877
Thomson Formation Minnesota	Dick Ojakan- gas, 1998	1878	20	7500	2025	1	27	250	13822													Ramah Group, Labrador	Hayashi et al.1997	1900	50	1850	1700	394	0.58	40	13627			Thomson Formation Minnesota	Dick Ojakan- gas, 1998	1878	20	1898	7500	2025	1	27	13717
Wandarry Group, Western Australia	B. Krapez, 1998	1880	20	3700	1079	0.54	54	625	11797													Thomson Formation Minnesota	Dick Ojakan- gas, 1998	1878	20	1858	7500	2025	1	27	13233			Wandarry Group, Western Australia	B. Krapez, 1998	1880	20	1900	3700	1079	0.54	54	11692
Robinson Range Group, Western Australia	B. Krapez, 1998, Krapez and Martin (1999)	1880	20	2500	248	0.31	32	0	10718													Wandarry Group, Western Australia	B. Krapez, 1998	1880	20	1860	3700	1079	0.54	54	11208			Robinson Range Group, Western Australia	B. Krapez, 1998, Krapez and Martin (1999)	1880	20	1900	2500	248	0.31	32	10613
Rove Formation Minnesota	Dick Ojakan- gas, 1998	1880	20	3200	800	0.5	50	250	10470													Robinson Range Group, Western Australia	B. Krapez, 1998, Krapez and Martin (1999)	1880	20	1860	2500	248	0.31	32	10129			Rove Formation Minnesota	Dick Ojakan- gas, 1998	1880	20	1900	3200	800	0.5	50	10365
Ramah Group, Labrador	Hayashi et al.1997	1900	50	1700	394	0.58	40	193	9670													Rove Formation Minnesota	Dick Ojakan- gas, 1998	1880	20	1860	3200	800	0.5	50	9881			Ramah Group, Labrador	Hayashi et al.1997	1900	50	1950	1700	394	0.58	40	9565
South Alligator Group Northern Australia	Stewart Need-ham, 1998	1900	100	1250	250	0.4	50	175	9276													Biscay Formation, Kimberley, Western Australia	David Blake, 1998	1875	5	1870	1000	160	0.8	20	9081			Mininer Group, Western Australia	B. Krapez, 1998	1925	25	1950	3700	306	0.46	18	9171
Mininer Group, Western Australia	B. Krapez, 1998	1925	25	3700	306	0.46	18	500	9026													Mininer Group, Western Australia	B. Krapez, 1998	1925	25	1900	3700	306	0.46	18	8921			Padbury Group, Western Australia	B. Krapez, 1998, Krapez and Martin (1999)	1930	20	1950	4200	544	0.54	24	8865
Padbury Group, Western Australia	B. Krapez, 1998, Krapez and Martin (1999)	1930	20	4200	544	0.54	24	0	8720													Padbury Group, Western Australia	B. Krapez, 1998, Krapez and Martin (1999)	1930	20	1910	4200	544	0.54	24	8615			Onega basin, Kolar-Karelia	A. Slabunov, 1998, Puchtel et al.. 1998	1975	10	1985	2740	600	0.73	30	8321
Horseshoe Group, Western Australia	B. Krapez,1998 Krapez and Martin (1999)	1975	20	1050	628	0.63	95	210	8176													Horseshoe Group, Western Australia	B. Krapez,1998 Krapez and Martin (1999)	1975	20	1955	1050	628	0.63	95	8071			Horseshoe Group, Western Australia	B. Krapez,1998 Krapez and Martin (1999)	1975	20	1995	1050	628	0.63	95	7721
Onega basin, Kolar-Karelia	A. Slabunov, 1998, Puchtel et al.. 1998	1975	10	2740	600	0.73	30	50	7548													Piriwiri Group Zimbabwe	Master (1991)	2000	40	1960	2100	158	0.3	25	7443			South Alligator Group Northern Australia	Stewart Need-ham, 1998	1900	100	2000	1250	250	0.4	50	7093
Neds Creek Group, Western Australia	B. Krapez,1998 Krapez and Martin (1999)	1995	25	5300	1993	0.8	47	0	6948													Onega basin, Kolar-Karelia	A. Slabunov, 1998, Puchtel et al.. 1998	1975	10	1965	2740	600	0.73	30	7285			Neds Creek Group, Western Australia	B. Krapez,1998 Krapez and Martin (1999)	1995	25	2020	5300	1993	0.8	47	6843
Wyloo Group, Western Australia	B. Krapez, 1998; Krapez (1999)	2000	30	4300	495	0.5	23	374	4955													Neds Creek Group, Western Australia	B. Krapez,1998 Krapez and Martin (1999)	1995	25	1970	5300	1993	0.8	47	6685			Wyloo Group, Western Australia	B. Krapez, 1998; Krapez (1999)	2000	30	2030	4300	495	0.5	23	4850
Piriwiri Group Zimbabwe	Master (1991)	2000	40	2100	158	0.3	25	54	4460													Wyloo Group, Western Australia	B. Krapez, 1998; Krapez (1999)	2000	30	1970	4300	495	0.5	23	4692			Piriwiri Group Zimbabwe	Master (1991)	2000	40	2040	2100	158	0.3	25	4355
Namoona Group, Northern Australia	Stewart Need-ham, 1998	2100	120	3800	665	0.35	50	950	4302													Namoona Group, Northern Australia	Stewart Need-ham, 1998	2100	120	1980	3800	665	0.35	50	4197			Lomagundi Group Zimbabwe	Master (1991)	2100	60	2160	1200	120	0.4	25	4197
Mt Partridge Group Northern Australia	Stewart Need-ham, 1998	2100	120	2200	370	0.6	28	396	3637													Mt Partridge Group Northern Australia	Stewart Need-ham, 1998	2100	120	1980	2200	370	0.6	28	3532			Silverton Forma-tion South Africa	Eriksson (1994; 1998)	2150	50	2200	1200	255	0.25	85	4077
Lomagundi Group Zimbabwe	Master (1991)	2100	60	1200	120	0.4	25	213	3267													Lomagundi Group Zimbabwe	Master (1991)	2100	60	2040	1200	120	0.4	25	3162			Namoona Group, Northern Australia	Stewart Need-ham, 1998	2100	120	2220	3800	665	0.35	50	3822
Silverton Forma-tion South Africa	Eriksson (1994; 1998)	2150	50	1200	255	0.25	85	0	3147													Silverton Forma-tion South Africa	Eriksson (1994; 1998)	2150	50	2100	1200	255	0.25	85	3042			Mt Partridge Group Northern Australia	Stewart Need-ham, 1998	2100	120	2220	2200	370	0.6	28	3157
Chaibasa Forma-tion E India	Bose et al. (1997); Rajat Mazumber 1998	2350	50	5000	350	0.1	70	0	2892													Huronian Supergroup Southern Canada	Bennett et al. 1991	2350	100	2250	11000	330	0.2	15	2787			Chaibasa Forma-tion E India	Bose et al. (1997); Rajat Mazumber 1998	2350	50	2400	5000	350	0.1	70	2787
Huronian Supergroup Southern Canada	Bennett et al. 1991	2350	100	11000	330	0.2	15	385	2542													Snowy Pass Super- Karlstrom et SE Wyoming	al. (1983)	2350	100	2250	10000	575	0.25	23	2457			Huronian Supergroup Southern Canada	Bennett et al. 1991	2350	100	2450	11000	330	0.2	15	2437
Snowy Pass Super- Karlstrom et SE Wyoming	al. (1983)	2350	100	10000	575	0.25	23	1190	2212													Chaibasa Forma-tion E India	Bose et al. (1997); Rajat Mazumber 1998	2350	50	2300	5000	350	0.1	70	1882			Snowy Pass Super- Karlstrom et SE Wyoming	al. (1983)	2350	100	2450	10000	575	0.25	23	2107
Hamersley Super-group, Western Australia	Barley et al.-1997, Mark Barley, 1998	2460	10	3000	435	0.5	29	750	1637													Hamersley Super-group, Western Australia	Barley et al.-1997, Mark Barley, 1998	2460	10	2450	3000	435	0.5	29	1532			Hamersley Super-group, Western Australia	Barley et al.-1997, Mark Barley, 1998	2460	10	2470	3000	435	0.5	29	1532
Campbelland Subgroup, Ghaap Group, Prieska, South Africa	Altermann and Siegfried (1997); W. Altermann 1997	2530	20	3000	449	0.65	23	1950	1202													Campbelland Subgroup, Ghaap Group, Prieska, South Africa	Altermann and Siegfried (1997); W. Altermann 1997	2530	20	2510	3000	449	0.65	23	1097			Campbelland Subgroup, Ghaap Group, Prieska, South Africa	Altermann and Siegfried (1997); W. Altermann 1997	2530	20	2550	3000	449	0.65	23	1097
Schmidtsdrif, Subgroup Ghaap Group Prieska, South Aftica	Altermann and Siegfried (1997); W. Altermann 1997	2630	20	1600	648	0.9	45	640	753													Schmidtsdrif, Subgroup Ghaap Group Prieska, South Aftica	Altermann and Siegfried (1997); W. Altermann 1997	2630	20	2610	1600	648	0.9	45	648			Schmidtsdrif, Subgroup Ghaap Group Prieska, South Aftica	Altermann and Siegfried (1997); W. Altermann 1997	2630	20	2650	1600	648	0.9	45	648
Woodburn Lake, Group, Canada (Baffin Isl)	Eva Zaleski, 1998	2700		1000	105	0.7	15	10	105													Woodburn Lake, Group, Canada (Baffin Isl)	Eva Zaleski, 1998	2700			1000	105	0.7	15	105			Woodburn Lake, Group, Canada (Baffin Isl)	Eva Zaleski, 1998	2700			1000	105	0.7	15
Sukhopit Group Yenisey Ridge, Siberia	V. A. Vernikovsky, 1998	700-550		4500	720	0.4	40	0
