# Supplementary material for: Volcanism takes a back seat driving global iron deposition after the Great Oxidation Event
Source: Research Square preprint supplement (doi:10.21203/rs.3.rs-3857865/v1), 2024-01-22
Supplement: Supplementary file 4 [file 8c62dc94d0b8b2c0dbc8acb1.xlsx]

## Sheet: Reported in Pehsonan et al 2016
Table. Paleomagnetic poles selected for Paleo-Mesoproterozoic reconstruction model (2000-1800)
Plate ID	Age (Ma)	Rock Unit	Plat (N)	Plon (E)	A95 (deg)	Test*	References	site lat N	site long E	Q(6)**	reported in
Laurentia
640	1818±4	Martin Formation	-9	288	9	f	Evans and Bingham (1973)	59.6	251.4	110111	Pehsonan et al 2016
Slave
41	1870±4	Pearson mean	-22	269	6	C	Mitchell et al. (2010)	65	250	110111	Pehsonan et al 2016
41	~1880	Douglas Peninsula Formation	-18	258	14	---	Irving and McGlynn (1979)	62.8	249.7	101011	Pehsonan et al 2016
41	~1885	Seton mean	-6	260	4	c	Mitchell et al. (2010)	65	250	111111	Pehsonan et al 2016
678	~2025	Lac de Gras dykes	12	268	7	c, C	Buchan et al. (2009)	64.4	249.6	111110	Pehsonan et al 2016
Superior
661	~1880	Molson dykes, B+C2 components	29	218	4	C	after Evans and Halls (2010)	55	262	111111	Pehsonan et al 2016
646	1998±2	Minto dykes	39	172	13	---	after Evans and Halls (2010)	57	285	111011	Pehsonan et al 2016
Fennoscandia
62	~1880	Svecofennian Mean	41	233	5	c	Pesonen et al. (2003)				Pehsonan et al 2016
62	1974±27	Konchozero sill	-14	282	10	C	Pisarevsky and Sokolov (1999)	62.1	34	101110	Pehsonan et al 2016
Siberia (NW or SE of the Vilyuy-Patom axis)
700	1863±9	Upper Akitkan - Chaya River (NW)	-22	98	8	g	Didenko et al. (2009)	57.6	110.8	111110	Pehsonan et al 2016
700	1878±4	Lower Akitkan - Malaya Kosa (NW)	-31	99	4	G, f	Didenko et al. (2009)	54.7	108.8	111110	Pehsonan et al 2016
Australia (N, S, or W craton)
146	~1800	Hamersley Province overprint (W)	-35	212	3	fñ	Li et al. (2000)	-22	118	11010	Pehsonan et al 2016
187	~1890	Frere Formation (W)	-45	220	2	(f)	Williams et al. (2004)	-26.3	121.9	111011	Pehsonan et al 2016
India
712	~1880	Bastar Dykes and Cuddapah sills	-31	150	12	---	Meert et al. (2011)	19	81.5	111011	Pehsonan et al 2016
Plat/Plon, pole latitude/longitude; A95, radius of circle of 95% confidence about the palaeopole.
* Field stability test abbreviations: f ñ fold test, c ñ inverse contact test, C ñ baked-contact test, g ñ conglomerate test, G ñ intraformational conglomerate test,
	R - correlatable polarity reversals. Note: capitalized symbols indicate primary magnetization, whereas lowercase symbols indicate merely ancient
	remanence relative to the geological feature of the test.
** Tabulation of the first six quality criteria of Van der Voo (1990). The seventh criterion is impractical to apply to large databases of Precambrian rocks.

## Sheet: A-Evans2021-all-Elming2021
Code	Rockname	Slat ( N)	Slon ( E)	Nominal age (Ma)	Isoage (Ma)	Method	Age reference	Pol	B	N	D	I	α95	k	Plat ( N)	Plon ( E)	A95	Key	Q1-7 sum	Paleomagnetic
AMAZONIA
Am1	Santa Rosa 2 Sobreiro volcanics	-6.7	307.9	1880	1877.4 ±64.3, 1895+6/-11 1880±6	g	Antonio et al. (2017), Pinho	C	10	109	149.2	79	9.6	26.4	-24.7	319.7	17.7	A	1111111 7	Antonio et al. -2017
Am2	Velho Guilherme suite	-6.6	308	1860	1853.7±66.2	g	Antonio et al. -2017	C	15	110	239.2	10.6	12.4	10.5	-31.1	220.1	9	A	1111111 7	Antonio et al. -2017
Am3	Colider volcanics	-9.5	305.2	1789	1789±6 7	g	Bispo-Santos et al. (2008)	C	10	107	183	53.5	9.8	25	-63.3	298.8	11.4	C 1	1110110 5	Bispo-Santos et al. (2008)
Am4	Avanavero intrusions	4	300	1789	1788.5 ±62.5	g	Reis et al. -2013	N	13	178	138.2	203.4	13	11.1	-48.4	27.9	9.2	A	1011101 6	Reis et al. (2013), Bispo- Santos et al. (2014b)
North Australia craton
NAC1	Hart dolerite sills	-17.2	127	1792	1792+6/- 2	g	Ramsay et al. -2019	C	23	168	83.8	55.3	10	10.1	-5.3	181	12	a	1111111 7	Kirscher et al. -2019
Baltica
	Onega intrusions Baltica 2 Fennoscandia	62.1	34	1976											44.4	101.5	6.3	a	111C100 5	Lubnina et al. 2017
B1	Kiuruvesi-Pielavesi gabbro (Fennoscandia)	63.2	26.8	1886	1886 ±6	g	Marttila -1981	N	3	35	341	30	5	610	41.1	231.3	5.4	b	1110101 5	Neuvonen et al. (1981)
B2	Keuruu dykes (Fennoscandia)	62.3	24.7	1869	1867+6/-8, 1870+6/- 9	g	Klein et al. -2016	C	21	69	340.4	35.2	5.8	31.3	45.7	230.9	5.5	B	1111111 7	Klein et al. -2016
B3	Eastern Murman sill (Fennoscandia)	68.5	37.9	1860	1860+6/-4; 1863+6/-7	g	Veselovskiy et al. (2019)	N	16	16	348.4	53.3	4.6	68	54.7	234.7	5.2	a	1111101 6	Veselovskiy et al. (2019)
B4	Nottra¨sk gabbro (Fennoscandia)	65.8	21.8	1806	1806±6	g	Sadeghi and Hellstro¨m -2017	N	6	25	348.9	35.9	5.5	148	43.5	216.5	6.1	B	1110101 5	Elming (1985)
B5	Lake Ladoga mean intrusions (Fennoscandia)	61.3	30	1800	1802±6	g	Konopelko and Ivanikov -1996	C	4	42	347	40.6	7.6	146	50.9	229.1	7.2	B	1110111 6	Mertanen et al. -2006
India
I1	Bastar dykes, combined (Dharwar)	19.5	81.6	1887	1891+6/- 9	g	French et al. -2008	C	13	101	113.1	2.7	11	16	-21.2	162.1	7.6	B	1110111 6	NPW (2014) working group
I2	Dharwar dykes, combined 1.88 Ga (Dharwar)	16.4	78.9	1885	1885+6/-3.1	g	Belica et al. -2014	C	58	530	129.1	4.2	4.5	18	-36.5	153.5	3.2	A	1111111 7	Belica et al.
Kalahari
K1	Mashonaland dolerites (Zimbabwe)	218	32	1880	1880 +6/-5, 1877+6/- 2.2, 1885.9±62.4, 1875.6± 61.6	e, f	Hanson et al. -2011	C	29	239	292	49	5	36	-8	158	5	A	1111110 6	Bates and Jones (1996)
K2	Sand River dykes	-22.4	30	1876	1876.6±68	f	Barton (1979)	C	6	41	318	72.5	6	123.8	-2.5	189.2	10.1	B	0110110 4	Morgan (1985)
K3	Black Hill dykes	-25.2	30.6	1855	1852+6/- 5, 1863+ 6/- 7	g	Olsson et al. -2016	C	7	34	126.9	258.7	11.5	24.2	-9.4	172	14.7	A	1111110 6	Lubnina et al. (2010a)
Laurentia
L1	Ghost dike swarm (Slave)	62.6	244.6	1887	1887+6/-5, 1884±6	g	Buchan et al. -2016	C	23	-	350	248	5	32	-2	286	6	A	1111110 6	Buchan et al.
L2	MEAN Seton/ Akaitcho/Mara (Slave)	65	250	1885	1885+6/-5	c	Bowring and Grotzinger (1992), Buchan et al. -2016	C	82	-	169.5	34	-	-	-6	260	4	B	1111111 7	Mitchell et al. -2010
L3	MEAN Kahochella, Peacock Hi11s (Slave) Peacock Hi11s (Slave)	65	250	1882	1882+6/- 4	c	Bowring and Grotzinger -1992	C	33	-	145.4	16.9	-	-	-12	285	7	B	1100111 5	Mitchell et al. -2010
L4	Molson B 1C2 (Superior)	66.7	248.6	1879	1877 +17/-24	g	Halls and Heaman -2000	C		-	248.6	66.7	-	-	-8.9	218	3.8	A	1111111 7	Evans and Halls (2010)
L5	Douglas Peninsula fm, Pethei Group (Slave)	62.8	249.7	1876	older than 1870+6/-4; younger than 1882+6/-4	c	Mitchell et al. -2010	M	6	43	172	18	19	14	-18	258	14.2	B	1010111 5	Irving and McGlynn -1979
L6	Takiyuak fm (Slave)	66.1	246.9	1876	older than 1870+6/-4; younger than 188+ 6/-4	c	Mitchell et al. -2010	M	17	111	178	19	10	15	-13	249	8	B	1110111 6	Irving and McGlynn -1979
L7	MEAN Haig/Flaherty/Sutton (Superior)	38.7	247.8	1870	1870+6/- 1	c	Hamilton and Stott (2008)	M	27	100	38.7	247.8	-	-	1	245.8	3.9	B	1111111 7	NPW (2009) working group
L8	MEAN Pearson A/Peninsular sill/ Kilohigok basin sill (Slave)	65	250	1870	older than 1870+6/-4; younger than 1882+6/-4	c	Mitchell et al. -2010	M	22	-	162.4	3.5	-	-	-22	269	6	A	1101111 6	Mitchell et al. -2010
L9	Sparrow Dykes (Rae)	61.6	250.2	1827	1827+6/-4	c	Bostock and van Breemen -1992	C	10	54	131	51	7	50	12	291	7.9	B	1110110 5	McGlynn et al. -1974
L10	Martin fm. (Rae)	59.6	251.4	1818	1827+6/-4	c	Morelli et al. -2009	C	15	56	322.5	229.4	10.4	15	-9	288	8.5	A	1101110 5	Evans and Bingham -1973
	Sourdough dikes Laurentia 2 Wyoming	44.7	251.7	1899											49.2	292	8.1	A	111C110 6	Kilian et al. 2016
Siberia
S1	Lower Akitkan Khibelen group, Malaya Kosa fm	54.7	108.8	1878	1849 6 11, 1875 6 14, 1864 6 11, 1877 6 3.8, 1870.7 64, 1878 6 4	g	Poller et al. (2004), Didenko et al. (2009a,b)	R		30	188.7	8.1	5	110.6	-30.8	98.7	3.5	A	1111101 6	Didenko et al. (2009a,b)
S2	Upper Akitkan	57.6	110.8	1863	1863 6 8.7, 1863 6 9	g	Didenko et al. (2009a,b)	R		108	192.5	18.6	6.9	50.5	-22.1	97.5	5.2	A	1111101 6	Didenko et al. (2009a,b)
S3	Shumikhinsk granitoids	52.1	103.8	1851	1844 6 1, 1844 6 15, 1855 6 5	g	Shcherbakova et al. (2006), Larin and Sal’nikova -2003	M		92	177.4	24.6	6.6	8.9	-24.9	106.6	5.2	B	1010011 5	Didenko et al. -2003
aKey-column indicates that the pole has not been graded yet. Q—van der Voo (1990) criteria (not updated following Meert et al., 2020).
bThe quality of the pole is lower than C+ -grade.
Code—code used in figures of this chapter. Rockname—name of the rock unit. Slat/Slong—latitude/longitude of sampling site. Nominal age—used age, mean of several age determinations or the one favored by pole authors. Isoage—isotope age results. Method—a: geological (APWP), c: 39Ar-40Ar, d: K-Ar, e: Rb-Sr (mineral isochron), f: Rb-Sr (whole rock), g: U-Pb, h: Sm-Nd, j: Pb-Pb, k: Lu-Hf, s: stratigra…
