# Supplementary material for: Volcanism takes a back seat driving global iron deposition after the Great Oxidation Event
Source: Research Square preprint supplement (doi:10.21203/rs.3.rs-3857865/v1), 2024-01-22
Supplement: Supplementary file 5 [file 9d97466fa4b2ded329406417.xlsx]

## Sheet: PlotDat1
Source sheet	Sheet2	0.0886646	0.0134622	0.0813823	0.0124	0.0819749	0.0124874	0.0891584	0.0134895	0.0889736	0.0134739	0.0887674	0.0134638
Plot name	Concordia1	0.0886967	0.0134575	0.0814907	0.012416	0.083041	0.0126444	0.0891539	0.0134937	0.0889711	0.0134763	0.0887661	0.013465
Plot Type	1	0.0886311	0.0134553	0.0817327	0.0124517	0.0841082	0.0128015	0.0891411	0.0134974	0.0889639	0.0134783	0.0887626	0.0134661
1st free col	15	IsoLine	IsoLine	0.0819749	0.0124874	0.0851764	0.0129587	0.0891201	0.0135004	0.0889521	0.0134801	0.0887567	0.013467
Sigma Level	2			0.0822171	0.0125231	0.0862456	0.0131158	0.0890913	0.0135028	0.0889359	0.0134814	0.0887488	0.0134676
Absolute Errs	FALSE			0.0824594	0.0125588	0.087316	0.013273	0.0890552	0.0135045	0.0889157	0.0134823	0.0887388	0.0134681
Symbol Type	1			0.0827017	0.0125945	0.0883873	0.0134302	0.0890124	0.0135054	0.0888917	0.0134828	0.088727	0.0134683
Inverse Plot	FALSE			0.082944	0.0126302	0.0894598	0.0135874	0.0889637	0.0135057	0.0888644	0.0134829	0.0887136	0.0134683
Color Plot	FALSE			0.0831865	0.0126659	0.0905332	0.0137446	0.0889099	0.0135051	0.0888342	0.0134825	0.0886987	0.0134681
3D plot	FALSE			0.0834289	0.0127016	0.0916078	0.0139019	0.0888518	0.0135039	0.0888016	0.0134817	0.0886827	0.0134677
Linear	FALSE			0.0836715	0.0127373	0.0926834	0.0140592	0.0887906	0.0135019	0.0887673	0.0134805	0.0886658	0.013467
Data Range	B5:F7			0.083914	0.012773	IsoLine	IsoLine	0.0887272	0.0134993	0.0887317	0.0134789	0.0886483	0.0134662
Filled Symbols	TRUE			0.0841567	0.0128087			0.0886627	0.013496	0.0886956	0.0134769	0.0886305	0.0134652
				0.0843994	0.0128444			0.0885982	0.0134921	0.0886594	0.0134746	0.0886127	0.013464
				0.0846421	0.0128801			0.0885349	0.0134878	0.0886239	0.013472	0.0885953	0.0134626
				0.0848849	0.0129158			0.0884738	0.013483	0.0885897	0.0134692	0.0885784	0.0134611
				0.0851278	0.0129515			0.088416	0.0134778	0.0885573	0.0134661	0.0885625	0.0134596
				0.0853707	0.0129872			0.0883624	0.0134724	0.0885272	0.013463	0.0885477	0.0134579
				0.0856137	0.0130229			0.088314	0.0134668	0.0885001	0.0134597	0.0885344	0.0134562
				0.0858567	0.0130587			0.0882716	0.0134611	0.0884763	0.0134564	0.0885227	0.0134545
				0.0860998	0.0130944			0.0882359	0.0134554	0.0884563	0.0134531	0.0885128	0.0134528
				0.0863429	0.0131301			0.0882076	0.0134499	0.0884405	0.0134498	0.088505	0.0134512
				0.0865861	0.0131658			0.0881871	0.0134445	0.088429	0.0134468	0.0884994	0.0134496
				0.0868293	0.0132015			0.0881747	0.0134395	0.088422	0.0134438	0.088496	0.0134481
				0.0870726	0.0132373			0.0881707	0.0134349	0.0884198	0.0134412	0.0884949	0.0134467
				0.0873159	0.013273			0.0881752	0.0134307	0.0884223	0.0134388	0.0884961	0.0134455
				0.0875593	0.0133087			0.088188	0.0134271	0.0884295	0.0134367	0.0884997	0.0134444
				0.0878028	0.0133444			0.088209	0.013424	0.0884413	0.013435	0.0885055	0.0134436
				0.0880463	0.0133802			0.0882378	0.0134216	0.0884575	0.0134337	0.0885135	0.0134429
				0.0882899	0.0134159			0.0882739	0.01342	0.0884777	0.0134328	0.0885234	0.0134425
				0.0885335	0.0134516			0.0883167	0.013419	0.0885017	0.0134323	0.0885352	0.0134422
				0.0887772	0.0134873			0.0883654	0.0134188	0.0885291	0.0134322	0.0885487	0.0134422
				0.0890209	0.0135231			0.0884193	0.0134193	0.0885593	0.0134326	0.0885636	0.0134424
				0.0892647	0.0135588			0.0884773	0.0134205	0.0885918	0.0134334	0.0885796	0.0134429
				0.0895085	0.0135945			0.0885385	0.0134225	0.0886262	0.0134346	0.0885965	0.0134435
				0.0897524	0.0136303			0.0886019	0.0134251	0.0886617	0.0134362	0.088614	0.0134443
				0.0899963	0.013666			0.0886664	0.0134284	0.0886979	0.0134381	0.0886317	0.0134454
				0.0902403	0.0137018			0.0887309	0.0134323	0.088734	0.0134404	0.0886495	0.0134466
				0.0904844	0.0137375			0.0887942	0.0134366	0.0887695	0.013443	0.088667	0.0134479
				0.0907285	0.0137732			0.0888553	0.0134415	0.0888037	0.0134459	0.0886838	0.0134494
				0.0909727	0.013809			0.0889131	0.0134466	0.0888362	0.0134489	0.0886998	0.013451
				0.0912169	0.0138447			0.0889667	0.013452	0.0888662	0.0134521	0.0887146	0.0134526
				0.0914612	0.0138805			0.0890151	0.0134576	0.0888933	0.0134554	0.0887279	0.0134543
				0.0917055	0.0139162			0.0890575	0.0134633	0.0889171	0.0134587	0.0887396	0.013456
				0.0919499	0.013952			0.0890932	0.013469	0.0889371	0.013462	0.0887494	0.0134577
				0.0921943	0.0139877			0.0891215	0.0134745	0.088953	0.0134652	0.0887572	0.0134594
				0.0924388	0.0140235			0.089142	0.0134799	0.0889645	0.0134683	0.0887629	0.013461
				0.0926833	0.0140592			0.0891544	0.0134849	0.0889714	0.0134712	0.0887663	0.0134625
				0.0929279	0.014095			0.0891584	0.0134895	0.0889736	0.0134739	0.0887674	0.0134638
				0.093	0.0141055			ErrEll	ErrEll	ErrEll	ErrEll	ErrEll	ErrEll
				IsoLine	IsoLine

## Sheet: PlotDat4
Source sheet	Sheet2	0.0886646	0.0134622	0.0872	0.013256	0.087316	0.013273	0.0891584	0.0134895	0.0889736	0.0134739	0.0887674	0.0134638
Plot name	Concordia2	0.0886967	0.0134575	0.0872186	0.0132587	0.0875302	0.0133044	0.0891539	0.0134937	0.0889711	0.0134763	0.0887661	0.013465
Plot Type	1	0.0886311	0.0134553	0.0872673	0.0132658	0.0877444	0.0133359	0.0891411	0.0134974	0.0889639	0.0134783	0.0887626	0.0134661
1st free col	15	IsoLine	IsoLine	0.087316	0.013273	0.0879587	0.0133673	0.0891201	0.0135004	0.0889521	0.0134801	0.0887567	0.013467
Sigma Level	2			0.0873646	0.0132801	0.088173	0.0133987	0.0890913	0.0135028	0.0889359	0.0134814	0.0887488	0.0134676
Absolute Errs	FALSE			0.0874133	0.0132873	0.0883873	0.0134302	0.0890552	0.0135045	0.0889157	0.0134823	0.0887388	0.0134681
Symbol Type	1			0.087462	0.0132944	0.0886017	0.0134616	0.0890124	0.0135054	0.0888917	0.0134828	0.088727	0.0134683
Inverse Plot	FALSE			0.0875107	0.0133016	0.0888162	0.0134931	0.0889637	0.0135057	0.0888644	0.0134829	0.0887136	0.0134683
Color Plot	FALSE			0.0875594	0.0133087	0.0890307	0.0135245	0.0889099	0.0135051	0.0888342	0.0134825	0.0886987	0.0134681
3D plot	FALSE			0.0876081	0.0133159	0.0892452	0.013556	0.0888518	0.0135039	0.0888016	0.0134817	0.0886827	0.0134677
Linear	FALSE			0.0876568	0.013323	IsoLine	IsoLine	0.0887906	0.0135019	0.0887673	0.0134805	0.0886658	0.013467
Data Range	B5:F7			0.0877054	0.0133301			0.0887272	0.0134993	0.0887317	0.0134789	0.0886483	0.0134662
Filled Symbols	TRUE			0.0877541	0.0133373			0.0886627	0.013496	0.0886956	0.0134769	0.0886305	0.0134652
				0.0878028	0.0133444			0.0885982	0.0134921	0.0886594	0.0134746	0.0886127	0.013464
				0.0878515	0.0133516			0.0885349	0.0134878	0.0886239	0.013472	0.0885953	0.0134626
				0.0879002	0.0133587			0.0884738	0.013483	0.0885897	0.0134692	0.0885784	0.0134611
				0.0879489	0.0133659			0.088416	0.0134778	0.0885573	0.0134661	0.0885625	0.0134596
				0.0879976	0.013373			0.0883624	0.0134724	0.0885272	0.013463	0.0885477	0.0134579
				0.0880464	0.0133802			0.088314	0.0134668	0.0885001	0.0134597	0.0885344	0.0134562
				0.0880951	0.0133873			0.0882716	0.0134611	0.0884763	0.0134564	0.0885227	0.0134545
				0.0881438	0.0133945			0.0882359	0.0134554	0.0884563	0.0134531	0.0885128	0.0134528
				0.0881925	0.0134016			0.0882076	0.0134499	0.0884405	0.0134498	0.088505	0.0134512
				0.0882412	0.0134087			0.0881871	0.0134445	0.088429	0.0134468	0.0884994	0.0134496
				0.0882899	0.0134159			0.0881747	0.0134395	0.088422	0.0134438	0.088496	0.0134481
				0.0883387	0.013423			0.0881707	0.0134349	0.0884198	0.0134412	0.0884949	0.0134467
				0.0883874	0.0134302			0.0881752	0.0134307	0.0884223	0.0134388	0.0884961	0.0134455
				0.0884361	0.0134373			0.088188	0.0134271	0.0884295	0.0134367	0.0884997	0.0134444
				0.0884848	0.0134445			0.088209	0.013424	0.0884413	0.013435	0.0885055	0.0134436
				0.0885336	0.0134516			0.0882378	0.0134216	0.0884575	0.0134337	0.0885135	0.0134429
				0.0885823	0.0134588			0.0882739	0.01342	0.0884777	0.0134328	0.0885234	0.0134425
				0.088631	0.0134659			0.0883167	0.013419	0.0885017	0.0134323	0.0885352	0.0134422
				0.0886798	0.0134731			0.0883654	0.0134188	0.0885291	0.0134322	0.0885487	0.0134422
				0.0887285	0.0134802			0.0884193	0.0134193	0.0885593	0.0134326	0.0885636	0.0134424
				0.0887772	0.0134874			0.0884773	0.0134205	0.0885918	0.0134334	0.0885796	0.0134429
				0.088826	0.0134945			0.0885385	0.0134225	0.0886262	0.0134346	0.0885965	0.0134435
				0.0888747	0.0135016			0.0886019	0.0134251	0.0886617	0.0134362	0.088614	0.0134443
				0.0889235	0.0135088			0.0886664	0.0134284	0.0886979	0.0134381	0.0886317	0.0134454
				0.0889722	0.0135159			0.0887309	0.0134323	0.088734	0.0134404	0.0886495	0.0134466
				0.089021	0.0135231			0.0887942	0.0134366	0.0887695	0.013443	0.088667	0.0134479
				0.0890697	0.0135302			0.0888553	0.0134415	0.0888037	0.0134459	0.0886838	0.0134494
				0.0891185	0.0135374			0.0889131	0.0134466	0.0888362	0.0134489	0.0886998	0.013451
				0.0891672	0.0135445			0.0889667	0.013452	0.0888662	0.0134521	0.0887146	0.0134526
				0.089216	0.0135517			0.0890151	0.0134576	0.0888933	0.0134554	0.0887279	0.0134543
				0.0892648	0.0135588			0.0890575	0.0134633	0.0889171	0.0134587	0.0887396	0.013456
				0.0893135	0.013566			0.0890932	0.013469	0.0889371	0.013462	0.0887494	0.0134577
				0.0893623	0.0135731			0.0891215	0.0134745	0.088953	0.0134652	0.0887572	0.0134594
				0.0894111	0.0135803			0.089142	0.0134799	0.0889645	0.0134683	0.0887629	0.013461
				0.0894598	0.0135874			0.0891544	0.0134849	0.0889714	0.0134712	0.0887663	0.0134625
				0.0895086	0.0135946			0.0891584	0.0134895	0.0889736	0.0134739	0.0887674	0.0134638
				0.0895458	0.0136			ErrEll	ErrEll	ErrEll	ErrEll	ErrEll	ErrEll
				IsoLine	IsoLine

## Sheet: Table
Table . U-Pb isotopic data.
					Ratios								Ages (Ma)
Sample	Pb(c)	Pb*	U	Th	206 Pb	208 Pb	206 Pb		207 Pb		207 Pb		206 Pb		207 Pb		207 Pb		corr.	Chemical
Fractions	(pg)	Pb(c)	(pg)	U	204 Pb	206 Pb	238 U	err	235 U	err	206 Pb	err	238 U	err	235 U	err	206 Pb	err	coef.	abrasion
(a)	(b)		(c)		(d)	(e)	(f)	(2σ%)	(f)	(2σ%)	(f)	(2σ%)		(2σ)		(2σ)		(2σ)
A1803-147
z14	0.174797	55.0155	23.9972	0.864379	2911.93	0.249742	0.340864	0.376405	5.43893	0.480047	0.115778	0.276728	1890.82	6.16837	1891.01	4.11731	1891.22	5.0122	0.815	180/10 hrs	0.0208719		3
z17	0.170761	63.8968	26.8878	0.927048	3335.02	0.267864	0.340647	0.19313	5.42979	0.283068	0.115657	0.192538	1889.78	3.16343	1889.57	2.42721	1889.34	3.51243	0.72561	180/10 hrs	-0.0233582
z13	0.509232	18.5222	23.2037	0.937747	977.205	0.270976	0.340366	0.278499	5.44241	0.63979	0.116022	0.546708	1888.43	4.55894	1891.56	5.48795	1895	9.84923	0.524704	180/10 hrs	0.346576
z16	0.168396	78.9016	32.8186	0.922778	4118.08	0.266663	0.340196	0.160488	5.41353	0.232627	0.115464	0.154396	1887.61	2.62617	1887	1.99377	1886.32	2.83848	0.73679	180/10 hrs	-0.0686585
z1	0.334186	72.0696	70.4027	0.187665	4447.65	0.0542344	0.340017	0.0683884	5.42909	0.159695	0.115856	0.125742	1886.75	1.11864	1889.46	1.3693	1892.43	2.33393	0.61115	210/12 hrs	0.300149
z4	0.394684	29.3732	29.3022	0.819612	1577.97	0.236879	0.339757	0.195537	5.42074	0.393568	0.115767	0.323885	1885.5	3.1966	1888.14	3.37383	1891.04	5.85604	0.566611	210/12 hrs	0.293298
LA1818
z6	0.194801	85.7705	42.5161	0.784321	4609.12	0.226654	0.340162	0.16737	5.40961	0.227444	0.115392	0.139295	1887.45	2.73857	1886.38	1.94912	1885.2	2.57317	0.779164	180/10 hrs	-0.119283
z1	0.266878	125.362	84.3128	0.831632	6659.29	0.240341	0.339942	0.13131	5.41323	0.187026	0.115544	0.114874	1886.39	2.14751	1886.95	1.60292	1887.57	2.14621	0.773783	180/10 hrs	0.0623098
z4	0.349061	32.7494	28.2164	0.929728	1716.83	0.268698	0.339823	0.167609	5.42813	0.364811	0.115902	0.309782	1885.82	2.74045	1889.31	3.12797	1893.14	5.60214	0.52494	180/10 hrs	0.38662
A1709-1
z24	0.641002	19.4578	31.5855	0.808014	1053.9	0.233517	0.339914	0.210561	5.43086	0.568559	0.115929	0.511981	1886.26	3.44342	1889.74	4.87534	1893.57	9.22738	0.436246	180/10 hrs	0.385961
z23	0.68507	26.6806	45.2446	0.916271	1406.31	0.264804	0.339899	0.178911	5.4139	0.430783	0.115573	0.375552	1886.18	2.92573	1887.06	3.69212	1888.02	6.78429	0.489959	180/10 hrs	0.0971775
z29	0.160943	76.2449	29.8421	1.00501	3912.21	0.290472	0.339616	0.203308	5.40823	0.287623	0.115547	0.1849	1884.82	3.32262	1886.16	2.46474	1887.63	3.3776	0.759745	180/10 hrs	0.148507
z30	0.226979	141.903	81.7574	0.816605	7559.54	0.236085	0.338573	0.0935051	5.39056	0.145691	0.115525	0.0914009	1879.8	1.52463	1883.36	1.24784	1887.28	1.74284	0.755923	180/10 hrs	0.395993
Notes:
(a) Thermally annealed and pre-treated single zircon. Data used in date calculation are in bold.
(b) Total common-Pb in analyses.
(c) Total sample U content.
(d) Measured ratio corrected for spike and fractionation only.
(e) Radiogenic Pb ratio.
(f) Corrected for fractionation, spike and blank. Also corrected for initial Th/U disequilibrium using radiogenic 208Pb and Th/Umagma = 2.8.
Mass fractionation correction of 0.25%/amu ± 0.04%/amu (atomic mass unit) was applied to single-collector Daly analyses.
All common Pb assumed to be laboratory blank. Total procedural blank less than 0.1 pg for U.
Blank isotopic composition: 206Pb/204Pb = 18.15 ± 0.47, 207Pb/204Pb =15.30 ± 0.30, 208Pb/204Pb = 37.11 ± 0.87.
Corr. coef. = correlation coefficient.
Ages calculated using the decay constants λ238 = 1.55125E-10 and λ235 = 9.8485E-10 (Jaffey et al. 1971).

## Sheet: Means
	238/206 *From MIT data processing (weighted mean Th corrected								207/206 from isoplot
	AGE	2sigma error analytical	Y(+tracer)	z[+ decay from isoplot	Minimum age	MSWD	N	AGE	2sigma error analytical	External [+ decay]	maximum age	MSWD	N
LA1818	1886.5	1.4	1.6	2.6	1884.9	0.37	3	1887.12	1.58	6.07		3.51	3
A1803-147	1887.16	0.91	1.2	2.3	1885.96	1.2	6	1890.1	1.45	6.04		2.56	6
A1709-1	1885.8	1.9	2	2.8	1883.8	0.24	3	1888.28	2.89	6.54		0.73	3
