# Supplementary material for: Volcanism takes a back seat driving global iron deposition after the Great Oxidation Event
Source: Research Square preprint supplement (doi:10.21203/rs.3.rs-3857865/v1), 2024-01-22
Supplement: Supplementary file 6 [file Post-GOEdata.xlsx]

## Sheet: Sheet1
Thickness	Area	Age	uncertainty	Min_age	Max_age	TYPE	age_height
10	7.97255e+08	NaN	NaN	1804	1895	minmax
700	3.80829e+08	1886	2	1884	1888	strat	500
20	1.71907e+09	NaN	NaN	1855	1913	minmax
190	2.20287e+09	1877.52	8.74	1868.78	1886.26	strat	60
228.6	1.60408e+10	1877.52	8.74	1868.78	1886.26	strat	121
130	2.29613e+09	NaN	NaN	1870	NaN	min
375	5.45544e+10		NaN	1878.5	NaN	min
1066.8	8.3544e+09		NaN	1891	NaN	min
250	2.14584e+10	1890	20	1870	1910	strat	12
183	1.60408e+10		NaN	1870	NaN	min
228	8.3544e+09		NaN	1874	NaN	min
243	8.94141e+07	1874	18	1856	1892	strat	213
100	240000		NaN	1895	1928	minmax
100	170000000		NaN	2000	2200	minmax
100	1.71907e+09		NaN	1974	2100	minmax
36	262500	2080	45	2035	2125	minmax
20	1.60408e+10	NaN	NaN	1832	2236	minmax
60	40000000	NaN	NaN	2000	2300	minmax
20	1050000000	NaN	NaN	2080	2170	minmax
50	7500000	NaN	NaN	2100	2216	minmax
400	118900000	NaN	NaN	2100	2380	minmax
450	225000000	NaN	NaN	2200	2615	minmax
40	62159920644	NaN	NaN	2266	2310	minmax
60	62159920644	NaN	NaN	2393	2426	minmax
